# Supplementary material for: Evolutionary history of the iroquois/Irx genes in metazoans
Source: PubMed Central journal article supplement (PMC2674049; doi:10.1186/1471-2148-9-74), 2009-04-15
Supplement: 1471-2148-9-74-S1.pdf [file 1471-2148-9-74-S1.pdf]

## IRX PROTEINS

### *Drosophila melanogaster*

>mirr\_Dromel

MTVHSNETGICLVMNAVSTHLATSSPNTPTPNAPQSPSTLPTLACPAAQPLSAPGIAGPGH  
SGMVTSTVPPGARSTSPCGPSAGLPALSLVGAPPPGPHSSAPGGAPAPGAGNPPNRCCDTGR  
TIYTDVPSGQTCSCQYDMLNYQRLAAAGGVPLGVYPEGMSAYLSGIAADQPPFYANPAGID  
LKENLVAGASWPYPSPMYHPYDAAFAGYPFNSYGM DLNGARRKNATRETTSTLKAWLNEHKK  
NPYPTKGEKIMLAIITKMTLTQVSTWTFANARRRLKKENKMTWEPRNRVDDDDANIDDDDDKN  
TEDNDLLDAKDSGVGSTDDKDRSGRLGDMMDRPGESNNSEWSESRPGSPNGSPDLYDRPGS  
MPPGAHPLFHFAALHHHFRPPAGSPPDIAAYHHHQQLLQQHQQAQQNSLQTAVGGTAKPRI  
WSLADMASKDSKDSSSGAKDNHPELPPAHPGFYGHGPGQQPSPGKILSPLAARI PNYSYVVRP  
DLYRGFYGPAAAHLGAPTQEFLEHQRTFGASLAAHNGPLGMNPLLWKA AVSGAANGHHFAPL  
SLTTSGGSSGGQQVAPPVAVSPASSSSSSSMGCDVVHIPTSSGQSA AQHMMGPISSNSTASS  
SSSHSGKISPGVNVTSLSAKP

>ara\_Dromel

MAAYTQFGYGGFSPASQLLPPSVQTTEDASANVNVNVNEALVMTNAPAMSPTGGQDCQGSQP  
SGGAGGDASSGALSPNALSQNSNAATVVGAGGGSSAGGGGPADLATGGSLDGNVGTTPTAG  
GAGGGGCCENGRPIIMTDPVSGQTVCSQYDSARLALSSYSRLPAASVGVYGTYPSTQNP  
YQSIGVDSSAFYSPLSNPYGLKDTGAGPEMGAWTSAGLQPTTGYYSYDPM SAYGGLLVSNSS  
YGASYDLAARRKNATRESTATLKAWLNEHKKNPYPTKGEKIMLAIITKMTLTQVSTWTFANAR  
RRLKKENKMTWEPKNRTDDDDDALVSDDEKDKEDLEPSKGSQGSVSLAKDETKEEEDAIDED  
QKCLGQANILRAGFGYPSAGSGSGGYPGGGSSSGHPGGYHPYHHQHPAYYQAGQQGGMLPF  
HGENSKLQTDLGD PKNQLGRDCGVP IPATKPKIWSLADTVGCKTPPPAYMGHQSMPLQOQQQQ  
QOQQOQQAQHQYPPSEAGR DQQLFNAAAPYLRPHTTAYGGFLGATTQQLHTTNSIPYSNM  
PPQOQQPQOQQOQLQOQGTIHTTGSSSGPIIPLQFHNRHPQOQQOQLQOQSQSTASQRAMGFL  
EAQPDTPPQTPPNMKVLSGALSLLPTATQVPM TATCRSSNAFGFPASGYPMNFSARLGEYSP  
RDDYSSGNSSSSSSSSPQLQRNEAMFKPLFKFTN

>caup\_Dromel

MAAYAQFGYAGYPTANQLTTANTDSQSGHGGGSPLSGTNEASLSPSGGSTATGLTAGPLSPG  
AVSQSSHAGHKGLSTSPAEDVVG GDVPVGLSSAAQDLPSRGSCCENGRPIITDPVSGQTV C  
SCQYD PARLAIGGYSRMALPSGGVGVGVYGGPYPSNEQNPYPSIGVDNSAFYAPLSNPYGIK  
DTSPSTEMSAWTSASLQSTTGYYSYDPTLAA YGYGPNYDLAARRKNATRESTATLKAWLSEH  
KKNPYPTKGEKIMLAIITKMTLTQVSTWTFANARRRLKKENKMTWEPKNKTEDDDDDGMSDDE  
KEKDAGDGGKLSTEAFDPGNQLIKSELGKAEKEVDSSGDQKLDLDREPHNLVAMRGLAPYAT  
PPGAHPMHAAYSSYAQSHNTHTHPHPQQMQHHQOQQOQQOQQOQQOQLQHHQMDQPYHPGGYGO  
EESGEFAAQKNPLSRDCGIPVPASKPKIWSVADTAACKTPPPTAAYLGQNFYPPSSADQQLP  
HQPLQQHQOQQOQLQOQQOQH HHHHPHHHHPHSMELGSPLSMMSSYAGGSPYSRIPTAYTEA  
MGMHL PSSSSSSSSTGKLPPTHIH PAPQRVGFPEIQPDTPPQTPPTMKLNSSGGSSSSSSGSS  
HSSMHSVTPVTVASMVN ILYSNTDSGYGHGSHGHGHGHGLGHGHGLGHGHGHMGVTSN  
AYLTEGGRSGS

### *Anopheles gambiae*

>irx1\_Anogam

MIETVIGERRSSGF AVAGEEKTMSHF PFRGSPSAQSTTPTVPSAPSSPPTAPVAMAVTTVPP  
SARSASPCSATSGPPTS GPGGAAGSGGSSGGRCCDTGRPIFTDPI SGQTVCSQYDLISYQR  
LASAGIAGPGGVPLSMYSAPYSPETMAAYFPAIGADQAPFYANPAAAGIDLKENLAAGGAPW  
PYPSVYHPYDAAFYGFNSYGM DLNGARRKNATRETTSTLKAWLNEHKKNPYPTKGEKIMLA  
IITKMTLTQVSTWTFANARRRLKKENKMTWEPRNRVEDDDVNLD DDDDDDNKSLKDDKEILDSK  
DSGTGSSSEDGDRPSRLDMLDRPGGSEWNGSRNGSGPNSPDIYDRGVPGHHHPLLHPSNFPF  
HLRPAISTPPDVNHTPSGSTNPSTKPRIWSLADMASKE SKDS DSSSPTAGGYPSPGKMPVTP

LAGRGLNPLHHHPYMRPDFYRNLYGHHLAPGSPEVSLLESYQRTFGATIGAHNGLPVSISPL  
ITKASGSGPPFAPLSLTTANHHLHQQQHPHTAPPPGASPASSTSSNGPENLTPTSVSLPSGT  
GPNEVKLINVLANSKAP

>irx2\_Anogam

MQGGSSLGSSAVLSLLVSGGQTTTASSQSPISATNAPSLSPGGSATGAPSGALSPGAVSQTS  
QNNASLGGGGGGGGGGGGGGGGGGPPTSCCENGRPIMTDPVSGQTVCSQCQYDSARLALSGYSR  
IPTGSVGVTYPYSTEQNPYPSIGVDSSAFYSPLSNPYALKDSGPTSDMTAWTSAGLQPTT  
GYYPYDPTLAAYGYGAGYDLAARRKNATRESTATLKAWLNEHKKNPYPTKGEKIMLAIITKM  
TLTQVSTWFANARRRLKKNKMTWEPKNKTDDDDDDAMVSDDEKDKDDLDPDKGGRDHKGRKRT  
EDSSRNVMFLFLASLHCAHRARDGRIGRACIVLLAAVGVSGQFLRHNGQPNGKTAEQHRNDT  
RTQCQSCPHSCLHGKSVSSGDMHDKNQTGSDCGVP I PASKPKIWSLADTAACKTPPP HLLP  
LHLQH HHHQHHPHQQQQQQLQHPHQHHPQQQQQSHPVQGLHGSWMTGTSVDYHPNQSQQAAH  
HLQQQHLQQQSSQQTQHLLQQQQQQHHVQHQGNNSGANSMMMI GDAGSPMSMSMGNTTTNNS  
SSSNTPPNSQGMGSMGNGMMS SFGSTPYSRYGGFLAGA QHYNTT LSSSSNSSNSNTSNHS  
STTGPVLNHPPTPTLQQQQQHQQNNLQQQQQQQSSQSMNSTPSQQQQQSMGFPEVQTDTPPQ  
TPPNMKLP SMAANLLTPTTGTCTYSSTNGSTPNTASNGSSSNNNNNNNNNPSTANNNAGGSS  
SGYASSPDSMSQQGTGGYYRMQQQQQE QPDGFKPFFKK

### ***Aedes aegypti***

>irx1\_Aedaeg

MIETVTNSERRSSIIPGGEKTMSHFPPFRGSPTTQSTTPSAPSAPSSPPAAPVAMAVTTTTVPPG  
ARSTSPCSATSGPPTSGSGRCCDTGRPIFTDPIISGQTVCSQCQYDLINYQRLASAGIAGPGGV  
PLSMYSAPYSPETMAAYFPAIGADQAPFYANPAAAGIDLKENLAAGGAPWPYPSVYHPYDAA  
FGYPFNSYGMDLNGARRKNATRETTSTLKAWLNEHKKNPYPTKGEKIMLAIITKMTLTQVST  
WFANARRRLKKNKMTWEPNRNVEDDDVNLDDDDDDNKS LKDDKEILDSKDSGTGSSEEDGDR  
PSRLDMLDRPGNSEWNGSRNGSGPNSPDIYDRPIHGHPLLHPSNFPPhLRSTIGTPPEVNHT  
PSGSTNSKPRIWSLADMASKENKDS DSSSPTAGGYPSPGKIIAPLAGRGINPLHHHPYMRP  
EFYRNLYGPHLTPGSPEVSLLESYQRTFGATLAHNGIPVGMNPLISKASGSGPPFAPLSLTT  
SSNPTTAPQPGASPASSTSSGPENLTPSSPANEKLISVTNASKP

>irx2\_Aedaeg

MEISLTSLGIESIIVPATRYTNVKMATLAKKLSVNNCRSAEKNTKLRSLCPTKLIITFLAT  
LLWSIVVYASCRCREVRVAISECECSPTVNRTEAVFILGIRLCDFPSSPDGCRARRLSSSC  
VASTCAQNDVKEESCRSEHFLKEFVLI SDWSYREAYEYGDSNDWDRGSNNTARRKNATREST  
ATLKAWLNEHKKNPYPTKGEKIMLAIITKMTLTQVSTWFANARRRLKKNKMTWEPKNKTDD  
DDAMVSDDEKDKDDMDPKSRDHKVQGH PENHCIFKCGKERGRGSLFFRVVSVTASALFWS  
YFVASSMCEQVNVSRRLFFRIPIYFRLPNFRGEKKGSTTLRDS SLPVASSHVSFRLVGRIAYP  
LCELLIQFEYYEIQEDNLRSSSHISSWILMFDRQWLVASAFMARKGTMDHGRLAGIFN

### ***Nasonia vitripennis***

>irx1\_Nasvit

MSQFSFRGSPSLQCPVTVSSSLTSSSASPVSGLLSSASATPGSTTSGGTTTAHHQAPQQPHH  
PLGVRMAVTSAVVRPPGGSPTAVASVSPASQTSGGPPTAPQPASSGPTPGRCCDTGRPIFTD  
PITGQTVCSQCQYELLGGYQRLGALPTAALS MY SAPYAAAAAAAASEGMAAYFPGLGAEQAPF  
YTPTAAGLDLKENLGAGAAAAPYPSVYHPYDAAFASYPFNGYGM DLNGARRKNATRETTST  
LKAWLNEHKKNPYPTKGEKIMLAIITKMTLTQVSTWFANARRRLKKNKMTWEPNRNVEDD  
NNNDDDDSGRKS VDEKDR LSKDSGTGSSEEDGDRGTSDRHRLDLLHGGGVGGPGGAGRAESE  
WESRADSGPDSPECLYDQREPPSRHHHPTLQLQHHPAFMAAAAAASPHHHARLMQRHPSPE  
NTSPGAHHLHHPGVI PSSTSTSA TTA SATTKPRIWSLADMASKDGDQPS PNSNILGSPYNSN  
SGGNGGGKIVSPLASRLPPHHPHPAMHPGSQFVRPHPDFYRNFYGGPHLGS GDM S LLETYQ  
RTLGG LGGVMPPTSAPGILASSASSTSANL KSHFSINGSGAGAGPGG P SVLLTTASSGVSP  
SASSTASSNGSDQSPGGGLAPSELKSPGRV

>irx2\_Nasvit

MSEDCWAEHVGLLQDVPGATDQQQHHPQPPPPVPDFLMLPHSHHHELLVSGGQPTTATSPSM  
SSAGALSPGALSPSSTATATTATTGGGSSTTTGGASTPVGAAGGGTTTAAASATSSGPGCCEN  
GRPMMTDPVTGQTVCSQCQYDSAARLALGAYPRLGPGATSYSSYPTPTPSGSDQGPYPSIGMD  
SSAFYSPLGNPYGLKDATGMGMTADMGAAWGTAALQPAATGYYPYDPTLAAYGYGAGYDLAA  
RRKNATRESTATLKAWLNEHKKNPYPTKGEKIMLAIITKMTLTQVSTWFANARRRLKKENKM  
TWEPKNKTDDEDDAVLTDSEDNKDKDDMGSDNRQDRVGDARRGLDDNEPMRHVKAHEMQHD  
KDLDEDDLDLEDDPRRVGEHPYHHSMMMMHHHHHHHQQYGPDDHLKDESLSKSDCNAAGVPIP  
ATKPKIWSLADTAACKTTPPPPSHPHHHQYQLHHQHQQQHS PGWEVVGVEPTWAPPVAVGGL  
SGFALPSSASMSPSAATAPYSSTGARYGGFLSSSSGGQLHYNPNSSSSSSASSSAAAGFPE  
VGTDTTPPQTTPNMKVTTATPNGVIQGPAGYCPGNSNTPSNGPVGSANTGHYVAAATAPSH  
AAATVGGYMQQSQANGGVGAGAGGFSTRLQNSPHKDFAPASAQNSILHQHQT TASLPPTTEAT  
TAFKPFYKGTQSMGSGFVSPV

***Tribolium castaneum***

>irx1\_Tricas

MSQFGFRASPNTQSAVSSGPSQPSPPPSSMAVTSSAPTSGSPPAPSQRCCDTGRPLFTDPLT  
GQSVCSQCQYELLGYQRLAGGVPGLPALSMYSAPYPEGMAAYFPALGADQAPFYTSTAAGLEL  
KENLAAGAATWPYPSVYHPYDTAFAGYPFNGYGM DLNGARRKNATRETTSTLKAWLNEHKKN  
PYPTKGEKIMLAIITKMTLTQVSTWFANARRRLKKENKMTWEPRNRVEDEDNNDDDDHKST  
DGKDILDSKDSGTASSEDDGRPPHSRLAPDTASEWSESRPDSGPDSP ECYERPPHPAFLPPR  
SSGSPPQISASVSSKPRIWSLADMASKE SDGPPPSTASSLYSTAASRLRLPPPGLHTAPYAR  
PHDFYRSLYGPGMAGSGSPDASLLETYSRTLQSVLTKANLATATSIASNGPLGLTTSRRL  
SPSSTSSLSSGSETPLKPVALNKA

>irx2\_Tricas

MEDGWESHV SPLVMGVGMGDMQGMGEMQTAASC SGHGQEMPPEMNMPPHHQELVASHPELNPG  
IHQEI EQELGREMGRNDRMTHQDAMGGHDDYFAHQLLVSGQPTTNSGSSPASGGGSLSPGGS  
AGVPGT LSPGGTSSTGPTQCCESGRPLVTD PVTGQSVCSQCQYD PARLAALQYPRSVGVY GAP  
YPSTDQNPYP SIGVESSAFYSP LSNPYALKDAGGTAADMSAWTSAGLQPTTGYYPYD PALAA  
YGYGAGYDLAARRKNATRESTATLKAWLNEHKKNPYPTKGEKIMLAIITKMTLTQVSTWFAN  
ARRRLKKENKMTWEPKNKTDDEDDALVSDSD DKEKDEEDKRDDTDMHGRIKSERNGKDLDD  
DMNDDDRKDDLGNMHHILGNTFGLKPEMKTSDCGVPLP PPSKPKIWSLADTAACKTTPPPPP  
PQQQQLWLSNGFALPSSRYAGSGFLPSHCQQGFPEVQTDTPPQT PPSMKLPSVAGNLP CIGT  
AAATAANS GYSQSGFLGGFGR LQSPHRPPPPQAQMTAPT TDSAAFKPFYKRWMVAGGPPSPE  
PMGKVQQIQIVWSKGASSGGHFLPTTGGRHGNSSKNATVVVQFTSKTWNTVFTDQMGNGLGE  
TGGRSLVLFNPPPARPPEGKNAPQEGTEKEDSSETPTAAPSHCPTPLHPLGRLAKIRPKEAQ  
ADRNYHLVHRRY GSGATGFFATRTRGAS

***Apis mellifera***

>irx1\_Apimel

MAKTQFEPGSWC PFPVTNI PRCTAWGVAMIHR SRCTAFMPDRMSVGRIDIVQGDKVCRSSVC  
NVDRDKDSVRLCSGCVPHSKGFNESVVDNEITHGTTCPVTVSSSLTSSSASPVS GAILSAG  
GSSLVSVASTATNHPLGVAAGLSNARMAVTS AVVRPPGSPTTSVSPSQGHPPPTTGGPTPTG  
RCCDTGRPIFTDPLTGQTVCSQCQYELIGGYQRLGALPTAALSMYSAPYAAAAAAAASEGMAA  
YFPSLGAEQAPFYTPTAAGLDLKAENLGAGAAA WPYPSVYHPYDAAFASYPFNGYGM DLNG  
ARRKNATRETTSTLKAWLNDHKKNPYPTKGEKIMLAIITKMTLTQVSTWFANARRRLKKENK  
MTWEPRNRVEDEDNNDDEDDSGRKSVD EKDRLDSKDSGTGSSE DGERPAHRMDLLGTSGGST  
GVQGRTESEWSESRADSGPDSP ECLYDQREPPRHPLQLQHPAYLASSHGRLLRHPSP ESTPP  
SSHHVPPSTTTASSTGSVTTKPRIWSLADMASKDGEQQSPIPTTMTGLSSPYGGSGGAGGG  
VAGGGGGGGKLMSP LASRLPPHHPLAMHSGAQFVRHHPDFYRNLYGASHLGS GDMSLLETYS  
RTLGLSGVMPPSTAPSILTSSASAVSASGK PFSINGGSTAPGGAVLLTTATSGLSPSSSST

ASSGGSDQSPHPSLSSTQELKSPGRV

>irx2\_Apimel

MDISEDWEHVGLLQEVSAAEPPPPPPAPDFLIQQQELLVSGGQPTTATSPAMSSGGALSPG  
ALSPSSTATTTGAAAAAASGGASTPVAGATGPGCCENGRPMMTDPVTGQSVCSQYDSAARL  
ALGAYPRLAPTATSYSSYPTPTPSTTDQGPYPSIGMDSSAFYPPLGNPYGLKDTTGMGMTAD  
MGAAWGTAALQPAATGYYPYDPTLAAAYGYGAGYDLAARRKNATRESTATLKAWLNEHKKNPY  
PTKGEKIMLAIITKMTLTQVSTWTFANARRRLKKNKMTWEPKNKTDDDDDAVLTDSEDNKEK  
DDLADGNQGDRVGEEARRGLEENEPMRHVKAEHLQHDKDLDEEDDLLEEDPRRGEHPFHHA  
MQHHHHHHQAYPGEDHLKDEGIVKTDCSAAGVPIPATKPKIWSLADTAACKTPPPPTHPHHQ  
QYHHLHHHQHYGQQQQQQQQHQQHHMPSQGHHSQQPWLGGAGGGNLSSFALPSSASM  
SPSAAATAPYSSAATRYGGFLSSSSGGQLHYNPNSSSSGSSSSASSSAAAGFPEVGTDTPPQT  
PPNMKVATPNGVIQAPTAGYCTGNGNGNAASNGNPNPYGQSHPAAGYLSTSSGSASSGSSF  
SSRLQASPHKDYSPAGQNSILHQHTTASLPTEATTAFKPFYKGSQSMGSGFVSPV

***Bombyx mori***

>irx1\_Bommor

MDLNGARRKNATRETTSTLKAWLNEHKKNPYPTKGEKIMLAIITKMTLTQVSTWTFANARRRL  
KKNKMTWEPRNQDGKDSGTGSSSEDGDRPQQRLDLLGQRTSEWSESRADSGPESPEPYERP  
IHPAYQHLPSRAPPGSTPASAKPRIWSLADMASKDGESPAPPSSASAFYQSAAAAAARLA  
HPYGRPELYRGLYPPTHADVALLEYSRSLALANPAPAPPAPSPSSSSTSSVAEPPPPRA

>irx2\_Bommor

MAQFLHQLPMLPAFGLLNGARDAGVSGLLDNVRPPAWQSSSTSLCFHSNPYALKESGGEMS  
AWTSAGLQPSGGYYPYDPTLAAAYGYGAGYDLAARRKNATRESTATLKAWLNEHKKNPYPTK  
EKIMLAIITKMTLTQVSTWTFANARRRLKKNKMTWEPKNKADDDDDTMLSDEEKDKDDQDDK  
LKSHKVKWAAPRPKFHITRLPFVGRGTGCHAEVAFGLSDELPHYFMFLPKDLSSSWIVSFMRI  
RRKVNRFDSISRNYVECNHKIQTRIRHARTRCEHNINPKRVNGKRVERTTAAIDVPIRSDL  
TKTFAPIKFPFILFIAPPAIGAELIHITWNRCIHRQCVSKDLFCHVPSGFGMNSPPLCFPS  
AMTCPSNEACGEYFMEGSLALPLALLTSMSDGDHLPSSGGPYARLPTKAIKNVRHETLDFN  
KGSTTKIHKREKRIHQRTSCYFHDSSRLRYVFFVTSINRRFAYSIGIPDEERKGDMLQGMH  
HQLLSYGIKEESKRTSDCGVPIPASKPKIWSLADTAACKTPPPAAQPWPQHSYGPPERAAPI  
DGSSNGFALPATAAASPASGSYGRYGGFPQSQYSGQHPCVHPAAFPDVQTDTPPQTTPNMKV  
PSVANPLGSGGGSGYCFPRHQQSPQRDPYHNPHHAPTNNHQPNNQPHHNEGSAAFKPFYKR

***Pediculus humanus corporis***

>irx1\_Pedhumcor

MDLNGARRKNATRETTSTLKAWLNEHKKNPYPTKGEKIMLAIITKMTLTQVSTWTFANARRRL  
KKNKMTWEPRNRVEEEDNNNEESGRKSADNGKDPDSKDSGTGSSSENGERPNNRMELLDRPC  
GPVDTASEWSESRADSGPDSPECLFERQQQLHPAYQHLQHPASRLHVPSSSSPSGPPKPRI  
WSLADMASKENDIHSSPSTTSAFYATAAGKLISPLSRGAMPPLSVPPGSYPRPPPHEFYRSL  
YGPAAHLGSAASESVSLLLETYSRTFGGGLEGGGPPAAGPGGQLSIVLSKVAAAAAATSGNP  
TFNLNGTRPTQSVATGASSASSSTSSSASDHQQPLLPNKQIPDHLKTPAGKP

>irx2\_Pedhumcor

XYSAGYDLAARRKNATRESTATLKAWLNEHKKNPYPTKGEKIMLAIITKMTLTQVSTWFANA  
RRRLKKNKMTWEPKNKTDDDDDAIVSDTDDKDKDLSYDSEKVKDRLREVDKDSMHVHVKME  
NRIIDKDLDDDETDDEDRKPDGLTLTHHHIHHHHNHMHHSIMGGMKEEMKIQDCGIPIPAT  
KPKIWSLADTAACKTPPPSQQQSWLMPNNGSGSGPMMGLNSFALPSATSSSAAAAAASYSRY  
SGFLGHYNGNNHSTMGNYNTPSGFPEVQTDTPPQTTPNMKLPVANNIINSNSCFGSSNNNT  
TSHHHNQHQHQHQHQQQQQQQPQSTSYHHNVFVNNFNRMQSNQQQQQQQQQLSPQKDRHNDY  
QHQQQQQTMRTTGNPQHQPVPNPNEGTTAFKPFYK

***Acyrtosiphon pisum***

>irx1\_Acypis

TTSLVQPLPQPPHTSSSSSSSSPPLQLSLTAARRHTSVSPQPPSSSTAAGHNSSPPPPHQRS  
TVGGSTTASAALPPSSTAPSSVGGSPPTAVATVSTSTAAAAAAPPRCCDTGRPIFTDPITG  
QTVCSQYDLLSYQRLAASGVPALSMYTAPYPEGMAAYFPALGSDQPPFYSAAGLIDLKEN  
LAAGATWPHYHSVYHPYDAAFYGFNGYGM DLNGARRKNATRETTSTLKAWLNEHKKNPYPTK  
GEKIMLAIITKMTLTQVSTWTFANARRRLKKENKMTWEPRNRVEDEDNNEDDRKSPDPKLD  
CKDSGTGSSSEDGDRPGANHTGSEWSESRADSGPDSPELFDPPPHFLHHPYHHGHYPGA  
PHPPPSHLGHHHHHHHPSAAPPHHRFASVSPPTTGGVGGGLLP SQSSAPKPRIWSLADMAS  
KDTTTTTTAAAVETSTPSTPPPPSPHQHQRSPPHQQLSPPSVGGASSAGHRRPPAVPVPS  
LPAGYARHEQLYRSFYEDPAAAAYHARAFGGGGIVFQPSAAHQHLLHHHHQQQLHSAAAA  
VAEPSPASSSSDAESVVAVQHAERA

>irx2\_Acypis

SAMTAESVSPPLAAGGGGGGLSPDVMGAAGCGTCCTAATVGGVTGDRNGGSESAVAVCSCHL  
AAAASLPPHYASHRSTPATTAVYAPYSTDQNPYSIDTSSFYPHLSNPYGLKDISTGSSDMW  
SSASLQ PSTGYYHYDSTLAAYGYSAGYDLAARRKNATRESTATLKS WLNEHKKNPYPTKGEK  
IMLAIITKMTLTQVSTWTFANARRRLKKENKMTWEPKNKTD DDDDDDDAGSSDCEDKDKDDMLM  
GDEKHCNKDVRKDSHGDHMMGQGVMSDGD DDDRK PMLQHLYPDQMHHMKVHHHHVMQDDHHQ  
DCGIPLPPTKPKIWSLADTAASKT PPPGHQWP NVISPLASPGFTMPNTSSLSPSGSSYSRY  
GANGFYGSGYNGGNSNSSSSSAQQMAGYPDVQTDTPPQTPPNMKLPLSASSGQQQQQFGGH  
QGTYNGYHHQQQQHQQQQHNSYHHRQHVPPIQQQQQHDVVRSAQEVQQQQQQQQQQYHQQ  
HVALSQHNNNNNNSNTNNNNHQMAVVANDASTAFKPFYKTPSQQPHQQPHQQQHQQQHRQM  
NGYVSPV\*

***Culex pipiens quinquefasciatus***

>irx1\_Culpipqui

MENLERSRLSYCSPMSSNGSTLEKTTFNDFSYIIHLASPF EAMLAPSVGYPTVVLLERRKLR  
KLLRLLEYIR TGNKLVTP EGNMLLFRLVVSAPSLSPTRLLSEPYHDQNRMAPKALHQAPQLT  
PPRSYGMDLNGARRKNATRETTSTLKAWLNEHKKNPYPTKGEKIMLAIITKMTLTQVSTWFA  
NARRRLKKENKMTWEPRNRVEDDDVNLDDDDDDNKSLKDDKEILD SKDSGTGSSSEDGDRPSR  
LDMLDRPGHSDWNGSRNGSGPNSPDIYDRPMPGHPLLHPSHFVHLRSTIGAHPDVSHTPSG  
STNPSKPRIWSLADMASKENKDS DSSHSTGYSPGKIIAPLAGRGLNPLHHHPYMRPEFYRN  
LYGPHLTPGSPEVSLLESYQRTFGATLAHNGIPVGINPLISKASGSGPPFAPLSLTTSGNPH  
VAPQPGASPASSTSSGPENLTPSSPAAEKLISVANSSKP

>irx2\_Culpipqui

MQSSLSRMRETT SQFVQVVDHTHTPCHGGCLDGGNSSTTPYRQTTTPATKSETARRKNATR  
ESTATLKAWLNEHKKNPYPTKGEKIMLAIITKMTLTQVSTWTFANARRRLKKENKMTWEPKNK  
TDDDDDDAMVSDDEKDKDDMDPDKSRDHKDMHHHVKA EHDKEDDDDDLTD DERK PENLMGHP  
GHLGQHHPYHHSMLGGHHHAGLKSELDHPKNQ TGS DCGVPI PASKPKIWSLADTAACKTP  
PPHSALHSSWMTGGYHPGQHHQNQQGQVNQQQQQH QHPHLLQHPASGMMGGESSPMSMNM  
ANTAHSQGMGTMGSGMMN NFVNTPYSRHGGFLTGAQHYN TTHNNNTNSNTSTGQVTDATTP  
LQQQQQPPQQQQHPLQGMHQHQQQQLQQSQQPMNSNNSQSMGFPEVQTDTPPQTPPNMKL  
PSVAGNLLTVSTTPTTGTCFNNGQNSAGSINNNNNLTPNNNNLNQANGYASSPESMGQSSQ  
QGQNNYRMQSNSPQKSQQDYSQQMLHQPDGFKPFYKK

***Daphnia pulex***

>irx1\_Dappul

DDRSLRLMAASASAAAVSTTTPIVLSSPRTPTTTLTASSGCCCDGSRPLVPDPLTGQSICAC  
QLESGSATSTAAMLLGLPRLSGSLAGSTTTTTTSASPGATSALGLGLSLYHPYHQHQQQQQ  
QQQQHDLVHQHQQAIAAAHQQQQQQPF LTPDQSSFYAAANAGHDLKDSALAFNGAAAAAAA  
AGWPYPSMYYPYDPAMAAYPFGGYGMDLNGSRRKNATRETTATLKAWLSEHKKNPYPTKGEK  
IMLAIITKMTLTQVSTWTFANARRRLKKENKMTWEPKNRNDGDDDDGDSSDAEPSKDHHKR

SSSDGRDGVLSADSNAHHQRAWNGIGSAGSGHHLVMDDHHHQQLHRLHQHRRHHRDSEDN  
IDVMLDSDEEELDLLSSGGDSACLSPADHHLPGSHHLGNHLGNHHHLGLGVASTGVPHS  
SSSSTTTTSTNSSKPKIWSLADMAGSQPSHQPPASGSPHTTAAAALIQQQQQQQQQQQQQ  
QAAAAA AVAAAVFPLPFGPLSQAFGLRSPHSSFLPPNNNNNTTPGGGKIFSSFS PRLPPTS  
PYLDAVGGSPYGRPTAAAAAGVYRYP PPPPAGNPASSTSPFGGAMRSSAGAAAAAAGSAG  
EATSMALAYNQLMSSMAAHFQQQQHLQQQHHHGLVAGSNASAAAAAAGKMSGSTSSATSP  
GVLENLEKLAALAAGASSSSSSSATNRNDMKSSVAGN

>irx2\_Dappul

LLMSTGSPSGGTASSSSSSSSSSSSAAALAALPGAASPGSGGDSVNATDGPATTATATTTT  
NANNSSNHSASAGSGSASPCCDSGRPLVTD PVTGQTVCSQYERLQALQNGLAAGYGPAAA  
AAAARLAAVSSAVTGVTLGHGVYSAAYPSSDQNPYP SLGMDSTTAFYSSLTNPYSLKEAGTG  
GGDVSAWSTAPGLHQSAQGYYPYD PALAAYGYGASYDLAARRKNATRESTATLKAWLSEHKK  
NPYPTKGEKIMLAIITKMTLTQVSTW FANARRRLKKNKMTWEPKNRNDDDDDDCGESGRS  
DDESSSPVHGKQQHQSGTHNKKMKH SKIDKDDGDDKSDCDDDSRGSVSPHSIGSNLNLHLH  
PHHHHHHHHLVHPSHHQHQHGGSGDVS VSVSVSNLMNNTYHHHAQQMAGYAAAHQHGMMD  
MHQQHQQLSSPTSSSAKPKIWSLADTAACKTPPPPGHQIAGNSSGGSSGSSGSSMMAA  
AMMHPAAAAA AAAAAHHHHHLLAAVGPANHHSWFSGVNGPMSSMATMTGAGSSAMMNGMS  
NMAAMNAKMAAGFGSYGRYPSLTGYGNSAGYSSASAGSASAAYNGYTDVQTDTPPQT PPNL  
KLNANSLGQHQYHPYVSPQQQQQQQQQQQRLSSMPLPPTMSGLSASAVDPSEMPSPGSAS  
ARSSQQQHSNL PMAAPSTTPSASSTSSAMM TSV AQPQQQHGSPGSGGESSSTAFRPVYRTS  
VEWTRGQQQSGAFPTDDDTLDTHQINSVPLMK

***Calliphora vicina***

>irx\_Calvic

MAAYTQFGYGSYPSANQLLGGNVSQTSAAALLSSH NAPSPLSGTHENSLSPSGNSSASSSS  
VSSSGGTTNGPLSPGAMSQTSTNHAGSVLTSNTTNATLAHALVNGPEGTTAAATASSVLA  
AAVAAAAGGSSANHSPSGGGGVGSGSGGCCENGRPIIMTDPVSGQTVCSQYDSARLALTN  
YSRMPTGGVGVYGTAYPSTEQNPYPSIGVDSSAFYTPLSNPYSLKESTTGSDMSAWSTAGLQ  
PTTGYYSYDPTFAYGYGASYDLA **SRRK NATRESTATLKAWLNEHKKNPYPTKGEKIMLAIIT**  
**KMTLTQVSTW FANARRRLKKN**KMTWEPKNRTEDDDDAMLS DDEKELEKTDKAGAGGNMYG  
QQMLKEHDQLKNNHHNVKHDLDKDEEDRKPENLTASRQLENYNTASLYGTTTGHTNAYHPY  
QSQQQSQSQSQSQQQLQQHHSQSLYYQQQQQQQQQGYLANPASTIRDECG **IPI PATKPKI**  
**WSVADTAANK**TPPPNQAYMSNSQQQQLAAQSYANNLQINNHLANTSPLSMSSYVNAAAS  
SPYSRLNTAYPAASN YAATAGQMNNNSNTSANMMHLTQQYSAQKGHSQGFPEIQPDT PPNMK  
HANSAM

***Spodoptera frugiperda***

>irx\_Spofru

VDSSAFYSPLSNPYALKEGGGEMSAWTSAGLQPSGGYYPYDPTLAA YGYGAGYDLA **ARRKNA**  
**TRESTATLKAWLNEHKKNPYPTKGEKIMLAIITKMTLTQVSTW FANARRRLKKN**KMTWEPK  
NKTDDDDTMLSDEEKDKDEQEEKIKTHKDEERKGD EMLQGMHHQMLGYGIKEESKRGSSDC  
**GVPI PASKPKIWSLADTAACK**TPXXAAQPWPQHAYGPPERAAPSDGGSQWVALPATA

***Heliconius erato***

>irx1\_Helera

HEGPTYQDPITGQTVCSQYDFLNYQRLASGVPLSMYSAPYPDAATAAGMAAYFPALAADQP  
PFYANTAAGIELKENLAASAASWPYPTVYHPYDAAFAGYPFNGYGMDLNG **ARRKNATRETT**  
**TLKAWLNEHKKNPYPTKGEKIMLAIITKMTLTQVSTW FANARRRLKKN**KMTWEPNRNVD  
DNNNDDDHKSNDGKDALDGKDSGTGSSE DGERPQQRLDLLGQRTSEWSESRADSG

>irx2\_Helera

HEETACSCQYD GARLALTSY PRLSSAAVGVY GAPPST DQNPYPSIGVDSSAFYSPLSNPYA

LKEGSGEMSAWTSAGLQPSGGYYPYDPTLAAAYGYGAGYDLAARRKNATTESTATLKAWLNEH  
KKNPYPTKGEKIMLAIITKMTLTQVSTWTFANARRRLKKENKMTWEPKNKTDDDDNTMLSDEE  
KEQDDKIKPSKDDERKGDELLQGMHSQLLGYGIKEESKRGTSDCGVPIPASKPKIWSLADTA  
ACK

### ***Capitella Sp I***

>irx1\_Capsp1

MSFPTLGYSCSPPGSSSSSLGSPQLLLPGALPSSAASSCEASAEPSSLSRSSADQEALTPSPA  
PHLAPASLPPTMYSAASSLLSYGPAARMLSDSVYTSAYAAQGYMPFGADPSAFYSPLVTGG  
DNSEAWRSLASSTPGWPYDPSNMTGYPYGASYGGLDVRKKNATRESTSTLKAWLYEHIKNPY  
PTKGEKIMLAIITKMTLTQVSTWTFANARRRLKKENKMQWSPRNRAGDDDDDDKNSDDDDDDDK  
GDSNNNDDAKRLTEEDEDVVVDGVFTLYECIFDANDFSSTQSLACPLAAIATVEQRDLWEL  
DIRGKAQLSMRNRGGRNCCNITSNDDSLSTPPRADLMNGSSLLHPHQRCFDLTGLHKDVS  
SSLLSRPTPTQPCARLQGLAASSSSSSSSSSSAHLSLTSPLANSEFGANPHKLQAEDKPRI  
WSLADVATSSTPPSVKRPSPPPSSLAGLHGVDNRSSSHLITEAREI ISSAITQHI IHRSTHR  
YDTPADVTTQNFNNLRTPDRVGPDRVMTPELHDCAVKLSDFADDDSEATLTDGWAKYALKIK  
RNCPALIVTTIGSPLIKATFPCVRKEVRKKYGRDQVEKHSSSITQLTCLQRMIDTFTRELQ  
ISGQHTITTFEQRNFTDRGLSKTAADTPRRQGDKPALPVFNEPRTWEISPRKTRYHGCQWQ  
RRRYNGG

>irx2\_Capsp1

MKAGMSLSPSMCALPPYDIHGSYQYLSQAYASLDPRRKNATKESTNTLKAWLYEHKKNPYPT  
KGEKIMLAILTRMTLTQVSTWTFANARRRLKKERGGWTGEDDDDEEEVEVEKEEEADEEEA  
RLRGDTPNPTAPSPRLSVVPITPPSPPTTGQDRLSAPSKPHTIDHLPDRNQPAEPQKKPSI  
WSIADMVQSSSSTSGQEKREATPPNVTVSP TWSARDFSQHPYAHPYAMRFPHSVSTPDHT  
PLAPFRHPGLIIQPSNQLR

>irx3\_Capsp1

MAFPQFGYPNIGASLPGNQNSLLLAASAVNAPSSGASSRHTEAPNRDAPASSTPSSTAAQC  
PCYPPGLIGSYPRMPGGLPEPNPAAAAATAALYGGAYPPGYLSLGAGEAVMNSMCGDLKS  
TPELGLVPGSPYFPAYELAGFPYHNGFALDPNARRKNATRESTTTLKAWLNEHRKNPYPTKG  
EKIMLAIITKMTLTQVSTWTFANARRRLKKNKVTWSPRNRGEDDDDDDDDENGRDKDEKDEE  
FDVDIENDDDAEDSPLPRSSNKAEMSPLPSSPPPVAYSTHSAFTPINHLRSPPKQPLRVSTA  
TPNKDSASSSPSSRSTKIWSLAEVASSKEHKTEETNTPAFVTRGPTQOTFAPNQKAPHAAGFS  
AFRPLLHGVPQSLAGGPIQWPGSQAGGPHPAYSYALSQHYLAMTMARPGFIPASFHHPQDS  
KLAGVR

### ***Helobdella robusta***

>irx1\_Helrob

MKCGSRYGSLDVRKKNATRESTSTLKAWLYEHIKNPYPTKGEKIMLAIITKMTLTQVSTWFA  
NARRRLKKENKMQWSPRNRRTGEDDDDDDDDDKHSNDNDITQNGEADMNRKSLDNDDDDMM  
MTRESDNFTDDDIRCADEEDEDIVVDAGIDDLVPDVPVVTNKTISNNNCCNQNNNSKVSS  
SPSYHHNQSEYSRRSRSVVVSPMNVDNELQQIQQHHKQHFNQLQHQQSLHHHLSQRSSQHDP  
GNTSNTNNNRNNNDSDNNHKTNRENSPKFTQICHNFHPHFNRPSPFHMNNIHHHPSFHPSIT  
FPQYPQPSFHHHHSSPSFYPMFLTNKRKFGDKMEDEGHTLNKNPNNINNDHNKNNNNNS  
NNVDHSNSNATNNKSKDGSYTDVAVRKETEVDNDDDDNSKVDIKMDSDPSETTSITTTTT  
TATKAAATTSNFPSPISRVPKQDNITSECKKPKPKIWSIADVATSDDNKQRNNNKNTENV  
DGDKEAPDGLNSPVQQPHQHLNAPYNMHLYSTLSQLYHPYFSQQHRQRMQVRFQQQLPNN  
YHQQFQQQQQ

>irx2\_Helrob

MESSCLFSKSKFTSYLDNANISNTDINNTIYNDINTNNNINNYNNINNDNVNVNKFDPNILT  
SYNLWQNYATTKLPYNWVAISQQQQQHQQQQQQTTRSICYDQQQQQHQRQQQQIPTTTKPTPT  
TCFSSCKIPTYNPPSSRLKKEKKVYWLPRNRATRESTSTLKNWLNEHIRNPYPSKGEKIML

AIITKMTLTQVSSAIKVSTWFANARRRLKKEKVVYWLPRNRADRSNEKIYNDEDNFACCHHC  
SSSNDDDDDESDDDDNDDNNNNNSNINNNSSSNILNTLTNTTKNASIKDFSLOISYINDGSHI  
SNNINPHNNTITSNNINYSNNFNGNNNNIISTDADDARNINSISDDDISANQPCYNNKIDSIN  
FNPHTSNLTSDDKSDDDKDDSDDDDDDDDDADDKNSNNKKQRPDECSSSHSSASTKYFLKN  
KPDYNLSYNYFYANNFSAPNNINGNINYVDIKLLTADINSRIFSKLTPSSNDSSSKDNINTC  
DISTSIYNSSTLSSCKYNGLTRNNVNNIKTRNTVNGNINEAHMNSNINNNYNNNNRFII  
DGTKNINNNITNTDDINSYDVNLSYGANNNNINYSINNTDYNKNKNI FLQSVSTT **FDNLKP**  
**KIWSLAQVAENE**QQEHFLGNEFATRELLSLPYHQLNYQQPNYLQQQPQQHQQQQQQPQILNN  
HFYYNENRYSANNEHNSPIEIDNKNLNSTAEVENNINNIDNNISNNGNKINNIRDIFLNNNF  
IQTLANNNTSIGQADINNNNNISKNNINEDDDDDDDDDDKIIDENANEDNDNDGEYDNDINS  
SWSPSFSSSSSSSLSSATCSDKMDPKFF

>irx3\_Helrob

MDNKSIIINNNDGHNNNNNNNNGNDIIDNDNNNNNSCDVIVNNLQPYFYPIKPNFLPSLPH  
NYNNHYIANVINNSNNYNNYNSNNINFNNYIQNNSITPSIINAYTPNNHIQNNLNPNNYS  
QNNNYNYISD **PTKRKTVDRESSATLKTWLASHGKNPYPSKHEKIALAIATKMSLTQISTWFA**  
**NARRRLKKETNN**NNNNNNNNNNNSNNCSSSSSSNSGRIIDNCENKSGDDEDSNNNNNNNSNDINY  
NNNNNNNNNNNYTICYDDVNETVTSTKEDHVITVASSSFSSSFSSPSSLPTLSPSSPAAAV  
PSSSSSSSSSSSSSSLSPSISSSSSSSKKGNNNNYDNNNNNNNNNNKNNNNNISDSAD **CKNRE**  
**IKIWSISQLLSND**

>irx4\_Helrob

LNQYIQKKNRDENNLTQLNE **NELNYKKKTSLQAWLYEHIKNPYPTKGEKIMLAIITKMTTQ**  
**VSTWFANARRRLKKENKMQ**WSPRNRGTDDDDDKSINSDDNNHNSHNNNSTSTNNSSSS  
NICSNNTSSSSMSNIGNIKDYRINSSGSSSKINIGSSSSNNNNNNNNNNNNNNNNNNNNNTNN  
NSGKIYGDNDGKHRDDETIIVVDNIVGDDILMSVSDRRKYTGTSLNRMAGSDMTSYLACNS  
ISANKLNSVMTNNNNNNHNNNNNNNNNNNNNNNNNNNSLYRFSYLSSSSSI FLNNNSNNNSQL  
QHQQHNSSTSSSSLQQQQQQQNNPLTTTSTPQQQQQQQHFNPLPSCANNNNNLTSPSSSLY  
DSSPPLSAYNLFSSQPTPHNFYHSSPFI SNPYINPHNNINNNNNNSGFSQMFQSRDYNQ  
YLSRANFHNNNNINNNNSNSNKHSSSTSNNSTNAYVSDDDDNKNSLNSGSGSCNYGNVSS  
LL **DGGLKPRIWSLADVATSAG**GDQVEATSVSGYSIDENIYSSNNNDDNNTDNSNRNDVID  
NNDINNNNNNNNNMNGNNINNNNSISMFNLSLNNQH HHYHFPTNHNYSHYFYSSPHVTS  
IFPSSSSQSSSSSTSSSASSFVMKQQGK

>irx5\_Helrob

RSYDV **RRKNATRESTTTLKAWLYKHIKNPYPTKGEKIMLAIITKMTLTQVSTWFANARRRLK**  
**KENKMQWSPQR**NDDDDNDDDDDKNSLMSADDNDDDDDEDDKVKKRSEAEAADDDNDEDEEDD  
EEEEEEEEINVDAGQLGEYILRCVANKLTNNKQIMLSHDCFIIKNTYKADSTNNKINKTSIE  
NMFPDYLQQQRHHHQQQQHQQQHQQHNNIQTDDKLKPLTTTLSTEKPTMTSESENGS  
SLPEAK **KDKNKFRIWSLVDLATT**KS DSNDDVSDDDGAKTHKPKNINNNNDDDDDDNNS  
INNNKTSTDTNNSNTTTTNNENFNMSPTSNMDIHPWMHRGIPASWVFQPKIAMAIYRQMMN  
FHIQQQQHHHQQQQHNNNNNNNNKQQQPKH

>irx6\_Helrob

CILQNLFYHYITNIIIIFFVIIIIIIIPVIIIIISYGVIVD **RRKNATRESTTTLKSWLY**  
**EHMKNPYPTKGEKIMLAIITKMTLTQVSTWFANARRRLK**VSREKINEMKMVWSPSKRTNN  
GDDDDNDDDDDDDDDDADVSIGQNI DDDVNI DVHNNNNNNNNINFNNSSSSNNTNYND  
DDENDNNNNKNYDTSYAIANDNNNNNNNNNNNNNNNNNNNNNNYRNFSSNNNEKADDEDD  
DDVYNVLKVKRRRFLKEFS DTRYFKRGYI INNNNNHNNNNNSNNIPDENSRI DNNIQNI  
KNNFNYINNDYHHEFNRRNNNDNSNNDLEINNNNNNNNNNNNNNNNNNNKRICDENDDDVEM  
NCDDNNNI INKNNNNNNKKSISSDKNSSNNYNNNNNNDDSWTLCKDKSTKCS PDYDCIY  
FLQHQQKHQHQHQHQHQHQHLQQQQQQKQONVYHKSNSNNSLGYNKNE DANDDVGS DY  
DDDDDDDDNNNNNNNDNNNNNKKIIISRSVKLKFDDDDDDDEEEDVTGEINGNYDNNDLNKN  
NNNKNNNNNNNNNYDCSNYDDNNETNDINNNATEPTNYISDENNLNSGELFTKTTTTTLEI  
SQSSSSSSSSSAAAAVA AATATLLPSLSKPLPLTSSSTSSSSSSLSNNKDTLPSTKSPNL



SSSSLSRSSSLTSSASHSLFHNHQHYHHYQHRHSIHYYHHNQMLKQPQNQHRFVDENNNN  
NNN**KRLRIWSIDDVIGNRF**

***Lottia gigantea***

>irx1\_Lotgig

XVPALGDSVYPTSAYASQGYMPLGADPSAFYPPPLNGHYDIKDAGESWRGINQPAPCYPYDTP  
MSSFYPSNAYGSVDLN**SATTRKNATRENTTTLKAWLYEHKKNPYPTKGEKIMLAIITKMTLT**  
**QVSTWTFANARRRLKKNKMT**WSPRNRSGDDNDDDDDDGDKSKGSDDDDEKDEVNLKEECK  
SPVGTSPFSVTHNDHSSLFHEDTNKPINGGISCSGNLSLASSSLVGTAMGAAQSGIRTQNLG  
ATPMDTKRPDSLCSNSNDSGLSDVNCNYSDVHNL**ENGMRPKIWSLAHVATSK**AGFLPPPMGR  
GLVSNQNDHMKELSNQLWGDGMVSNRQNTYSSMSSCSLNSGMMRQEPSAFTPNINPLS  
SPNSNPVPPNINPYSQLYCPPRVPLD

>irx2\_Lotgig

MSYNLTFPPNNTQIPAAQVTSPTPTTPRACCENGRPVMTDPTTGQTICSCQYGSALLNYPR  
LPGLTSSSLFGSTAYGNTTQOSYVGLGTEGSAFYSPGGNSTGQTQDAWRSLAQPAFSYDPSM  
GLYPYGPYGGDLN**NARRKNATRESTTTLKAWLNEHIKNPYPTKGEKIMLAIITKMTLTQVS**  
**TWTFANARRRLKKNRMT**WSPRNRGEDDDSDDEKENEDDEKSKLGDKKEKKINGDGSEIRDEE  
IDVESENLDKNKKVNDNLFGLDCVSPVPSVGEDSRRLSPPVSRDSDSSFSESLNPSDCDD  
**QQPKIWSVSDFLQTT**PQKLGKPESELLSDSNGVPKIGSGMTSSFTPVASAGLNGLFSSYPS  
SLAYSSHSYPYPISTSGVGKLMRSRSPATRFNPNPAGRQPVANGFNAPRDFNVVREGE

>irx3\_Lotgig

MTTAPSAPPSGRACCENGRPILTDPHGTGQTICSCQYGAALLNYPRVPGLAESVYSASAAAYAA  
AASQGYVSLGAEGSAFYSPLAGGPYELKDGPEAWRALAQPGFPYDPTMIYYPYAGFGGLDLN  
**SRRKNATRENTTTLKAWLYEHRKNPYPTKGEKIMLAIITKMTLTQVSTWTFANARRRLKKNK**  
**MT**WSPRNRSEDGSDGLDNIIDVDSEGGKDDKDRSTPGLGDLGSRSTPAGVDDLDLTDGKDA  
FINVDEEDSDDHGYHADRLDSDEEVLRRMKGKSDSEKLCDSASVTDNHSPNKTENRDSNVQS  
GGNSTGTSSQQNTE**EQSPRKIWSISEFLHKTSTTTGTTSSRPAAISTHARPPHTSGLFYIPG**  
APNGWNGARYHGHPYSMSLSHSTISYPYSITSHANKSPLPSTATLRTIDSLKEGEKLMRP  
NVLFSPARDLDGIRPNX

>irx4\_Lotgig

MFRAPFGLGGFPAGITADGVSVLTQNCGLSGIRADRPESWKALPSTMSPHPYDPSLAFHPYN  
TFYAGLDLN**SAARRKAATRETTSPKAWLSEHRKNPYPTKAEKIMLAIITKMTLTQVSTWFA**  
**NARRRLKKNKLC**WDSADDKDDDEDDIKNIDDESRRGFDSREIDVEGLEKRLSGDESDN  
QLDLSDISDTENEPTDNKNFKLQSRLLPSSQLRIPDNILVNKPVNTSNN**NGVSKPKIWSISQ**  
**IIDKDT**PKVPVQQPVFTHYNGLHHTGSRFPSPFVDPYGARLQMHIPGYNQEKLPSPRTLDTTP  
DTPPFSISTKEIISPIKLNAAATPEHEEALNLKTERPETQOTSX

***Schmidtea mediterranea***

>irx1\_Schmed

MSSGKEGRPTWNSALLLEEFRLFSTMTNTVQISLSGGIPDQINPIFNYSSLQTQQNNDPSSL  
LNLYNPAYAAAAQSRLLSSLHPSTSPNHSNINSTDTSTVSSITSAEQPPAPTFGPDSISPNT  
NIPFYSSPQFTFNNHLCCDFGSAWRSAAHMAADHNPYATYDNSAWANPYGYIGNPTLDLN  
**SARRKNATRESTTLKAWLQEHIKNPYPTKGEKIMLAIITKMTLTQVSTWTFANARRRLKKN**  
**KMT**WSPKNRSDDATNSDQETDTKCKETDSDDGLKTDQDLTSLSDQDDLAMKSSFPSK**LNDVK**  
**PKIWSLAHTATAGL**FSMPLQSYPGHCTDGS AEDPQNNNSINQYPANIGMPLISSHPLYQQGF  
FHHIDLPNQLNGCQDNKQYSHLYHQQNPNNFFNHSQKRSEML

>irx2\_Schmed

MSKTIITSHSTSTSCSGTIRKLSDDTAMSKLASIVEPIFHSPTMNRHLLTQTSWPPGMHSNIHPS  
NMFGLMNRINSSPPLRQWINVSNQNHQVPSSAAFATQLPPARMINSESPLNASNNQMLMDH  
WETWRQIHQATINNNLSPHFLALCQSSGITFNNNENDNVSNLIYKNIYVSFSIRYPPDF**PNA**  
**PRRKNATRETTISILKAWLNQHKKNPYPTKGEKIMLALITKMTLTQVSTWTFANARRRLKKNK**

MTWTARTRHEDDI DETGDDDEDDDDDEEDNENDDDISKSDSRFESELRKNDESFLSKSEKSDT  
SADETSKSNKIWSIAE IADDN YSGSNSRQHSNFSVLPTPMNLFRLPTGLNQYSDHLKLLQSM  
TMTPFPSNIPVPIHHTYRNILKSWSVLNLNTLNNSDASSWQPPLNLNSKLSNKDPNKDYSTI  
SETHKEIDRFSDQSSPVSLNKDS

>irx3\_Schmed

MNSHPRRKNATRETT SILKAWLNEHKKNPYPTKGEKIMLAVITKMTLTQVSTWTFANARRRLK  
KENKMTWSPNQKSEDEADDDLEDTSSDIRSRLQDDPASLTKNYSKELKNEFLSKLSAINNLS  
ADISNPKINSNVT SKSTKPKIWSIADITSDNVEFSQDKSSNSLASSNEKDCQIYSSDPLKN  
ITTQNPAVQFL

>irx4\_Schmed

MCLPFRLLDVCVQTQATGYKYNVLFVKQNGNLMNCLKNHEEELRDRNLFSTYYNCSRYGGIPP  
EHIILANKVTGFLAMNDPNMDIRSQDVLENWRQFHQAALANNLNPIITLAHLHTINHADVNI  
QVKKNATRENSSTLKAWLQEHKDNPYPSKGEKILLAILTQMSTLTQVSTWTFANARRRLKKNK  
IGWIANGKSDNPDSTSDSELSELF TREYEKPNNSNQKITKKNHIWSIIDMISEPSCSHEDPA  
T

### ***Mytilus californianus***

>irx\_Mytcal

MAFAHQYTHAGTASMPGSQVMLSTKSHSPTAPSTMEQARALLHESGLPLLHFLPRMNGLPES  
LYGQGPLTSNGLGVEPSAFYPMGSPPGH LTGSPEWKGI PGQSPVVYPLDPMLACHPYASFYG  
GLDLNNAARRKNATRETT SALKAWLYEHRKNPYPTKGEKIMLAIITKMTLTQVSTWTFANARR  
RLKKNMTGWNGKDRDLDDSDFETDGDERTNENEGQYLLPIG

### ***Mus musculus***

>IRX1\_Musmus

MSFPQLGYPQYLSAAGPGAYGGERPGVLA AAAAAAAAAAASSGRPGTAELGAGAGAAAVTSVLG  
MYAAAGPYAGAPNYS AFLPYAADLSLFSQMGSQYELKDNPGVHPATFAAHTTPAYYPYGQFQ  
YGD PGRPKNATRESTSTLKAWLNEHRKNPYPTKGEKIMLAIITKMTLTQVSTWTFANARRRLK  
KENKVTWGARTKDQEDGALFGSDTEGDPEKAEDDEEIDLESIDIDQIDERDGDQSNEDDEEDK  
AEAPRARVRPPASARDQSSPLSAAETLKSQDSPLGLVKEVSEPGSTRLLSPGAAAVGLQGAP  
HSPKPKIWSLAETATSPDGAPKASPPPPSSHASAHGPPSGSPLQHPAFLPSHGLYTCHIGKFS  
NWTNGAFLAQGSLNMR SFLGVSAPHAAPHGPHLTAPPPPQPPVQVATGVLHGEKASARSSP  
ALPERDLVTRPDSPPQQLKSPFPVRDNSLAPQEGTPRILAALPSA

>IRX2\_Musmus

MSYPQGYLYQAPGSLALYSCPAYGASALAAPRSEELARSASGSASFSPYPGSAAFTAQAATGF  
GSPLQYSADAAAAAAGFPSYVGS PYDHTTGMTGAI SYHPYGSAAYPYQLNDPAYRKNATR  
DATATLKAWLNEHRKNPYPTKGEKIMLAIITKMTLTQVSTWTFANARRRLKKNKMTWAPR NK  
SEDEDEDEGDASRSKEESSDKAQDGTETS AEDEGISLHVDSLTDHSCSAESDGEKLP CRAGD  
ALCESGSECKDKFEDLEDEEDEDEDECERDLAPPKPV TSSPLTGVEAPLLSPAPEAAPRGSGS  
GKTPLGSRTPGAPP PASKPKLWLSLAEIATSDLKQPSLGP GCGPPGLPAAAAPASTGAPPGG  
SPYSASPLLGRHLYYTS PFYGN YTNYG NLAALQGQGLLRNTAASSPGETLHAMPKAASDT  
GKAGSHSLESHYRPPGGGYEPK KDTSEGCAVVGAGVQTYL

>IRX3\_Musmus

MSFPQLGYQYIRPLYPPERPGAAGGGGGSSAGGRSGPGAGASELAASGSLSNVLSSVYGAP  
YAAAAAAAAAAQGYGAFLPYATELPIFPQLGAQYELKDS PGVQHPATAAAFPHPHAFYPYG  
QYQFGD PSRPKNATRESTSTLKAWLNEHRKNPYPTKGEKIMLAIITKMTLTQVSTWTFANARR  
RLKKNKMTWAPRSTRTEEGNAYGSEEEEEDEE EDEEESKRELEMEEEEELAGRGGGHGGRGA  
GRRRRDEEIDLENLDSAAAGSELTLAGAAHRNGDFGLGPI SDCKTSDSDDSSEGLEDRPLSV  
LSLAPPPPPVARAPASPPSPSSLDPCAPAPAPS SALQKPKIWSLAETATSPDNRRSPPGA  
GGSPPGA AVAPPTLQLSPAAAAAAAAAHR LVSAPLGKFP AW TNRFPPGPPAGPRPHPLSM LG  
SAPQHLLGLPGAAGHPAAAAAAYARPAEPESGTDRC SALEVEKLLKTA FQPVPRRPQNRLD

AALVLSALSSS

>IRX4\_Musmus

MSYPQFGYPYSSAPQFLMTTNSLSTCCESGGRTLADSGPAASAQAPVYCPVYESRLLATARH  
ELNSAAALGVYGSYPYSSQGYGNVVTYGSEASAFYSLNSFESKDGTS SHAGLPPTAAAYY  
PYEPALSQYPYDRYGTVD~~SGTRRKNATRETTSTLKAWLQ~~HRKNPYPTKGEKIMLAIITKMT  
LTQVSTWTFANARRRLKKENKMTWPPRNKCADEKRPYGE GEEEEAGEEESREEPLKSAKSEGH  
AGKDDKELELSDLEDFDPLDAETSECELKTPFQSLDSGPERIPASSDGP GTGKEASTTLRMP  
LGTAGGAVMDGDLERARNCLRSTVVVPD SGAE GPPACEAKLTFAQAGAPPNLETKPRIWSL  
AHTATAA AATALSQTEFPSCMLKRQGPTGVSATTPASSPAVTAPSGALDRHQDSPVTSLRNW  
VDGVFHDPILRHSTLNQAWATAK GALLDPGPLGRNLGAGTNVLTTP LACSFPPTVPQDVPPA  
GASRELLATPKAGGKPFCT

>IRX5\_Musmus

MSYPQGYLYQPSASLALYSCPAYSTSVISGPRTDELGRSSSGSAFSPYAGSTAFTAPSPGYN  
SHLQYGADPAAAAAAAFSYVGSYPYDHTPGMAGSLGYHPYAAPLGSYPYGD ~~PAYRKNATRDA~~  
~~ATLKAWLNEHRKNPYPTKGEKIMLAIITKMTLTQVSTWTFANARRRLKKEN~~KMTWT  
PRNRSEDEEEENIDLEKNDEDEPQKPEDKGDLEGPESGGAEQKATAGCERLQGPLSPAGKETE  
GSLSDSDFKESSEGRHDELPRPPRAGESSPAGPATARLAEDAGPHY PASVPAPGPHPSAGEL  
PPGSGGSSVIHSPPPPPPPPAVLAKPKLWLSLAEIATSSDKVKDGGGGSEGSPPCPGPMGGQTL  
GSRASPAPAPARSPSAQCPFPGGTVLSRPLYYTAPFYPGYTNYGSFGHLHGHPGPGPSPTA  
GPGSHFNGLNQTVLNRADV LAKDPKMLRSQSQLDLCKDSPYELKKGMSDI

>IRX6\_Musmus

MAFSPFGHPYGSTSQFLVSASSSATCCETAPRPVSDVASASTSASTLCCTPYDSRLLGSARP  
ELGAALGIYGAPYAAAQSYPGYLTYGPEPPTLCGALNPQYEFKDAAGSFAPSLTQPGAYYPY  
ETTLLGQYQYDRYGGVELS ~~SAGR~~RKNATRESTSALKAWLHEHRKNPYPTKGEKIMLAIITKMT  
LTQVSTWTFANARRRLKKENKMTWAPKNKGGEERKADSGEDSLGCLNGDTKDATASQEARGLR  
LSDLEDLEEEEEEEEEAEAAVSAARRLADFQKSTQPLPAPCAAQERCLESRECGLGLPRF  
SFTTEAPQSGEADFITAEPPGPTMILHYPSGHKPRIWSLAHTAAASAVESAPSTPPRAQS  
PECHMIPRQPSIRLLVPRDSEGEEDSPA AKAFGNSTFTLQGLPLNCAPYPRRREPEVRFQYPS  
GAEAG

**Homo sapiens**

>IRX5\_Homsap

MSYPQGYLYQPSASLALYSCPAYSTSVISGPRTDELGRSSSGSAFSPYAGSTAFTAPSPGYN  
SHLQYGADPAAAAAAAFSSYVGSYPYDHTPGMAGSLGYHPYAAPLGSYPYGD ~~PAYRKNATRDA~~  
~~TATLKAWLNEHRKNPYPTKGEKIMLAIITKMTLTQVSTWTFANARRRLKKEN~~KMTWT  
PRNRSEDEEEENIDLEKNDEDEPQKPEDKGDPEGPEAGGAEQKAASGCERLQGPPTPAGKETE  
GSLSDSDFKEPPSEGRDLALQGPRTGGPSPAGPAAARLAEDPAPHYPAGAPAGPHPAAGEVPPG  
PGGSPVIHSPPPPPPPPAVLAKPKLWLSLAEIATSSDKVKDGGGGNEGSPPCPGPIAGQALG  
GSRASPAPAPSRPSAQCPFPGGTVLSRPLYYTAPFYPGYTNYGSFGHLHGHPGPGPGPTTG  
PGSHFNGLNQTVLNRADALAKDPKMLRSQSQLDLCKDSPYELKKGMSDI

>IRX6\_Homsap

MSFPHFGHPYRGASQFLASASSSTTCCESTQRSVSDVASGSTPAPALCCAPYDSRLLGSARP  
ELGAALGIYGAPYAAAAAAQSYPGYLPYSPEPPSLY GALNPQYEFKEAAGSFTSSLAQPGAY  
YPYERTLGQYQYERYGAVELS ~~GAGR~~RKNATRETTSTLKAWLNEHRKNPYPTKGEKIMLAIIT  
KMTLTQVSTWTFANARRRLKKENKMTWAPKNKGGEERKAEGGEEDSLGCLTADTKEVTASQEA  
RGLRLSDLEDLEEEEEEEEEAEDEEVVATAGDRLTEFRKGAQSLPGCAAAREGLERRECG  
LAAPRFSFNDPSGSEEADFLSAETGSPRLTMHYPCLEKPRIWSLAHTATA SAVEGAPPARPR  
PRSPECRMI PGQPASARRLSVPRDSACDESSCIPKAFGNPKFALQGLPLNCAPCPRRSEPV  
VQCQYPSGAEAG

>IRX3\_Homsap

MSFPQLGYQYIRPLYPSERPGAAGSGGSAGARGGLGAGASELNASGSLSNVLS SVYGAPYA

AAAAAAAAAQGYGAFLPYAAELPIFPQLGAQYELKDSPGVQHPAAAAAFPHHPAFYPYGQYQ  
FGDPSRPKNATRESTSTLKAWLNEHRKNPYPTKGEKIMLAIITKMTLTQVSTWTFANARRRLK  
KENKMTWAPRSRTDEEGNAYGSEREEEEDDEEDGKRELELEEEELGGEEDTGGEGLADD  
DEDEEIDLENLDGAATEPELSLAGAARRDGLGLGPISDSKNSDSEDSSEGLEDRPLPVLSSL  
APAPPPVAVASPSLPSPPVSLDPCAPAPAPASALQPKIWSLAETATSPDNPRRSPPGAGGS  
PPGAAVAPSAQLSPAAAAAAHRLVSAPLGKFFAWTNRPFPGPPPGPRLHPLSLLGSAPPH  
LLGLPGAAGHPAAAAAFARPAEPEGGTDRCSALEVEKLLKTAFAQVPRRPQNHLDAALVLS  
ALSSS

>IRX4\_Homsap

MSYPQFGYPYSSAPQFLMATNSLSTCCESGGRTLADSGPAASAQAPVYCPVYESRLLATARH  
ELNSAAALGVYGGPYGGSQGYGNVVTYGSEASAFYSLNSFDSKDGSGSAHGGLAPAAAAAYP  
YEPALGQYPYDRYGTMDSGTRRKNATRETTSTLKAWLQEHKKNPYPTKGEKIMLAIITKMTL  
TQVSTWTFANARRRLKKNKMTWPPRNKCADEKRPYAEGEEEEEGGEEEAAREEPLKSSKNAEPV  
GKEEKELELSDDLDDFDPLEAEPACELKPPFHSLDGGGLERVPAAPDGPVKEASGALRMSLAA  
GGGAALDEDLERARSLRSAAAGPEPLPGAEGGPQVCEAKLGFVPAGASAGLEAKPRIWSLA  
HTATAAAAAATSLSQTEFPSCMLKRQGPAAAPAVSSAPATSPSVALPHSGALDRHQDSPVTS  
LRNWVDGVFHDPILRHSTLNQAWATAKALLDPGPLGRSLGAGANVLTAPLARAFFPAVPQD  
APAAGAARELLALPKAGGKPFCA

>IRX2\_Homsap

MSYPQGYLYQAPGSLALYSCPAYGASALAAPRSEELARSASGSASFSPYPGSAFTAQAATGF  
GSPLQYSADAAAAAGFPSYMGAPYDAHTTGMTGAISYHPYGSAAYPYQLNDPAYRKNATRD  
ATATLKAWLNEHRKNPYPTKGEKIMLAIITKMTLTQVSTWTFANARRRLKKNKMTWAPRNKS  
EDEDEDEGDATRISKDES PDKAQEGTETS ADEDEGISLHVDSLTDHSCSAESDGEKLP CRAGDP  
LCESGSECKDKYDDLEDDDDDEEGERGLAPPKPVTS SPLTGLEAPLLSPPPEAAPRGGRKT  
PQGSRTSPGAPPPASKPKLWSLAEIATSDLKQPSLPGCGPPGLPAAAAPASTGAPPGGSPY  
PASPLLGRPLYTSPFYGNVTNYGNLNAALQGGQLLRYSAAAAPGEALHTAPKAASDAGKA  
GAHPLESHYRSPGGGYEPKKDASEGCTTVVGGGVQPYL

>IRX1\_Homsap

MSFPQLGYPQYLSAAGPGAYGGERPGVLAAAAAAAASSGRPGAELGGGAGAAVTSVLG  
MYAAAGPYAGAPNYS AFLPYAADLSLFSQMG SQYELKDNPGVHPATFAAHTAPAYYPYGQFQ  
YGD PGRPKNATRESTSTLKAWLNEHRKNPYPTKGEKIMLAIITKMTLTQVSTWTFANARRRLK  
KENKVTWGARSKDQEDGALFGSDTEGDPEKAEDDEEIDLESIDIDKIDHDGDQSNEDDEDK  
AEAPHAPAAPSALARDQGSPLAADVLKQD SPLGLAKEAPEPGSTRLLSPGAAAGGLQGAP  
HGKPKIWSLAETATSPDGAPKASPPPAGHPGAGHPSAGAPLQHPAFLPSHGLYTCHIGKFS  
NWTNSAFLAQGSLNMR SFLGVGAPHAAPHGPHLPAPPPPQPPVAIAPGALNGDKASVRSSP  
TLPERDLVPRPDS PAQQLKSPFQPV RDNSLAPQEGTPRILAALPSA

### ***Gallus gallus***

>IRX1\_Galgal

MSFPQLGYPQYLSASQAVYGSERPGVLAAAAAAAASGRPAGAE LSGSAAVTSVLGM  
YAGPYSAPNYS AFLPYTADLGLFSQMG SQYELKDNPGVHPATFAAHTAPGYYPYGQFQYGD  
PGRPKNATRESTSTLKAWLNEHRKNPYPTKGEKIMLAIITKMTLTQVSTWTFANARRRLKKNK  
VTWGSRSKDQEDANLFGSDNEGDPEKTEDDEEIDLESIDIDKIDENDGEQSNEEEEEKPELL  
RQSSEERLEKDKELSLSGSEGLKPKDALAMVKEASDNSTRIISP GGQSNLQMP SHSKPKIW  
SLAETATSPDGALKSSPPPPPAQVTH TLPQIQHPAFLPSHGLYTCQIGKFHNWTNGAFLTQ  
SLLNVR SFLGVNHHHATHHNNHLQAQQQPSVLTATLGALSSEKPSERTSPKHIENVPR TDS  
PPQPLKSPFQPV RDNSLPQOEGTPRILTALPSA

>IRX2\_Galgal

MSYPQGYLYQPPGSLALYSCPAYGASALAAPRSEELARSSSGSAFSPYPGSAFTAQAATG  
FTSPLQYSTDPATGFPSYMGSPYDAHTTGMTGAISYHPYGS PAYPYQLNDPAYRKNATRDAT  
ATLKAWLQEHKKNPYPTKGEKIMLAIITKMTLTQVSTWTFANARRRLKKNKMTWAPRNKSED

EDDDDG DGARSKEES PDKI PESNETSAE DEGI SLQVDSLTDHSCSAESDGEKLP CRAGDPLC  
ESGSECKDKYEDIEEEEEDEDDDEEDIEEDDGGGGERDPPAKPATSSPLAAVEAPLLGHPHA  
DAARSASKAALGGRASGPPPTPASKPKLWLSLAEIATS DLKSQNLGQGCPPAALASATPASAP  
HSAAYS PSSLGRHIYYTSPFYSNYTNYGNFALQSQGILRYNSAAVASNEGLSQTVLNASS  
VHKQSSDSLKTITNQLEQHYPSSYDSKKDPTEVCTVGVQPYL

>IRX3\_Galgal (incomplète)

MSFPQLGYHYIRPLYPFYCPGSGGSRGGAELAPSGTSLNDADLLHSDSKTALEGSEGFEDLP  
GSHERYLGPAAAAAAEPLRLRHHHLRHRHRRPPCELPSAGPEPPPPAPPPPPPPPHLSP  
PSSASSSSASSPTDAASAGTVPKPKIWSLAETATS PDNPRKSPGSPAAAPQPLPLPPPPPH  
RLVSSCPLGKFPNWTNRAFPAASPHHHAAPHPLALLNTPHLLGLGAAPAAAAAFPRPAEQAP  
SAEPPGADRSIALEVKKKLINTAFQPVQKRPQNQLDAMVLSALSSS

>IRX4\_Galgal

MSYPQFGYPYSSAPQFLMSTNSLTPCCESGGRTLPESGPAAPAQTPVYCPVYESRLLATARH  
ELNSAAALGVYGGPYGGPQGYGNVVTYGTAPAFYSLNTLEAKDGGGSAHAGISPAAYYPY  
EHSLSQYQYDRYGAMDGGTRRKNATRETTSTLKAWLQEHKKNPYPTKGEKIMLAIITKMTLT  
QVSTWTFANARRRLKKNKMTWPPRNKCSDEKRPYEEEEEEEECSQEDAMKSEKAEPTGKE  
EKELELSDLEDLDAAESESECEMRFPFPHPHPLPGGGPPRAAEPPAAAAEEEEEEAAE  
RARGCLKPAAEECEAALLGARPRGCEAKLCFPQGP LLEAKPRIWLSLAHTATSLNQAEYPSC  
MLKRS GGSAAA AVSAPVSVMDRHQDSPVTNLRNWVDGVFHDPLFRHSTLNQALSNTTVSWAT  
TKGAILETGALGRSVNGANVLKQQLANLAHQDSSKEFLAFP KAGSKMFCS

>IRX6\_Galgal

MSFSQFGYPYSTTSQVRLKQIARSSHSERRLENRCFLPPLPFHRS LG RATNTHARFVPS CRA  
PRAPLPAEQSPDPAPRGAPHRPAPRPG LGGTVRAPQARRADIFTALSIVELTI IATSCLEI  
DANGSRGAGRGKPRGSFAILES DRCLRVPAPLRASPLPAPGAPPPPPAPAAPGLPRGRSAR  
PVSPQFLVPGSPGASCCEPAPRSGPDASSAPAAASLCCAPYESRLLAPGRAELNAALGMYG  
APYAAGQGYGNLYPSAEPAAIYTALNPQXGIKEGAGTLHSGTRRKNATRETTSTLKTWLYE  
HRKNPYPTKGEKIMLAIITKMTLTQVSTWTFANARRRLKKNKMTWSPKNKAGEERKEDGTRH  
DGEYGAGSDGRGKSILNIEYTS LCLPKVPKAAEGTPGGADVGPAAEGQRGRAQAGWERGAL  
RSRGGPERRGSSALCRSDPQLRVLARLARSSCATGGDGC RPEERSTTRLHPDSCGGALRGR  
NARS RPREAKPRSPPGSAPSGGGGSAGPGSFGMVLRQARRSSERDADY PVRPPRTPPQSVTG  
KI PRIDGEQIPGAEHGEGERDPRAPERTVPVPLRPATTARSEERMLPASPGRSQCRRPGPA  
VAAHTPLRPLKGRAALANELFSETIKGSAGRGPMKGR LCAVETARLGPA PPGFLRPRGDPCC  
GTARRGQRHSPGGSSGLQPRRWGPLSRSSCPRAAAVSKSDG LLRGRRGGESCRKVLWGDVK  
EGSSTATGWEGGDS

>IRX5\_Galgal

MSYPQGYLYQPSASLALYSCPAYSTSVISGPRTDELGRSSSGSAFSPYAGSTAFTAPSPGYN  
SHLQYGTDPAAAAAAAF TSYVGS PYEHPPAMAGSLGYHPYAAPLGSYPYGDPA YRKNATRDA  
TATLKAWLNEHRKNPYPSKAPAAASVIHSPQQAALAKPKLWLSLAEIATSADRAREAGGETAA  
PGPAVLGGGGPPRPSPPRPSPSAQCFPNGAVLPRPLYTAPFYPGYTNYGSFGALHGHPA  
GGPAAPGAAFNGLNQTVLSRAEGLGKEPKAARSQPQAE LGKDSPYELKKGMSSI

### ***Xenopus tropicalis***

>IRX2\_Xentro

MSYPQGYLYQPPGSLALYSCPAYGASALAA PRSEELARSSSGSAFSPYPGSAAFTAQAATGF  
SSPLQYSSDPAGFPSYMGSPYDAHTTGMTGALSYPHYGSAAYPYQLNDPAYRKNATRDATA T  
LKAWLQEHKKNPYPTKGEKIMLAIITKMTLTQVSTWTFANARRRLKKNKMTWAPRNKSEDED  
DDEGDGERVKEEQSEKAQDCNETSAE DEGI SLHVDSLTDHSCSADS DGEKLP CRATDHLCES  
GSESKEKYDDDEEEEGDEEDRVLPVKPATSSPLTGVEAPILNHQQDGS PRNSNKTS LDNGM  
SPSSQTPASKPKLWLSLAEIATS DHKHSNLG SVLSSATSSAAHNPSY PSSSLLGRHIYYTSPF  
YSNYTNYGNFALQSQGILRYSSAAVTANEGLNQTVLSTSSMHKHTSDSVRTASNQLDQHYR  
PTNFESKKDPSEVCTVGVQPYP

>IRX1\_Xentro

MSFPQLGYPQYLSAGQAAVYGGERPGLVLAAGSRAAAAGSGRPTGADLGSSSTAASVTSV  
LGMYPYSAFNYSAPFLPYTTDLTLFSQMGSYELKDNPGVHPATFAAHTTPGYYPYQGFQY  
GD**PGRPKNATRESTSTLKAWLNEHRKNPYPTKGEKIMLAIITKMTLTQVSTWFANARRRLK**  
**ENKVT**WGARSKEDDNI FGSDTEGDHEKNEDDEEIDLESIDIDKIDDNDGEQSNEEEDKLEH  
LRQGEKESFKKESEVMIPSSDGLKSKDSLGLKESDTSNTRIVSPGGQNIQV**PPHNKPKI**  
**WSLAETATSP**DGALKSSPPPSQANHTSPPIQHAPFLPSHGLYTCQIGKFHNWTNGAFLTQSS  
LINMRSLLGVNPHHVAHHNHHHLQAHQQAPLLATNLSSLSDDKTPERTSPKHSRENLP RTE  
SPPQLKPSFQAVRENTLSQQEGTSRILTALPSA

>IRX3\_Xentro

MSFPQLGYQYIRPLYPSDRQNVGGTRSGTELS PAGTLSNVLSSVYGTPTYAAAAAQAYGAFL  
PYSaelPIFPQLGSQYEMKDS PGVQHAAFSHPHAAFYPYGQYQFGD**PSRPKNATRESTSTLK**  
**AWLNEHRKNPYPTKGEKIMLAIITKMTLTQVSTWFANARRRLK****KENKMT**WAPRSRTDEEGNA  
YGS DHEEDKHEDDEEIDLENIDTEDIESKEDLDDPDTDIHS DSKTDARS DSEASDGFEDLNA  
PEDRLLSVVGQRQVLNEEPQDKCALSSDAKASQPACEQIKLDRI PSSPLENNI **PAAHKPK**  
**IWSLAETATTP**DNRRSPNTGGSVNTQNLIAQHRLIASPGSRFQGTGRAFSAQQSLLSNSA  
HFLOGLSVSHTALGSGTASFPKAAEPKHSTDSLTDRSSTVDIEKKI PVLNTAFQPVQRRSQN  
QLDAAMILSALSSS

>IRX5\_Xentro

MSYPQGYLYQPSASLALYSCPAYSTTVISGPRTDELGRSPSGSAFSPYAGSTAFTASSAGFN  
SPLQYSGDPAAAFTSYVGS PYDHSAGMAGSLGYHPYAAPLGTYPYG**DPAYRKNATRDATATL**  
**KAWLNEHRKNPYPTKGEKIMLAIITKMTLTQVSTWFANARRRLK****KENKMT**WTPRNRSEDEED  
DENIDLEKNEEDDPRKLEEKGDQDGDAGDQKRSPSAVDFDRLEGEVRQGKELDQTRSDSEQN  
EVEERNDLLSKNSAPPTSPLCPDQSPQAQEDQNLHRHTVHNHHHQSIQQLHHHSHQSHPLD  
LVHRNALVQHGPVTNNATSVIHSPP**ASTSKPKLWSLAEIATSS**DKVKESSDAAVAGTTPAQ  
SMVVSASSPSRSPSAQCHFPSNTVLSRPLYYSNPFYPGYTNYGTFSHLHSHHGPTTSP TVN  
STHHFSGINQTVLNRAEALAKECKLRSQSQADLNKDTPYEMKKGMSI

>IRX4\_Xentro

MSYPQFGYPYSSTPQFLMTTNSLSTCCCESSGRSLSDSAAAASAQTPVYCPVYESRLLATARH  
ELNSAAALGVYGS PYTSTQGYGNVVTY GADASAFYSLNAFESKDG TGS AHAGIPQTAAYYPY  
EHTLSQYQYDRYGTMD**GSTRKNATRETTSTLKAWLQEHHRKNPYPTKGEKIMLAIITKMTLT**  
**QVSTWFANARRRLK****KENKMT**WPPRNKCSDEKRPYDEEEEEEEEDSQKATIKNEKKIVDEEV  
AREDKALDLS DLEDFDAIESESSECELKQPFHHQPQDGHQLRQDCVNDHCKDVIKMPITP  
AANQELDRTKICHKPGVDQCEQEVLRGRQRGGESKACFQQQQ**ILDSKPRIWSLAHTATSLNQ**  
TEYPS CMLKHQGLSSPSSSSSSSAVSTPVCVIDRRQDSPVTS LRNWVDGVFHDPLFRHSTLN  
QALTNTTVSWATTKGTLIDSGSLGRSVGNPTNAIKGQLPNI PHDTNKEFIAFQKSGSKMFCS

>IRX6\_Xentro

MSFPQFGYPYSSNSQFLVSTNPSTTCYDSAPRSLPDVVPVSTQTPSIYCPPYENRLLVSSRT  
DLSLGVYNTTYATASTAYASYIPYNADPTTLYPTLTPQYEMKDSTSSLHPGIAQPAAYYPYE  
HSLGQYQYDRFGAVDIS**CSSRRKNATRENTSTLKTWLYEHRKNPYPTKGEKIMLAIITKMTL**  
**TQVSTWFANARRRLK****KENKMT**WSPKNKAMDEKKDEKQEDYNSGCEQENS DHLV TY**GTTGKP**  
**RIWSLAHTAASS**IAVEIENDKKSLSPKCVFVKKIHS GSGYSICKEMKALQHIKPIQTDND  
EVPPTTRMFRSSS

***Brachydanio rerio***

>IRX1a\_BRARER

MSFPQLGYPQYLSASQAVYGGDRPGVLT PSSRAGSAEIGGSASAAAAMSSVLGMPYAHNY  
SAFLPYTSADLALFSQMGSYDLKDS PGVHPASFAAHTSPAFYPYGQYQGFQYGD**PARPKNATRE**  
**STSTLKAWLNEHRKNPYPTKGEKIMLAIITKMTLTQVSTWFANARRRLK****KENKVT**WGARSKD  
DENIFGSDNEGDAEKNEDEEEIDLESIDIDKIDDNDGDQSNEEDEDKRAELES LQEKRHASK  
EPSDGNNNTTRVLS PGRQGGFQV**PVSNKPKIWSLAETATSP**DSAQKPTSPSPVPSHPAFLPS

HGLYTCQIGKFHNWTNGAFLGQNSLLNVRNFLGVNQHNPAAQQQQQQTGPASLQVLSAGNTD  
KMPEDLSPKHIDRENVLNRNESPTQPLKSSFRPLHDSPRNQQUESTQRVLTALSSA

>IRX1b\_BRARER

MSFPQLGYPQFLNASQEVYGAERTGVMPPSSPREGSSDNSANPATAAAAITPMLGMYANPWTV  
QNYSAFLPYNSAELALLSQMGSQYELKDNPGAHPFGFAVHAAPGFYPYQYQYGD **PARAKSA**  
**TRETTSTLKAWLQEHKKNPYPTKGEKIMLAIITKMTLTQVSTWFANARRRLKKNKVT**WGRS  
AEDRDGRIFDSDNEDDADKNDDEEEDLETDMDKAEPRVDQNKAAANNPHAIENIETPRI  
LSSPALKNTDSPMSSGNREQNVVKSVEVSPGGAVCQR **PGNSKPKIWSLAETATS**PDNTQKL  
SIPSTPAGLRASPSTHPAFLSTNGIYTCQIGKLNWASAAFLSANSMLGVRSLLSQNSNFPN  
HSPVTNPEKKPSSASGSPCLSDNSSDSFSFKHNDQENVQRIESPTLASRSPFPVIHDRSHH  
ETSQRALKTIS

>IRX2a\_BRARER

MSYPQGYLYQPPGSLALYSCPLAAPREDLARSSSGSAFSPYPGSAFTASANGFSSPLPYS  
TDPATGFPSYMGSPYDAHTTGMAGAI SYHPYGS PGYPYQLN **DPAYRKNATRDATATLKAWLQ**  
**EHRKNPYPTKGEKIMLAIITKMTLTQVSTWFANARRRLKKNKMT**WAPRNKSEDEDEDDGDG  
ERKDERTDKNMDNSEASAEDEGISLHVDALTDHSCSVESDGEKVT CRTGDLVCDSGAEIQDK  
CEATDLGEERQRGASPKPVTSSPLTGVEAPLLTHHHRENSTNKTCLDGQ **NQTVKPKLWSLAE**  
**IATSDPKQQNCPPGVLLTSSAPGASPAGAVYPATSI LGRPLYTSPFYSNYTNYGNFSPLO**  
GQGILRYNSAAEGLLHKQTGEPLIKTNPNQTEAHFRASNAESKKDPSEVFTVRSQSYLSS

>IRX3a\_BRARER

MSFPQLGYQYIRPIYSQDRQGIGSARAGTDLSPSGALSNVLSTMYGSPFAAAQSYGAFLPYS  
NDLSIFNQLGAQYELKDS PGVQHPGFAHHHPAFYPYQYQFGD **PSRPKNATRESTSTLKAWL**  
**SEHRKNPYPTKGEKIMLAIITKMTLTQVSTWFANARRRLKKNKMT**WTTPRSRTDEEGNVYNS  
DHEGDDGDKREDEEEDLENIDTENIENKDDLDEQDELHSDLKLDGRSDSEISDGYEDLQGP  
EQRLFAMVKDGKEIHGDRAEHFHSHHHHLLHNSLEQANGE PVKINQAI INSPSENNP  
**PAPKPKTWSLAETATTP**DNPRKSPLMNGTSAASATQTIITPHRLLSCPVGKIQSWTNRGFTA  
HQLALLNSNHYLGLSNQASANGLALYSRQAEDRSQNSESTVTERS SALEAEKKLLKTA FHPV  
QRRPQNQLEAAMVLSALSSS

>IRX3b\_BRARER

MSLPQLGYKYIRPLYSTERRGGAEISVTGSGSLSSALSGVYGAPFASTAQGYSAFLPYSSDL  
SVLNQLSSQYEFKDS PGLQHAGFPAAAFYPYGHQYQFGD **PSRPKNATRESTSTLKAWLSEHR**  
**KNPYPTKGEKIMLAIITKMTLTQVSTWFANARRRLKKNKMT**WVPKTRTDEDGNVYTS DNE  
AEKRDEDEEEDLENIDTEDIEDKQDCDYQDDDKSTPKGSDSEEYDDARAEKRIIEDEEQIKK  
SPAEEQEPSNNI **SPALKPKIWSLAETATTP**DSPKKTWIQRNCDAQTVRNPLHVQNWTKMALS  
AHQMAFTSHYLGLKHQSITNIHVKHAEQORTHSL

>IRX4b\_BRARER

MSFTQFGYSYPAAPQLLMSSNAPSTCFESSGSLLD SGVPTSPQNSLYCPVYESRLVASSRHE  
LIPTAVYGNSSCKNHVYDSCSTYGPDSAACYPLGKLNKDG VQTGHSRVTQSSAYYPYDPI  
GQYSYDRYGYGSVD **VGTRRKNATRETTSTLKAWLQEHKKNPYPTKGEKIMLAIITKMTLTQV**  
**STWFANARRRLKKNKMT**WSPRNKNSDEKECDDQEDLDEAQEEP IKTEQDFDDNHGKDDTD  
QLHSDLDLDFDLVESDGSECEKPSFVHVHSETSDHPETHFKDAFHESVTELTRGVHKFSED  
RLRAPAEDHQMAKFYLQGGQK **TIETKPKIWSLAQTATSLN**QVDYSSCMHKRTACPSSNCDS  
SEMTRKRKQESPVATLRNWVDGVFHDPLFRHNNLNQTF SNSTELWTDAISSQNNYHEHSGTPI  
TSSHA

>IRX4a\_BRARER

MSYPQFGYPYSSAPQFLMTTNSLTSCCESSTRSIPDSSAQTPVYCPVYESRLLATARHELSS  
AAALGVYGS PYTGGQGYGNYVTYGADASAFYSLGTFDAKDG SASAHAGITPAAAYYPYDPTL  
GQYQYDRYGSME **GGTRRKNATRETTSTLKAWLQEHKKNPYPTKGEKIMLAIITKMTLTQVST**  
**WFANARRRLKKNKMT**WPPRNKGSDEKKYDDDEDGSPPEEQIKSETNDESKDREDKDLQLSD  
LEDFDPLESESEPECELKHRFQISAHMETKDPQKLSI PGLLEEAKSCLKSPEDCELELRHKA  
CFQQQQQSHP **ILDSKPRIWSLAQTATSLN**PAEFPSMCLRPCASPS PAGGPDRQQDSPVTTL

RNWVDGVFHDPLFRHSSLNQTNTTVSWTNKGSILETGALGRSVADSGKQEAGKDTMTFPKGV  
NKIFCS

>IRX5a\_BRARER

MAYPQGYLYQPSASLALYSCPAYASVISGPRTEELGRSSSSGSFAFAPYAGSTAFTSASPGYN  
SHLPYSADAAAAATFTSYVSSPYDHTTGMAGSIGYHPYAAPLGSYPYGD**PAYRKNATRDATA**  
**TLKAWLNEHRKNPYPTKGEKIMLAIITKMTLTQVSTWTFANARRRLKKNKMT**WT  
PRNRSEDE  
EEDENIDLEKNDDDEPNKPADKGDSTDTEADHKLINPGEIPCDRFKDETHSKDLDPPLTDSE  
LKEAEERTDLLAEQAKPTTSSPSVLQRGSDLITQEKPSEPGHAASSTGNSNVTSVIHSPP**PSAP**  
**KPKLWLSLAEIATSS**DRCKGSSRLHRPAGLSQSTVIASVASPTRSSPQCPLPNNTVLSRPIYY  
TSPFYPGYTNYSTFGHLHSSHGTNTSSTAHFNGLSQTVLNRAEALVRESKQRSQTQVDLCKD  
SPYELKKGMSNI

>IRX5b\_BRARER

MAFPQGYLYQSSLSLYSCPPYGSTGITAPRTDDLGRSSSSGSFAFSPYASTAFTNTTVAFSSLO  
YSPESAAPFTSYGGSPYDPSPGMTGSIGYHPYAGPLGPYPFG**PAYRKNATRDATA****TTLKAWL**  
**NEHRKNPYPTKGEKIMLAIITKMTLTQVSTWTFANARRRLKKNKMT**WT  
PRTRSEDEDEDEDSI  
DLEKNDEDEDEPMKTAESTKDSETRAEDHDDSTDSVIIDCGEEENRTESPVPTTSSPQDELS  
ESTIKPLSGNCKPTSVIP**SPNPKPKLWLSLAEIATSD**KGREEVSHTSRAGSPQCTFPARHLYY  
ASPFVGFNSYGAFGHLNGCGGNSTHLNGINQAVLHRTRDSKLTLEMCKELTFEHKRANI

>IRX6a\_BRARER

MYGSPYAAAAAAGQNYANYFPYSADPSAIYSSLNPQYEIKEGSGSLHSTITQPATYYPYDH  
SLGQYQYDRYGTVDNF**GSTRRKNATRETTSTLKTWLYEHRKNPYPTKGEKIMLAIITKMTLT**  
**QVSTWTFANARRRLKKNKMT**WSPKNKAGDDRKEDLDSKDSKDEQDLQFSDLDDMEDEDCDKL  
DSDCEKSGQDDLPTSSPKRDCNPDIPLHSNFPSFPCGLKSLGPLNPDYLDHLGSKPQQQQP  
SPQSTSINTVALSHF**FESSEKPRIWLSLARTAAAG**VVLGTQHVGDVRTGPVDCMQQGVRLPTVG  
AVQCGELKGLQDPTNLSNTESLFQEGLOGIHKAYSSGSFKTLQLHSSSYPLTESCOYSSME  
GFPSAGKTETESSELSDTCPTIQEAKTTAFRPMVKR

>IRX7\_BRARER

MPASSTGFANFFMDRNINMPAGYQLLGCPPGMQPPPHLVGMAGMPLPFSGIPGYSFIPYPH  
PGHMAHISNSYDLKAASPYHQALLGRGGPYTTPYRPIPAD**PSRVTKVATRESTSALKAWLS**  
**EHLKNPYPTKGEKIMLAIIVTKMSLTQVSTWTFANARRRLKKNRVS**WASKGKSDEEDEEEEGE  
SEEEGSLRKGTEDEDEIDPQTVDEDEEDVVVSKSVEHRLAGGLEQQKESDKSDTLTKRESY  
KQI**ADVQPKIWSLAETATSD**IVKKPSDLKHLQTSPDFGQWWAGWPSRDSYSPVNLSTHDL  
KQSQ

***Tetraodon nigroviridis***

>CAF96727\_Tetnig = IRX4a

MSYPQFGYSYSSAPQFLMATNSLTTCCESTGRSIIADSGVTGSGQTPVYCPVYESRLLATARH  
ELSSAAALGVYGSPPYGGQGYGNVVTYGTDAFYSGLTFETKDATASAHAGITQATAYYPY  
DPTLGQYQYDRYGSMD**GGTRRKNATRETTSTLKAWLQEHHRKNPYPTKGEKIMLAIITKMTLT**  
**QVSTWTFANARRRLKKNKMT**WPPRNKGSEEKRYDEDEDGSQEEQIKSENNEDETRSRPKDL  
QLSDLDDFDLTLESESECELKHRYHMNAHMSTTNDPCPAGHLIKDSSLKIPIPALEQDLSKSC  
LKTSAEDEFQTVSAQPAKGCYNQQQQQH**MLDGKPRIWLSLAQTATSLN**QTEYPSMCLRCQPPS  
SSLSPPPAATSPTVGLDDRQDSPVTTLRNWVDGVFHDPLFRHGTLSQA

>CAG05430\_Tetnig = irx5a

MAYPQGYLYQPSASLALYSCPAYSTGVISGPRTEELGRSSSSGSFAFAPYAGSTAFTSASPGYN  
SHLPYSADAAAAATFTSYVSSPYDHTTGMAGSIGYHPYATPLGTYPY**GPAYRKNATRDATA**  
**TLKAWLNEHRKNPYPTKGEKIMLAIITKMTLTQVSTWTFANARRRLKKNKMT**WT  
PRNRSEDE  
EEDENIDLEKNDDDEPNKPTDKGDSTDTEADHKLNVNPGDMGCDRFKEDTHGKDTDPLLS  
DSE  
FKEQEERTTELLPDSAKATTSSPPAVPRGNQAVAQQDKPSDLSHAPSTVTSNVTSVIHSPP**PS**  
**APKPKLWLSLAEIATSS**DRCKSSSDASPSCPGLPQSAVMGTNPSPSRSPQCPLPNSTVLSRP  
LYYTSFPYPGYTNYGGSFGHLHSTHGSVTTGSTAHFNGLNQTVLNRAEALVRESQRVRGQ



>CAF99496\_Tetnig  
MSFPQLGYPQFLGASHEVYGGERPASAREGGTEGAVNSPAAAASVGSMLGMYGSPWSPHNYS  
AFLPYSGATDLALISQMSSQYELKDSPGSHPASLPVHAAQGFYPYGYGQYDPSRAKAATRE  
TTSTLKAWLQEHQKNPYPTKGEKIMLAIITRMTLTQVSTWFANARRRLKKNKVTWGRSAED  
RDGRIFSSDNEDEHGKNGSDDEDEEEIDLETVDVEKPEDQRTGEQSTGKEKRETEPGAKEQA  
SEQKGLDSSRTLAEGLRGEIASVLSRSPVVKLDNSTGRQECQRPOQSKPKIWSLAETATA  
PDSSYKLPASHAHPAFASAGHPALIPGHGIYTCQIGKLNWANAAFLNANSLLNMRSLLG  
EDSENRRNDLKSPPFKMITDRCFTRLSISDVIGVDTENQQPGSHRSNLRKLLPPPASRDCQ

>CAG03859\_Tetnig  
MPAGYQIPVLGCPPGLQPQQQLAAMAAGLPVITYSGLQGYNFVYPYAHHRPVTHMNGFDVKGV  
PYHHALLARGAAFFPPYRHGAVEDPGRVAKVATRESTGALKAWLNEHLKNPYPTKGEKIMLA  
IITKMSLTQVSTWFANARRRLKKNRVSWASKGKSDEEDEDEEQUEGESDEEEEGALGALDKR  
NQDEPEREDGSEGESAQESSAPVESRHRQPELGEETKKSDDSDGPAVGTKENSANQKPKIWS  
LAETATSEPVRRAPDSSPG

>CAG14759\_Tetnig  
MSFPQLGYQYIRPIYPPERQGIAGNARSGTELSPSGALSNVLSSMYGSPFAAAAQGYGAFLP  
YSNDISIFNQLGAQYELKDSPGVQHPGFHHPAFYYPYGYQFQGDPSRPKNATRESTSTLKA  
WLSEHRKNPYPTKGEKIMLAIITKMTLTQVSTWFANARRRLKKNKMTWTPRNRTDEEGNVY  
SSDHEGEEGDKREDEEEIDLENIDTENIESKDDLDLDDQDDLHSDIKLDGRSDSEVSDGYEDLQ  
GPEQRFLKAVGKEGKEVERGGEHFHSHQHSHHSLDTKAPQPNGEQLKLNVAVSAGSPPSENN  
PVPAQKPKIWSLAETATAPDNRKSPQMNGSSPAGPAAQTIIGPHRLISSCPVGKIQNWTNR  
AFS

>GSCT00025552001\_Tetnig = irx5b  
MWWDSPRAAAAAAAAAAAAAAAAAALGSFAGAGYDPSSGISGSVDYHPFGPLGPYPFGDPTYRKNAT  
RDATATLKAWLSEHRKNPYPTKGEKIMLAIITKMTLTQVSTWFANARRRLKKNKMTWTPT  
RSEDEEDDLDLERSQDEEEPLKMDEGPERRSRS

>GSTENP00013878001\_Tetnig = irx2  
MHRDGRWRGRALGQPMAASSALLSPFQLRAVSPDSNRAMSYPQGYLYQPPGSLALYSCPAYG  
ASALAAPRSEDLARSSSSGSAFSPYPGSAAFSASAGAGFSSPLSYTADPTAGFPYMSPPYDA  
HATGMAGALSYHPYGSPPGYQLNDPAYRKNATRDATATLKAWLQEHKKNPYPTKGEKIMLA  
IITKMTLTQVSTWFANARRRLKKNKMTNYTNYGNFSPPLQGGILRYTNSSGVNLAAAAAAA  
AANESLGSVQQALEVSTNTKSRPGSPLVKNNPNQIVTVEQQQHFPAHLEGKKG

>GIDT00019750001\_Tetnig = IRX6a  
MEGEEEEELKEGGRKRMGRSELNAAALGMYSSPYAAAAAASQNYANYFPYSTDPSIYSTLTATY  
YPYDHS LGQYQYDRYGTVDFNSTARRKNATRETTSTLKTWLYEHRKNPYPTKGEKIMLAIIT  
KMTLTQVSTWFANARRRLKKNKMTWSPKNKAGEDRKDDLKSEQDCANKDSVDCKEEKDLRL  
SDLDDMEDDDCDKLDNDCEKVAVGDEELQRAMAASGGSQKKDCSPDLQLNLTNNFHSFPCAI  
KSVTTLPPLPSDFLDPVASKAP

>GSTENP00017591001\_Tetnig = irx4b  
MAYSPLGYSYSTTPQFLMTSNLAGCLEPGTPPSHSALRSTSQLAPAIQVYSSPYPKSQGY  
NTSEATALYSRGTLDLDRAPSGPVTPQPSAYYPYEPFGQYPYERYSYSCADGASRRKNAT  
RETTSTLKAWLQEHQKNPYPTKGEKIMLAIITRMTLTQVSTWFANARRRLKKNKVTWSPRA  
GKSDDRGCEEDSDDAEKETSNDKIDPDQCTDLQSDLEDFDLLES DGS DCEPRPQFFSEEG  
GASKVTPLSHGHTVETLTKKDGLSPECPKLPVHQQNSSFYPSPLQNAEPKPKIWSIAQTA  
VSLEAEYPPCMLSSTGSSSPAYASNMSLTGKDGQQESPVSTLREWMDGVFHGPPLQHH

***Petromyzon marinus***

>Irx-a\_Petmar  
SLRSKGSHEYIKDSPGLQHSSFPYPTAAAYSPYGGFYQTDPSRPKNATRESTATLKAWLNEH  
RKNPYPTKGEKIMLAIITKMTLTQVSTWFANARRRLKKNKVTWAPRSRSDDEEGHSCGSDAE  
VDRKEEDEEEDEEEDAVGEEEAEEEDDDDEEIDLENIDIEKCEEEEDSGDLSRDERDGAM

EAELKMREAVKQGTAPGMRTSPASCLSSEA**PTGSKPKIW**SLAETATSPDS

>Irx-b\_Petmar

GAQYEQLKECPAMSHPVFAPHPALHHLPPHYSPYGPQGPTGGPHGAAVVGS**DSGGRLGSKA**  
**ATRESTSTLKAWLSEHRKNPYPTKGEKIMLALVTKMTLTQVSTW**FANARRRL**KKES**RRGGGG  
GGGGGAGGSVAGEVGCWGGPPGGGLGGGGGGGGGGGGGDSFHNRGDARTDSEEEVDLQSV  
ARRRRPLATSPSGSAEVDVVDEDDAAADGDCARDVDGLVE

>Irx-c\_Petmar

MHCWLRTSSPYDAHPLTYHPYGGASHPTLGPVGYPYGAGGCGV**ADPAFRKNATR**DATA**TATLKA**  
**WLNEHRKNPYPTKGEKIMLAIITRMTLTQVSTW**FANARRRL**KKEN**KMTWVTKARSDDELEDD  
DNDGSGGKELGDSSERSDRDGLILNVSEPASESQDDRHHVIAVPGDGGGGGGGASKCDAAS  
AHRAGPGCDMSDGDDELFPTSATGGIGGATVVLVTPPPGSQQQPASAPDRPSLVQHTSAAM  
**NASPSILTTSPVAGTEAPRL**GRGSPHHNHHHHHHQOQAAMQAAGIPCMLSAAAAAAAAAAAA  
AASPSSSTSTQAHTYYTCASPAYFSRYGVAGYAANFGALPGAGGGVVGGGGGGAGSGGGGG  
LRGLPAPPNGLVYQTVFKSGHRVPPPAYLFAGYGGGGVGTGGGGAEVRILETQETHDGKEM  
IALDCKREQAVSLNIAVPHTHDARHAVHYSMQYIPVLRRECNTVINYSRGLW

>Irx-d\_Petmar

MAMYKYGAA**EANVTRRKNATR**DATA**TATLKA**WLNEHRKNPYPTKGEKIMLAIITRMTLTQ**ISTW**  
**FANARRRLKKN**KMTWVPLGSHSRDEKQPECDSSHADQHEDNGDDSRMLDEGDEGRDDHRR  
IFSPATMSKRSVSPTGRHSSNSSSSSSDSESNLALTVQQHAPPIPNSCRHHHSDGDDDKQH  
LAGHSNGGHCGVTGVGGLIDGATWEGRAEQK**PPADKPKIW**SLAHTATA**QMGEQSRWSPRPG**  
SVSALPYFVPPPPPPQLAVESGGNPSTGVSPVEGLRCWASEAYQGGFSAAGDLLWGGDGGE  
RGSSFWTDGGGLRFKLAERGTGAGRS

***Ciona savignyi***

>irx-a\_Ciosav

MKCKRIRNKRQDVSGHFASTFKFAIDYNLRKRKGLACNFASYPKFNDQPKAVSIVLKGALLR  
QNRSSANQSEAGVEHQPDYRLWTTDDNTRKFFLIALWGLELLIENHSFLAWSEWSRIDEYS  
NINTSIEANVKVLITGVIDRRWGVRLYDTLSNKCPINAVGRAALSGSSETKAKKRIRRTVVT  
ISRTERMLIGIKCRVSPYTDLLFKRVELQSKLCKSDLLLNGGTVVGTSPFIMHRIPHDNKS  
PAFPVPPIKRLLPSNFTVNFAPAEAKLRCSRSDGQHDIVLGKSTQHLYLPRVDFNLKTPMKMDSRK  
AVGIEQCSLHGELKRILLVQVAVQTSHVLLRFVLWRKELDYKASENGLFRRKRDRPHPLGL  
GPNENSKPGYFGDSTVSPPLVSVSSTTHHAGDPTSQIYSAGEGCFIPGRMQSELPLNMY  
AAPTGSSALSSPANYGGVPAAVGSAPGLVPPHYGSNGMDHSPYSSLAPTYDMKPGGGDMWG  
GSYGQAPPAYYAYESNFGGQYPYDRYCGVMDN**DGVRKKNATRESTNTLKAWLQEHKKNPYPT**  
**KGEKIMLAIITKMTLTQVSTW**FANARRRL**KKEN**KMTWVPKNRSNENSGSTGEKNIDGEDDV  
LSQNQDSDGKVDADHSLDSDDSTEREVTGTTEHDIINTPYSRDSGVFGGEKSDDLNVSDQPE  
DNLAQKDFNTSYQPANDASFERPSLAAAEQVQNR**YAANDAARIWSPINENGNAS**SYSNKCAE  
NPADSQNLNLPSSFRASYNSDSFSSMSRQQQTSSVVSPALMSCAELPGRVVECRYPSVQNWVD  
GVYNTTIPATPETETAACHATSVERRNSMDGRIDERLHGVSSPLPDYHHQQFQCKQLSTHNS  
HLSTHDNDQYNYHTRRAPMDNGRSPVNNIPGQVAPPSYQMFNFNNQIQPFNTSDYHDERLS  
QSTGDARIGYYPQRTTEPRQNMVQANRLQSSNMYHPGETKASMLSSPSSASGSSPASRQL  
CQGESSVATRHISSYHDGSGMVVSASNPFAFHGNYHMSGDQSDRVHTHIANSSANNYML  
GTSALDQRNMEASQGYQNVLNNQGPYSRDLVAIIYRLTITPTYRINVTYHERVNTLSYETR  
IKSKYIACNNTPAMCT

>irx-b\_Ciosav

MLVAQPLDVGLNKTGAHARRISTYSTGEEFFVPGQTQADYSGVTMFPSQTVPPSRGAVSNYC  
SGPSGIRPGMPPEYGS PGVNHTPYSSNAATFESTIDTVDTWPSRNFNHQRYTPYNYGSHY  
SYDGYSQEMND**PSGNRKSATRESTNTLKAWLQEHKKNPYPTKGEKIMLAIITKMTLTQVSTW**  
**FANARRRLKKEN**KMTWVPKNRSNETTSSDKKVTDTNDETASDTDDFDINPDTNDFHKMANQ  
LSDLTNTKSISTEPHNLSAQPSGTSLVSSPRQSSSIYQSLAGTATHTQSLYCS**KS**IKSES**NSW**  
**SPINENGNAS**SYSNKCVENPADSQLNLPSSFRASYNSDNFSSMSRQQQTSSVVSPALMSCAE

LPGRVVECRYPSVQNWVDGVYNTTIPATPETETAACHATSVERRNSMDGRIDERLHGVSSPL  
PDYHHQQFQCKQYTNEPMQSYNGYQSSDNFTNNIQTYHRPMHNQATPYPLPDQSINSVHYVN  
QQRVPLQHASAHINSDFSYNATSLQVTPSSASGSSPASRQLCQGESSVATRHI PSSYHDGSG  
MVVSASNSSAFHGNYYNMSGDHGTGSNLINTCSPKYNLPMDFPVQQDNLYSTVLCVHTSFTR  
IFDVKSAPLIALLNSRCANAKLASCD

>Irx-c\_Ciosav

MYIKTCIDSPGPPVQNVASSINSGRNSNQSSLCDIASRCNCRINNGRFITKKQGQSTVLY  
NFKIRTCDELVTKIVSITNRLLEFVDRWPNLRSRTRKGTNRREDSASTQSHLSYISDDKSSG  
TRSSDHDGNAKIVDAARSTLAEQRSFGNGIHFPADDRGIPGRPADLTSALFGLPYVPVAPAG  
LNPPIYSSLLPPGIDAATLHSTLSRIDPKELSAWGNPMAPTHLYPYDQALMYQHSYGLSLAD  
GARRKNATRETTSTLKAWLNEHRKNPYPTKGEKIMLAIISKMTLTQVSTWFANARRRLKKEN  
RMTWSPRNRCGEDNERESEDEEQERVGEGNKSYSYHIASCYAGVFSRVCGSKYVCARLSREL  
NTANYNRAPREYSCPCYKRVTSLASWRSASVFNVSSTCSSTNSRLYKEGIEKCDLIDKSPID  
AMGTLNLRFRFRRCRCAWFETGVAVSELYGAINREKRDVVGREISDAHPVNEDGNPDEM  
RHQDRRDNEPNVARSNPTVGPSTLAYQRHHRHQQQMFLRHLASLPPHLRSVDPFRQFQLQN  
QRLAVQGLPRMHPRGFEQPDQQRSSLSPPSASASSYDRSPSPVNQQRNFRPPPPLNQIGLP  
SKSPTRFRFRFSPDRVPRDEADDSAKKTEKKPKIWSVSLTESNSTSQDAPPSPRQREEAPNG  
KSPNPMVAQAWMEEYQRQLATRNQLLASTLASIAAKRGVSGGFPLPYPTALATSRDSP  
TKTSRDDDESLSDTTEGANMPINLSKNGERRNHSDDATMVIDDVEMKPIMQSIVAS

>Irx-d\_Ciosav

MSLHGRWIDAFGAIGGGEIRLNIISLGGTREKHTTTQSGVFMCAQPCSAKYKHSRMVALFPLI  
IDGVYTNVICIVFIFAVRIGKYISERWRYRALRVEFAVDYFNSASQIWNIFTREMAGKSSGS  
DNKTVATITFGESREKRSRDAVSKRERRIGSLTTPKTGATINSSGEIREMDARLVAARI PG  
FFMYQPPYGAPAFPGYLPYNPAAAAVAATDPSAFYPTMGPGENADVWRAGLSQAAAAAYY  
DPSMAAHYGGYGYGPMGLSDGARRKNATRETTSTLKAWLNEHRKNPYPTKGEKIMLAIITKM  
TLTQVSTWFANARRRLKKENKMTWSPRNRCGEDDDDDDDVTDDVGNHGNTSRSSSPVGGADDR  
DFGRLVEMGGDLSDGGFSDAREDRRAKEEKRKSPPSLEVESATVISSNTVSIPTLTRDLHQ  
QSELYPHLCKRVPESSRSLTFKFQAAKRRPTSTAGQFNHAAAASLIAASRGHPLPPHVMMA  
LNEQAQRHYQHALLQMPNYPFHGERALSTSSNASPSPSASSTSPPTSSKPAETSTSTSTPPKP  
KIWSIADVATSRDSPKHTPHHPKAPSLSPPTPHCENKDI PNQVQWVGMLQHKLAMHPGNP  
RLMGLSPFAPRCKSSPKRDKAATFVPPVLRHHRCSARKIRQRFAQVAELRQNYVYRKITSV  
TRRTNGNARKSRFRFGVNRVCVNARLHQNLAKYLERIRGELELDTNRTAGWREKLKSGGAGL  
KHIRCEAATSAMRSWPEVRAAGWPGSNCRMRIRLHPMTNQPHPINSFEVSDLHRFIRCRRR  
IAEAKAAQLIQDHVSTFIRVVVFYFKRRPLVSNLQDALLCFSMRERYRKVMGRRKCYDQVDTQ  
PNNDLVDGTKLYRCL

### ***Ciona intestinalis***

>Irx\_c\_Cioint

MQSELPGLNMYAGPGGSSALTSPPANYGGVPAAVGSAPGLVPPHYGSTGMDHSPYSSLAPAY  
DMKPGGTDVWGGSYGQAPPGYYPYENTFGSQYPYDRYCGVDMNDGVRKKNATRESTNTLKA  
LQEHKKNPYPTKGEKIMLAIITKMTLTQVSTWFANARRRLKKENKMTWVPKNRSNENASST  
EKKIDPDDDDNSQNQDCDDKIDADQSLSDSSAEREVTSTNDNDVNTNTPYSRDSGVYGGEK  
SEDLNVSDQNDQQLGQKDFSSYQQPSDVGFERPAMPTDTVQRYGPTDASRIWSPINDIGS  
GSSYPTKCPDNVGDShLNLPPSFRGSYSDDQFSAISRPPQTSAVSPSMISGVDLPGRIGEC  
RYPVQNWVDGVYHSAVPPTDPDSTTCHPISAERRDSIDGRIEVDRLQGVSPSSPHFQHQQ  
FPCKQLPTQNPHTLVNDNEHYTYHERRVPTDNVGSFGNLHGQVAPPSYQMFQFNSQLQGLGT  
GDYYHDERMAAQSSAEARLGYNPNQRSADPRQDMNSQQQQGRIHNVYHPGDPKPSVLASPS  
ASGSSPASRQLCPGEQSLASRLVPSSYHANPGMSVSATNPSTFHGQYYQMSGDLTKRGHSHT  
SNTPSNNYMMVCGNGVDQRNMDATQGFQNPNTQHNNSYNRSPLPSNSPHTELIMSPRDGDEL  
REMQAETLTNLSTR

>Irx-a\_Cioint

MSFLPFPVAFSSNPSMTRSRTSLSEAQATISDPGRSGLTEQRSPDNGVHFPAEARGIPGRPTD  
IASALFGLPYTAQVAHGRLVPPVYPALPPGIDSAALQSTLSRMDPKDFPSWGNPLHPGPFYP  
YDPTLMYQHSGYGPMGLSDGARRKNATRETTSTLKAWLNEHRKNPYPTKGEKIMLAIISKMT  
LTQVSTWTFANARRRLKKNRMTWSPRNRCEENERESDEEEREMREEGNPNEMRRTTEPR  
DSDNSNPGTNLSGNSDLAYQRHQRAHQQMFLRHLASLPPLRPVDPFRHFQNLHNQRLATQ  
GMHLLPGNSRSNDHVGALKHDQQRSSLSPPSASASSYDRSPSPVNQPRNFRPPPPLNQITS  
PSKSPSHRFRFSPEPTERGSDEENKKTEARDSKKEKIWSVSLTETTDKPRSITSRDSPPTP  
RHTIESPVGKSPSNPLAVAQAWMEEYQRHLATRNPQLLASTLASIAAKRGSSGGFPFLPFQS  
GPQSAVSVTSRMESMETSRRDDSLTSDTEAGPNLPMNLSKNKDRGNHSNDVPLVIDDVERK  
PLMRSIVAS

>Irx-b\_Cioint

MDARLVAAARLPGFPMYQPPYATPTFFGYLHYNPAAAAVAVAATDPAAFYPPIGPENADAWR  
AGLSQAAAAAYDPSMAAHYGGCYGYGPMGLSDGARRKNATRETTSTLKAWLNEHRKNPYPT  
KGEKIMLAIITKMTLTQVSTWTFANARRRLKKNKMTWSPRNRCEDEDDDLADDAGNHGNT  
SRSSSPVGGAEVDMMRRGDFGRFEASGGDLSDGAFSDGRDERRAGKEEDRRKSPSSLVSRSL  
SNDESRSRLANGHFVKHGIHPYSNPRSSPASRPNISPPIQARPGLPFPNMPMPQAPSSQAP  
PHFHGSQFNPAASLIAASRGHPLPPHVMAALNEQAQRHYQQALQHMPNYPFHGERALSTS  
TNASPSSTSSRVSSTSPSTSLKPASSAETSTASTPKPKIWSIADVATSRDSSKDISNRSK  
ICKSHSLSPSSQSDDKMSNVRSWVGMLHKKLAAAMHPTNPQLMGLSPSSQGSKVPSNG  
ARYPQSFPRFADIVAAQOEKANAAMREMKGPHHSDDVIIMSERSPTIHETPMEALQARRNSS  
HSPVSPQQSDEH

***Oikopleura dioica***

>Irx-a\_Oikdio

GAAGSSDVWTGAGVAAPGAYGSAAAAGYSASHYPGAEAYGSFAFGAQYPYAYNDMSDGVRRK  
NATRESTNTLKAWLNEHKKNPYPTKGEKIMLAIITKMTLTQVSTWTFANARRRLKKNKMTWV  
PKNRATDGEDDESNGLGEENEKEFSIKRRLFDCEFSQKGGSEDETSLGAPIVRLDDNPAVS  
AVQHLHISDLLETQSPSR

>Irx-b\_Oikdio

MISTLLNVNYGHCLRPVFTNSGGTQLRRPRGFRRLTQIMSVGSRYSEERRKCPIDLKMGMGV  
PQVNPMAAQYGYAQLMQAQSTRKNATRESTQQLKAWLKDHQKNPYPTKGEKIMLALVSGMS  
LTQVSTWTFANARRRLKKNKWCPEGGEDNDGSDSGSVTAEDSASSIEQRPVIVSVTDESGY  
SSSDRDTGSPPACTVPVAPPALFSSSLLPSFAAAVPLPRYMPRSLETSPVAPQKRKAGSLWS  
IADITGSS

>Irx-d\_Oikdio

RKQCTLQPTALCRSSDDASVRLQIFRYGSAGRFPSSNGHRKNATRENTAPLKKWLEEHMRNPY  
PTKAEKITLAIISSMSLTQVSTWTFANARRRLKKNRVTWETPRETTGSDEHETEELARETDS  
RNENATCPSQVSSPPRRRSPVMSTTMAASAHSTMPSLAGLRPGLLGVAIHNSVPSASIIYQQ  
LLMNHILRPVTSMPPLTVCAPTISNSNSSNAKYPETSSQPKRIWSVAEEIERARTESPGSEG  
DSDRR

>Irx-c\_Oikdio

MICYSNGQTNIIILSAESGDELAAGNGYRSPSTSIHNIDSESGATVVEFNLRISFKIKPSNL  
EIMNPHSLGLTSSLLSGLDQRLLOQQQQLLQNPFRGLGTHGLDPALIARAQLTSQLPRLPQLP  
QVIDPMLAAQYGYSQLLHGAGARKNATRESTAPLKNWLKEHQKNPYPTKGEKVYLALISGMT  
LTQVSTWTFANARRRLKKNKWSPPSGFEDDDSSSTPNKPSSVTDEESNAVKRVSEDHIESGY  
SSHHSLSQSSSEASPERADSPSVSEPAPIRVSASIAHIPVSPSSSLPRPKIWSLAEMTTSSD  
EEEELNVN

>Irx-e\_Oikdio

MNFGEQINRLHLQSRVPTALS DVRVPAIILPGSPLYPSSGFLPTGYPFGLLAFHPQSTIQRRQ  
TARESTGPLKAWLQEHPRNPYPTKAEKVMLALISGMSLTQVSTWTFANARRRLKKNESGNKEDT  
SDDSIDGKDDTADESVISVVDIEPTVHVTPSLARERESEQEEATESKEDEPVQEDRSSSSTP

PPTSEISNSTFKPKIWRIVDQIQNDSNV

***Branchiostoma floridae***

>Irx-a\_Braflo

MSSMSYAQFGYTYPSSSPLLMSHAASCCEAGRPIMSDPHTGQAVCSCQYEGRVAGLVPPRV  
GEMSLSSVYGSPYAGQGYIAAFGGDPSAFYSPLGNPFAMKEGAEAWRANLQQPTAYYPYDP  
TLAGGAPYPYGSYAAMDGARRKNATRETTATLKAWLMEHRKNPYPTKGEKIMLAIITKMTLT  
QVSTWFANARRLKKENKMTWSPRNRSGDSEGGEGSDIEGDEDTEREGRDGRHGSDDKDVED  
VDLDDIDVDDDKVFEEDSTTPGEESKDNEYERKTGSSSDISPPTHTIPSESTEDNTREIQR  
QRETQASSPSTNSPPVAPKPKIWSLADTATSSSGPTARPDAPQNSRDHRTITQLVLPQTV  
RQAVRLCSQLSAVVDPVRIQVAQOSSEPDLRFAFRPVQKRVDEADLPGEEPGLSRRSTRFG  
PVPTRPWPWEWARRAPRQRDPGVMARDPCAYFTAAGWIIIGSKLTGDGGCGWSPEPVHHTAG  
RSIWMVMTTEADDLHSRSIFLWDSPSAVAIPTEDADGLRNGFIILLDAGVAIVTKDADERH  
RRSIIKDALSAVAIVMEDADGLHSRSILLRDAPSGVVMDDRRPTDASQFAHQDKESTGSLQE  
KARVLDVLSLVSKFLFLIH

>Irx-b\_Braflo

MSYPHFYSLPSSSPLLMSHAASCCEAGRPIMSDPHTGQAVCSCQYEGRVAGLVPPRVGEM  
SLSSVYGSPYAGQGYIASFGADPSAFYSPLANPYDPSAGLQQPTAYYPYDPATLAAGAQYHP  
YGGYGPMDGTPRKNATRDTATSTLKAWLNEHKKNPYPTKGEKIMLAIITKMTLTQVSTWFANA  
RRRLKKENKMTWSPRNRSGDERREDGSDSENENDDDEDGREGGEDKNQEDDRGLEGRDNQEL  
DVGNPCEENRQEDNASGSVSDYRPPQSSSPADSLGSI SAAPRPASPEPSAANSVPVPII  
SENKPKIWSLADTATSSSPGLRSEPPRSLPTGAIPTIPGQFPGHRPFDVANLRHWVNGFSQ  
PIRTHAMSSSQGAATSVFSSGQLPTGVSLAGLPVRTL SATAPTGVHAFVLRHAFPGVART  
HSPATNEVSNPTNARYREGPYSEGHPTAFKPVQKSHNQGVKCVQTTGKRRLPGRAGRNNPSQ  
CGVHLRSTVTFTPGRPRSPPFSSRLTDRPVVSVHNILSSTCLDLPPP GGAC

>Irx-c\_Braflo

MIVTVIRTL SFLHKKHAFIYRSHVILRLTLPHGRTRHNKNLYSQAKKTTPLCPRATPGRRSQ  
NPDNPTVIFSPSTRHPTFVAQTFIIFIIDAVAKEPAPGVGQLLARRADKATSLRRQICEASL  
LMPARASHAPRETNSPQMAVGRPPLARHQKGLLINEEPHI IATLELSKAGELLDRIQETNGL  
ARTLSGMSYAQFGYPYSSSPLLMSHAASCCEAGRPIMSDPHTGQAVCSCQYEGRVAGLV  
PRVGEMSLSSVYGSPYAGQGYIASFGADPSAFYSPLANPYDPSAGLQQPTAYYPYDPATLAA  
GAQYPYGSYGAMDGTRRKNATRDTATSTLKAWLNEHRKNPYPTKGEKIMLAIITKMTLTQVST  
WFANARRLKKENKMTWSPRNRSGDERREDGSDNEDDDDDEDKDRKREGNSDDDNHGGLEGDR  
DNQELDVGNPCEENRQEDNASGSVSDYRPPQSSSPADSLGSI SAAPRPASPEPSAANSVP  
VPPII SENKPKIWSLADTATCSSPAPRPDI IKTTLQGPVHMQFSHHRPFD SAVTNLRQWVDG  
VFHRPIGSLPAGPMGPLPVASQASASATVSGMHPSSNPHTT PPGFVSSQERTPALPIALRTH  
ASPAKDAPVVESAFQGGFMIMIEWLRMTTSPGIDRQNHNERANVSX

***Leucoraja erinacea***

>irx\_Leueri

MSFPQLGYQYIAAARPLYPDRQSLSSSRTAGELTASGAASTVLTMYGSPYAAQGYGAFLPYA  
ADLPMFPQLGAQYELKESPNVQHPGFPHHHAAYYPYQGYQFGDPSRPNATRESTSTLKAWL  
NEHRKNPYPTKGEKIMLAIITKMTLTQVSTWFANARRLKKEKQMTWT PRNRTDEEGNSYGS  
E

***Hydra magnipapilata***

>irx\_Hydmag

XLSSSYNKYNNESCSILDYALLASARRKNATKETT SVLKS WLNEHRKNPYPSKSEKVM LAIM  
TKMTLTQVSTWFANARRLKKENKMTWSPRKKSNKSNLKEGSSCSSEPIPEEMDIDIKEQI  
FSAQDCNINTNEENSGKNCIETPFVSAQDTKIQRPSVICVLESPTFDQIKNRF SRDPS PVDH  
LQKWVDGCSQEKPDLDLVCIKDLTPPLTPIDNRVTTFTSQKLF EAFDAAKINKNNDTQ

***Nematostella vectensis***

>irx-Nemvec

MTSYCEIDGYPFKRLRLVKIDVDFELCLMLHGAGNSCCDSVRQVHDGMPGHSVCPCQFDRVL  
QHRVASVPVSVLPRPAFGEAGFSLGSGTGLSAFYSPLARACDMKDSTQPWRDSWYLSQASRA  
PFELHGFDPHTHPACTRFAERFSPIDLAAAGARRKNATRETTSTLKAWLFEHRKNPYPTKGE  
KIMLAAILTKMTLTQVSTWFANARRRLKKNKMTWSPRNRGCEKKDGDVSDIDDDGDLITSL  
DDEEKPSENHDEKVHIQENETENNEKISVIDEAEDKKESDSTRDRESPPREDAKRPNIITSL  
VDTTNQTHSLPKSIPSAILISTAQNHVLDSPVKSLRKWVDGCFYTAPVASYMESSGVAGKPL  
PSTPKQRTSTEIPVITSAPSSQSAEKPERRTSSESKETRPRSPVEKVKEEEPAKASFRPPEP  
SDYGHILSRRGKGEGIKNVLKGADSVNLKVKPTFYIGLVKENGVPQQRNLSEVYPPKQNLII  
ANLFLAERLTDPIEFITHVNSKRPCACARKTARHSELSPCEHPAIANTLLLRSPCYCDHPAI  
ANTLLLRTPCYCEHPAIAITLLLRTPCYCEHPAIANTLLLRSTCYCEHPAIANSLLRFSCY  
CDHPAIAITLLLRSPCYCEHPAIAITLLLRSPYHCEHPAIAITLLLRTPCHCEHPAIANILL  
LRSPCYCDHPAIANTLLLRSPCYCEHLDIANTLLLRTPCYCEHPAIANTLPLRSPCHCDHPA  
IAITLLLRSPRYYGHKYNARGRK

***Suberites domuncula***

>irx-a\_Subdom

MASSPNYNRSENGGLNHLPAASLPLEENLVARGSPSHIENGIPGEHTGRAVVNGQSPSPQRS  
TCSGPRKPRNPAVLVLWIEEHSANPYPTKAEKNFLAHYAGMTTRQLNDWFANARRNIKKIGY  
ETWKEKHSAYSACFSMLRPPTADGSRFTRLAQFPMEIAGGLNGVGPCCSDGLKLASINYGRK  
DAPLPQQAAPTLSVPPNTCGNINSRPFYLLSPQSSLMNVGGTHSQTANTLRQVAMNPAAY  
YEVQHPASAGASIRPVQPASGISLPPSGISFRPMGGANVSLFSSTGRPGSMPPQFTSPISIA  
TPWTDNAAVSDASVVKQERGSVINKPHSPPVQLHVSPLLSTHVQRPPSPKSDTTSNNSPH  
PATDLRPNFASPTTAESTWAATLPLASSSQHLFEDSISGGVGTQLGN

***Amphimedon queenslandica***

>Irxa\_Ampque

MSDQHS~~L~~LAGHSHHHLGSSSLKLSSSSSPSSSSLATGGSGSSGSLSGYSAAGSI~~TRRMRNTAV~~  
~~LVKWI~~EDHQSNPYPTKAEKQYLAYYSGMNMTQLSTWFANARRRIKKIGMKTWLEGRSTFSLD  
YFPTPRASSIGSLDSFTAGSYHGLSSSPYASAAAATYGALTNGLHSSYPSQQNTLLSGGSM  
TSHLTNGLGGTSYDSSTLQPTSSTTPPLSGFYGTRSM~~SLGMPALPVGQWPSTPILSSPPVSF~~  
HSR~~PSSGNTAPLHSP~~LTAVYSADTSLRTHSAQSIDVGDSSYSSLQQHSPDQMLPECASTEP  
MLSDHKSGVTLQN

>Irxb\_Ampque

MRTKCSFENKIRERSTMFFTILMDDLAE~~EEEE~~EKERSMEGLEGSVQLASSR~~RRRR~~DATHLIEW  
LDLHQGNPYPTRVEKEQLVVISGMNFKQLNDWFANARRNIRKVG~~FDRWRK~~NKVTVGGIGGYG  
VHQKHSYVLPEDNGGGGKRRRKEKRSKGGGEDGGKGDIDFNLSPPNVISTRGMQPY~~YYSRSP~~  
HSLVSPHQIQLPAPRPPPPPPSPRARLDCKTAGCGQLPGLSSCPVLHHHPFSHQVQQHVPHP  
IDIGYPLGMAQSTSLSWSSLGLPPYAVGDSWLPHPVQSTTSSLQQQQQQCGYSWKECLKDED  
KDSLS

>Irxc\_Ampque

MILKGPGRVGASMIGEERGSIQRVTTLFIMSIRINQRETT~~HHH~~QQGSKLRNGISLNMSETKS  
SSQGS~~HSVADGSKASQEK~~SSSPG~~SWRNTDVLALWITEHLQLPY~~PGKVEKQYLCFY~~SNMSMK~~  
QVSTYFANARRTIQKKQKNIKRRLSKGSSLFNLFEIITNPKKINKNNPGSEM

>Irxd\_Ampque

EKGSSSPG~~SWRNTDVFALWITEHQ~~QFPYPSKVEKQYLCY~~SNMSMKQVSTYFANSR~~RNIKRR  
L

>Irx~~e~~\_Ampque

RNTYVLEKWMQEHMTRLYPTAEKQCLAHFSRMNTKQNI~~AWFS~~HIGSHISH

***Saccoglossus kowalevskii***

>irx\_Sackov

MSYPLGYPYPTSSQIILMSSVSHSGTSCCESGRPIMTDPHTGQTVCSQCQYDASRAAIMHSRVA  
GLPLMYGSSYTAEQGYVPTFGTDPFAFYSPLNTTYDLKGS AEGGWSATPYQPTACYPYDPAY  
QYYGDRYGGVDINGAARRKNATRETTSTLKAWLYEHRKNPYPTKGEKIMLAIITKMTLTQVS  
TWFANARRRLKKENKMTWSPRNRCGDDRKYDSGDEDDGNENDDDKIDIKDDDEILSDRFDGL  
DTDKEXDDKDNSDDDEDQDHLGGKAETRHSANEDSLSLSPSPLLSQNIIGNSSLLTPATSTT  
SQQQQPPQPPTIKPKIWSLASLAGTSSSPTSPEMSRRSPLLCHQPSASTFHQPHLNTEPNVS  
SLQHWVDGVFHHHHHHHHQOSHLYSSTSR TSAATSVLSYTAQNSLLGNEHSALRSPPGSSN  
MNGDHLPPGGPCRD LAMIAHNSAEAAKYSVAALHPSRDDDLREKSVVHPNDS

***Caenorhabditis elegans***

>irx\_Caele

MIPIANQVKMEEPTTPQTTTPAPPTSAPDALRGILPPNLLGQFHFHPAMAQVLAQAQAAAA  
AQQATLAGFPGVPMFPHGIPADLKPEMLLGGGPGPMPMFFSDAHRLYHPYGLDG IKKRNATR  
EATAPLKDWLHSHRKNPYPSKADKVMLAVGTGMTLTQVSTWFANARRRLKKENKMTWSPQNR  
RGDGCDDDEDDDDDDMNRPSSSTSINSERKGESLFGKPHLASPTPSGGSGGSDELTPPKEL  
VSPINDDSESPKRKPKMWSIADVTSDDSSKKDSPSSDENLLTGSLFQNAMKKQMEVMAR  
LDPTLFRHTMHPFMFQLLAQQAAGQQLALLAPQTPPNEAGEVSR

***Caenorhabditis briggsae***

>irx\_CaeBri

LKVEEPSTPSTTTPAPPSADALRGIIPSNILSQFPLHPAAMAQFLSAQAAAAQPNLVFPGV  
PMFPPGIPADFKPELLMAAGGPGPMPMFGDAHRLYHPYGLDGMKRNATREATAPLKDWLH  
AHRKNPYPSKNDKMLAVGTGMTLTQVSTWFANARRRLKKENKMTWSPQNRGDCDDDEDE  
DDDDMNRPSSSTSINSERKGESLFGKPHLASPTPSGGSGGSDDLQTPKKEQNSIPDDSESPK  
RKPKMWSIADVTTSDDDSSKKDSPSSDENMTSNLLIQSAMKKQMEMFSRIDPNI FRMNPF  
MFQLIAQQAQSQQISLLPSQTPPNEAGE

***Pristionchus pacificus***

>irx\_Pripac

FHPYGMDGVRKNATRETTAPLKGWLSDHRKNPYPTKA EKVM LAFVTKMTLTQVSTWFANAR  
RRLKKNKMTWSPRNRPGE DDDDLADLERPGSSKSDLSDDHNE SNNNENNQSPNGVEDSPRK  
PKSLWSIAD

***Brugia malayi***

>irx\_Brumal

MKPEMIGAVRAVSGYFFDPMYPHYASGLDGTTRKNATRETTAPLKSWLNEHRKNPYPTKAE  
KIMLALLTKMTLTQ

***Trichinella spiralis***

>irx\_Trispi

FSSIIFRANPLDLNAARRKNATRETTAALKSWLYEHRKNPYPTKGEKIMLAIITKMTLTQVS  
TWFANARRRLKKENKMT

***Meloidogyne incognita***

>irx\_Melinc

MSHPPPPFSPLPPPHPSAFPFLDPTTLAAFQPFMVQVQTEHRRKNATREVTAPLKHWLNM  
HRKNPYPTKA EK TLLAVVSTWFANARRRLKKENKMEWSPRERPEDDCDEGDGEEVDVDTEEN  
HHSQNHQQQQGMSDFLMLMSGRHQQQQNLLAQQQWAMFNDQNKNGGIS

***Strongylocentrotus purpuratus***

>irx\_Strpur

MTSYYPQFGFPYPASSQLLMSAAAPATTCCESGRPVASDPHPGQAVCCPPLDSRAALLHSARV  
SGLPTALYSSPYAAAAAEQGYVHFAADPSAFYSPLSSAYADLKGTPEGYAAALAAQQAACYP  
YDPATYQYYGDRYGMDLNGARRKNATRETTSTLKAWLYEHRKNPYPTKGEKIMLAIITKMTL  
TQVSTWFANARRRLKKENKMTWSPRNRCDGTSEDKDDCDSVGDGDDDDARDIDVDVDGDDL  
SKLDGESRLLGKDMDDDDHHRDHRDDEDIRMRLHESARLGLVMRDSVDMADRMDSGPKDSEHG  
ALRDDYRRRSGELLAEHRLSGLNGLDPLRLNTRSRSNPRDNPSDSLQLSRPSSPVRVCGSA  
SPSHDRATPIHDDVNDQDKSSNSVPQNKPKIWSLANTATSSTPAERSRTLFPGLNGRHPAI  
AFASPYDSPMSSLRHVNGQFHGIPLPPGFPLHHSQALALAAGMAHHQFSPHOGTQGAPTSV  
SSAQAPLLATTPHHARYTMSKELASHQSGITASILASIQHQRESESRQHSPSHSSEEMPMRT  
AFKPVQKRPILVSERPSEAAGSPESHREPHREPIRRPIGLSIERLTC

***Trichoplax adhaerens***

>irx\_Triadh

MSYSQFACSFPPQVLMHGHTHSPNHFCSSVPQMTGSTNVCQCQLEKLYMQQKLSPTPYQSM  
HSHQCTANGFPSAISNSNDKPMIYPSMNSPVQGMKCGNSSIDACYQWYMSQAGKYPVGHVD  
GISRFNPIDLNNARRKNATRETTSTLKAWLYEHRKNPYPTKGEKIMLAIMTKMTLTQVSTWF  
ANARRRLKKENKMTWSPRNRTEGRKNSEDDSDQEDLNDDDDDDHTRSDGLSTCADSPASSV  
MDDKSDCGRHSPKLAQEIARRQEKPAIWSPTACSKPSVPCTTTTTLPSNNTNMDSPVKS  
LRKYVDGVFHLKENEVEINVETKVEPASPEPPEKVSVSVEMKSEKEEAVQEKSESQYREFD  
AALALTTLSSSRQS\*

**MKX PROTEINS**

***Drosophila melanogaster***

>MKX\_dromel

MDKSTRPKRNRHRSRRAWPPPEELHPASRATKRLFTPDIKRMLKDWLIRRRRENYPNREEKKQ  
QLAAETGLTYTQICNWFANWRKLNKNSEREKAKKSWGHLIKNYNHNARGNVEQFSISSDSI  
WEEEMHSCPAEDDEGDDNEEFSSHSTGSDGNANNEPSSPYKPIILFVGSAGLTERISAQTGGK  
TKYKHQMMKEYMRDSSSTAKTTSQQGTQLNKWLESAAKFTPDRNNYHIEWNMTRQASSNSSC  
GQAIFTTVDVSGAGRGGRWMLHKKDELEAAEALANLAFNCRQRWHHI

***Culex pipiens quinquefasciatus***

>MKX\_Culpipqui

MEKPSRPVNRNRKRSRKAWPPGDTHRPIKRLFTPEIKRMLKDWLVRRRRENYPNREEKKQ  
LACETGLTYTQICNWFANWRKLNKNSGHDPVKKTWGNLIKNYNDNAKGNVEQFSICSSDSI  
WGEYITSTTTECTPVDFNANTSSIEASFNPAYRAENGTYYLTPSTTVSPAVNYRSTNKYKSS  
IMEKYLPOGSPGLSCELRGPPSLSKWLESTAKFTPSKNNYIDWDQPG

***Aedes aegypti***

>MKX\_Aedaeg

MEKSSRPVNRNRKRSRKVWPPGDIHRPIKRLFTPEIKRMLKDWLVRRRRENYPNREEKKQ  
LAYETGLTYTQICNWFANWRKLNKNSGHDPKKTWGNLIKNYNTNAKGNVEQFSICSEDSI  
WGENGEDSQGSRSPPSGNFSKRSYPTYINGNHSSNNNNNSKAFVNYMKYMERRSSDTSEDDT  
PGTYPGNMFIDHCYTPNNYNAVFGLPVQPQCFQVIID

***Anopheles gambiae***

>MKX\_Anogam



MDKPSRPVRNRKRSRKAWPPGDSHRPVKRLFTPEIKRMLKDWLVRRENYPYPNREEKLLAV  
ETGLTYTQICNWFANWRRKLNKNSGNDPIRKWTGNLIKNYNTNARGNVEQFSICSNDSIWGEN  
GEESQDSRTSSSGEHPYTNRRHHHHHRYHLGHQRQGGQKYESNDNPGNPLPYHVYAEAGDCA  
GDNNNSASCRNNLDCRPFAYMRVPEYGRIEECPSNEGLRDSYPPT

***Bombyx mori***

>MKX\_Bommor

SFEPMTLIQRSCDTKVDAMDRLTNKENNEKPARPVRRRYASFKCFRHSFVAGHRPQKRLFT  
PEIKRYLKDWLVRRRDNPYPNREEKKYLSRETGLTYIQICNWFANWRRKLNANGDRHHLTW  
GHLIRTYNDRAQGNVEQFSICSDDSIWSEPELCSPDQNSLENEVILTDSPPSSGLYEKETEAA  
LKDRCDNLNNSYSFDHDSPOKPNKAVTSPVLLSKWLESAARFQPSEINYSWWADEKRRRPE  
AKAQRVALNNMIRHDRDEVEAA

***Tribolium castaneum***

>MKX\_Tricas

MVKYPQDRPDASTLLKSITHNSDADYVRELECKLAERDEEILRLKELLKSAEKMDTRIAEVN  
RERSRPVRNKRYTRRGYGELDKRPPKRLFTPEIKRFLKDWLVRRENYPYPNRDEKKNLALQ  
TGLTYIQVCNWFANWRRKLNAGKEPQRKTWGDLIKSYNSQVQGNVEHFSICSDDSIWEEP  
SDESPPDHSYTTFEHDNNRYFANS PERE IENPFSQAKYKNHIMEKYLRDCQKPDVVKPSM  
ITKWLES AVNFTPSENNYVHWTFSKNQKKKKEVASQVCHGREELDAAEALTRLANARAFKA

***Pediculus humanus corporis***

>MKX\_Pedhumcor

FFFFFFWIFKMAHNIESDKGDLNKINKFNIGRILRNRQYKRPLLDPRPTKRLFTPEIKRHLKSW  
LVRRENYPYPNREEKIELAAQTGLTYIQICNWFANWRRKLNKNSGKNINKFTWSNLIKSYNDQ  
AMGNVEHLSISSNDSIWDETDIDKSDKNQIKRYLPDNDYPDDCPTFFRVGVKNNINNCNLSC  
FSKPEQTNKSDYLPQCFQISSTSDFLKPPKINDNSNKKTNLKKSRQLNKKFNDTTKKHFN  
KPVRDKNWNYKMMINDVNTGTDQKNILRTNNKCRLGNNSLLTKWKKSAALFQPNKKKYST  
VEFIQKKSNGFLIKFDHFGREELDAAEALFSLRASSNNL

***Strongylocentrotus purpuratus***

>MKX\_Strpur

MAEKVRHQRQTMKSMARPLKQWLYHHKDYPYPNRKEKLLLSMESTMTLVQVSNWFANARRRL  
KNTVHDPAMSWEKRIHKYNKHVGTGNAERLSSISSVSSGGDDFDDEEFNGFESDDSSVTNYA  
QDVTSTNELQGANHNHNATHPGICSPHPLSSVPPIASHSDHQQSLPTHKYKHSIMQRYL  
NDTYNHAQQRQAEASTVAASMDSSHTLLPEENSLNLPNYTDRTAGRLTGQEWKFRASGSVN  
SHEYERMSTSPETTMSSSIGSYRQRHCSEDYSLSSSSNDWTSFLKDTKSTDFKNEEDEETYW  
QEIVAAVALTNMAR

***Xenopus tropicalis***

>MKX\_Xentro

MNAIVFNKLSGQVLFEEESPNDREGRVRYLGMESPNADVGLQDGISIKDNASLRHRRPGSS  
RGASGKVRHQRQALQDMARPLKQWLYKHRDNPYPTKTEKILLALGSQMTLVQVSNWFANARR  
RLKNTVRQPDLSWALRIKLYNKYVQNAERLSVSSSEDSCSEDGENAPRSHHNEEAYDKPIHH  
TVITKESSVIKSGVRAESSASEDYVSPPKYKSSLLHRYLNDLSLRHVMASNAAMREKTRQRNH  
SGSFSSNEFEEELVSPSSSETEGNFVYRTAQMCFFHFKKSSAVNKEGASKDETYWREINAAM  
ALTNLAQGGKDKLQGTTCIIQKSSHISEVKTVKVALLHKY

***Tetraodon nigroviridis***

>MKX\_Tetnig

MNAIVFNELSGQVLFEEKANEVEMSSRNYLDVIDGQHPDLLSSKQTMRESQAMRHRRSGGRP

SGGKVRHHRQALQDMARPLKQWLYKHRDNPYPYTKTEKILLALGSQMTLVQVSNWFANARRRL  
KNTVRQPDLSWALRIKLYNKYVQGNAERLSSISSDDSCSEDGDNPQMAQSSSEELNKPMYQSV  
IKKEGSAMVAMGAGLRSAAEATALGEDYVSPPKYKSSLLHRYLNDSL RHVMVANAVMEARKR  
NHSGSFSSNEYDDELLSPSSSEAEANFVYRAEQHPSIKNSPACCPALFAPFLLSLAPSPRWD  
VKVVQKEKMKGRDETYWREINAAMALTNLAQSKDSTSGTTSCIIQKSSHIAEIKTVKVPLMQ  
KY

***Mus musculus***

>MKX\_Musmus

MNTIVFNKLGGAFLFEDRGTDPDRERGSRTFSGFLDNPHGTGPEVGI PDGPPKLDNLSLRHRRT  
GARQNGGKVRHHRQALQDMARPLKQWLYKHRDNPYPYTKTEKILLALGSQMTLVQVSNWFANA  
RRRLKNTVRQPDLSWALRIKLYNKYVQGNAERLSVSSDDGSCSEDGENPPRNHMNEEGYSTP  
AHHTVIKGESSAIKAGRPESRAAEDYVSPPKYKSSLLNRYLNDSL RHVMATSTAMMGKTRR  
RNHSGSFSSNEFEEELVSPSSSETEGTFVYRTDTPDIGSTKGDSAANRRGPKDDTYWKEIN  
AAMALTNLAQGKDEVQGT TTTSCIIQKSSHIAEVKTVKLVQRF

***Homo sapiens***

>MKX\_Homsap

MNTIVFNKLS SAVLFEDGGASERERGRPYSGVLDSPHARPEVGI PDGPPKLDNGLRHRRT  
GARQNGGKVRHHRQALQDMARPLKQWLYKHRDNPYPYTKTEKILLALGSQMTLVQVSNWFANA  
RRRLKNTVRQPDLSWALRIKLYNKYVQGNAERLSVSSDDGSCSEDGENPPRTHMNEGGYNTPV  
HHPVIKSENSVIKAGVRPESRASEDYVAPPKYKSSLLNRYLNDSL RHVMATNTTMMGKTRQR  
NHSGSFSSNEFEEELVSPSSSETEGNFVYRTDTLENGSNKGESAAANRKGPSKDDTYWKEINA  
AMALTNLAQGKDKLQGT TTTSCIIQKSSHIAEVKTVKLVQRF

***Gallus gallus***

>MKX\_Galgal

MNTIVFSKLSGQVLFEEEDAKERERGRPYVGVVEGPHHAEVLLPDSPSIKESLSLRNRRTGA  
RQSGGKVRHHRQALQDMARPLKQWLYKHRDNPYPYTKTEKILLALGSQMTLVQVSNWFANARR  
RLKNTVRQPDLSWALRIKLYNKYVQGNAERLSVSSDDGSCSEDGENPPRNHMNEGGYNKPVHH  
TVIKTESSVIKTGVRPETSANEDYVSPPKYKNSLLNRYLNDSL RHVMATNAAMMEKTRQRNH  
SGSFSSNEFEEELVSPSSSETEGNFVYRTETLENGPNKCESAAANRKGTSKDETYWKEINAAM  
ALTNLAQGKDKLQGT TTTSCIIQKSSHISEVKTVKLVQRF

***Brachydanio rerio***

>MKX2\_Brarer

MNTAVFSKFDQLRFEESGQNVERSRSYLELIDGQRSDLLTSHKVMGNDALKHRRNGGGKV  
RHRQALQDMARPLKQWLYKHRDNPYPYTKTEKILLALGSHMTLVQVSNWFANARRRLKNTVR  
QPDLSWALRIKLYNKYVQGNAERLSSISSDDTTSDDGENNLQMQASESDYNRAVHKSVIQDSR  
VKVGRNADPSVCDYVSPPKYKNSLLNRYLNDSL RHVMASDKVMSRKRNHSGSFSSNEYED  
DFLSPSSSEAEANFTYHTVTLDCGTRQSESGARKGGNNETYWKELHAAMALTNLAQVKESSAA  
GTTSCIIQKSSHIAEIKTVKVPPIQPRH

***Brachydanio rerio***

>MKX1\_Brarer

MNTIVFNKLS SQVLFEEKANEVERSSRNYLEVIDGQHPDLLSSSPVLKDS SAIRHRRSGSRQ  
NPGKVRHHRQALQDMARPLKQWLYKHRDNPYPYTKTEKILLALGSQMTLVQVSNWFANARRRL  
KNTVRQPDLSWALRIKLYNKYVQGNAERLSVSSDDSCSDDADPATRAQVGEFSKPMYQSVIK  
KEGGMGAGLRAASDASLADDYVSPPKYKSSLLHRYLNDSL RHVMGANGVMDARKRNHSGSF  
SSNEYDEDLLSPSSSEAEANFIYRTETVEHGSNKCDLQKEKGQRKDETYWREINAAMALTN  
LAQPKGTATAGTT TTTSCIIQKSSHIAEIKTVKVP LLHKY

***Lottia gigantea***

>MKX\_Lotgi

MRRLFPEKIHHKRQTLQDMARPLKRWLYENRDNYPYPTKEQKHS LAVNSHMSLVQISNWFANA  
RRRLKKNVVKPELSWSERVELYNQYVEGDAELFSISSEDEDFDEDEDVQNDDETFQNTLV  
ISHTDLNSDSLVP SRTTTPTFDQRSTVFASTTSLKHKQTI LQRYFNDNAYIDAMGFHP PSEG  
DPQRVINVAELVWNRDRHQSGSLGSQDY EEMSTSSASSRIQHRI LDDFP EEQELPT YRITQ  
HHSFHDDSDMRQKEMDAVFALTSLANSHRSK LQENVT PERSNFRM

***Capitella Sp I***

>MKX\_CapspI

MSDLDKLQALMSEYLRNGVDAQQLYQYYSQHVMYHHLQQAREK GELKEEVFPQPPI TELMLP  
KVPSEAKEFESVGADFDNKSSVDRAEDIEVLDSAF AEWSVNLSDSVCGKCSERKDDES YMKR  
RRRPVVS LDRVRHKRQTLQDMARPLKHWLYKHRDNYPYPTKSEKMTLANVSHMTLTQVSNWFA  
NARRRLKNTVRDPELWESRIKMYNSCVEGNQELLSIDSD DDEEEMKAPPQPT EAEAVASEE  
EAATPLDLS DHTVPGEAIPSPAPSPMHTDEAPHPKYKQCILQRYLTDSYQHAAQMONEFP  
RQRNASGSLSSH DYEEI STSFAGSPLREHQFDEQQEMAEELPAKVENASRKLSPAESRYSAF  
DKELLGAYLSVRHFQPI IERRVCTLM TDHRPLALAWNKQSDPWSARQQRHLSAIAHVCHRSG  
ASNTGADCLSRALTPQVSLTSLNPEAVLDVQRSSDDI IAVAEGRSHNPLDNVSRSRHRLCSP  
RRQPRLLP HRQRLQSLPLPDDAIPX

***Helobdella robusta***

>MKX\_Helrob

MEDKRNNFIQQYQQSQQQPQTYSRDQPM SNKQQQQQQQFDSKLYIRHNYNRKRHASKRRSS  
SSSASTASETGERDSLKRRRFTKQNSTGQSQQPENGKQ ESENCRDTRLRLTDRWSNDESVPCC  
LKNKLEMTNNGNDGDKDENEINETNSKRRKENC DTAKQTPNQKEIKNGRPTAPTENIANIK  
EEPLDDYSNSEESQRYQSSPGRQIKPQPQHSLPTFKADFS PDYRVPVRPIIPTAPMFPFNP NL  
PFHLNYSFFSDY PFPASHPYFLQIMRPSTTLPN FSLPSSSSPPSASATSPASSSAKCTPLF  
SSSTSLTSFSEQQQQKPTT LSSSLSTPSSSSSSSSTLVNPPVTPNNTAKLRWLTDHMDHPYP  
TKGDKIMLAVLCKMTLTQVSTW FANARRMKGKGGDGSDDLEEERKDSSSLT LSPSTFSSSS  
LSPLTSSFSISFSSTSTPSTSASTVSSYPDSISHASAF LFPQIPSSNCFPRSFDQFSRPCYFS  
NIYNPYFTRLPGFNPNLHANHFIDYK PQTQQVPSQNSTNNSVRPPWPAKKRNKVWSIKDILG  
SS

***Petromyzon marinus***

>MKX\_Petmar

MGEEEKRMLAAPSSLEGLPTAKRVALWLSSAGSLWAE EQSAAEQPRLSHARARRAHQTPGH  
GVVGIKHHGKAENTVSAVTGAHTNVCDRLG SERIRASLPLSPRPGPAMNVVDVFRHGPKEV  
RLEGRQLSSAHQ GALAAHGQLLQLYPAGQSAQRCSGAATSASHLISSPSRMTPGDIPPGPFL  
LLAVPTRQCI FKRGGVLNLEAHQLVKHQTDGIVACDRHYGRRRSGALRVRHKRQALQDMARP  
LKHWLYKHRHNPYPTKTEKILLALGSHMTLVQ

***Branchiostoma floridae***

>MKX\_Braflo

MVSSAPDGGK KWSRQEMCGTSGGIDHGGDRVYVNELRVSRKSPASVYLWVLQQTRGLRICGS  
RPRGSVVRPETERCAGICVLPVVG ERERVSA GWKVNKLENMVDCTTENELTIVSDSSSEF  
SEDDLEYGGGGADGVLKVSSMTSKDLEERDRSLRRRSRRRNSDRVRHKRQVMQDMARPLKQ  
WLIKHRDNYPYPTKTEKILLALTSQMTLVQVSNWFANARRRLKNTVRDPDL SWGMRIKLYNKH  
VQGNAELLSISSGDDSEDDFDGSDYGDHDGSGKGNLIIPHFKGDRDENSNNSSLPPSP TED  
LDHRYAIPRYPDSGEEPSSPTKYKHSILQRYLND SFHSTARRNDKSGSLSSQDYEDLSE SAR  
SFRSSFGSDG SVRLSPTSEGEPRSSPVFEDEELHWKEIDAAMALTS LARSRGCP\*
