# Supplementary material for: Evolutionary history of the iroquois/Irx genes in metazoans
Source: PubMed Central journal article supplement (PMC2674049; doi:10.1186/1471-2148-9-74), 2009-04-15
Supplement: 1471-2148-9-74-S2.pdf [file 1471-2148-9-74-S2.pdf]

TALE-class Homeodomain

|                 |                                                                             |
|-----------------|-----------------------------------------------------------------------------|
| irx2_Aedaeg     | SYREAYEYGDSDNDWRGSNNTARRKNATRESTATLKAWLNEHKKNPYPTKGEKIMLAIITKMTLTOVSTW      |
| irx6_Galgal     | -----GTRRKNATRETTSTLKTWLYEHRKNPYPTKGEKIMLAIITKMTLTOVSTW                     |
| irx-c_Petmar    | -----VADPAFRKNATRDATATLKAWLNEHRKNPYPTKGEKIMLAIITRMTLTOVSTW                  |
| irx2_Schmed     | DNVSNLIYKNIYVPPDFPNAPRRKNATRETTSTLKAWLNEHKKNPYPTKGEKIMLAIITKMTLTOVSTW       |
| irx3_Schmed     | -----MNSHPRKNATRETTSTLKAWLNEHKKNPYPTKGEKIMLAVITKMTLTOVSTW                   |
| irx_Caelele     | GPMPMFFSDAHRLYHPYGLDGIKKRNATREATAPLKDWLHSHRKNPYPSKADKVMVAVGTGMLTOVSTW       |
| irx1_Capspl     | WPYDPSNMTGYPYGASYGGLDVRKNATRETTSTLKAWLNEHKKNPYPTKGEKIMLAIITKMTLTOVSTW       |
| irx-b_Petmar    | -----DSGRRLGSKAATRETTSTLKAWLSEHRKNPYPTKGEKIMLAVTKMTLTOVSTW                  |
| irx1_Schmed     | DNSAWANPYGYIGNPTLTLNSARRKNATRETTSTLKAWLQEHKKNPYPTKGEKIMLAIITKMTLTOVSTW      |
| irx1_Musmus     | FAAHTTPAYYPYG-OFQYDGPGRPKNATRETTSTLKAWLNEHRKNPYPTKGEKIMLAIITKMTLTOVSTW      |
| irx1_Homsap     | FAAHTAPAYYPYG-OFQYDGPGRPKNATRETTSTLKAWLNEHRKNPYPTKGEKIMLAIITKMTLTOVSTW      |
| irx1_Galgal     | FAAHTAPGYYPYG-OFQYDGPGRPKNATRETTSTLKAWLNEHRKNPYPTKGEKIMLAIITKMTLTOVSTW      |
| irx1_Xentro     | FAAHTTPGYYPYG-OFQYDGPGRPKNATRETTSTLKAWLNEHRKNPYPTKGEKIMLAIITKMTLTOVSTW      |
| irx1a_BRARER    | FAAHTSPAFYPYG-OFQYDGPGRPKNATRETTSTLKAWLNEHRKNPYPTKGEKIMLAIITKMTLTOVSTW      |
| irx1b_BRARER    | FVHAAPGFYPYG-OFQYDGPGRPKNATRETTSTLKAWLQEHKKNPYPTKGEKIMLAIITKMTLTOVSTW       |
| CAF99496_Tetnig | LPVHAAGFYYPYG-OFQYDGPGRPKNATRETTSTLKAWLQEHKKNPYPTKGEKIMLAIITRMTLTOVSTW      |
| irx3_Musmus     | AFPHHPAFYPYG-OFQYDGPGRPKNATRETTSTLKAWLNEHRKNPYPTKGEKIMLAIITKMTLTOVSTW       |
| irx3_Homsap     | AFPHHPAFYPYG-OFQYDGPGRPKNATRETTSTLKAWLNEHRKNPYPTKGEKIMLAIITKMTLTOVSTW       |
| irx3a_BRARER    | -FAHHHPAFYPYG-OFQYDGPGRPKNATRETTSTLKAWLSEHRKNPYPTKGEKIMLAIITKMTLTOVSTW      |
| CAG14759_Tetnig | -FAHHHPAFYPYG-OFQYDGPGRPKNATRETTSTLKAWLSEHRKNPYPTKGEKIMLAIITKMTLTOVSTW      |
| irx3_Xentro     | -FSPHHPAFYPYG-OFQYDGPGRPKNATRETTSTLKAWLNEHRKNPYPTKGEKIMLAIITKMTLTOVSTW      |
| irx3b_BRARER    | ---FPHAAFYPYGHOFQYDGPGRPKNATRETTSTLKAWLSEHRKNPYPTKGEKIMLAIITKMTLTOVSTW      |
| irx-a_Petmar    | ---FPYPTAAYSPYGGFOYDPSRPNATRETTSTLKAWLNEHRKNPYPTKGEKIMLAIITKMTLTOVSTW       |
| irx7_BRARER     | ---RGGPYTPYRPIPADPSPRVTKVATRETTSTLKAWLSEHLLKPNPYPTKGEKIMLAIITKMTLTOVSTW     |
| CAG03859_Tetnig | ---RGAAPFPYRHRGAVEDPGRVAVATRETTSTLKAWLNEHLLKPNPYPTKGEKIMLAIITKMTLTOVSTW     |
| irx2_Acypis     | GYHYDSTLAAYGYSAGYDLAARRKNATRETTSTLKAWLNEHKKNPYPTKGEKIMLAIITKMTLTOVSTW       |
| irx2_Pedumcor   | -----XYSAGYDLAARRKNATRETTSTLKAWLNEHKKNPYPTKGEKIMLAIITKMTLTOVSTW             |
| caup_Dromel     | GYYSYDPTLAAYGYGPNYDLAARRKNATRETTSTLKAWLSEHKKNPYPTKGEKIMLAIITKMTLTOVSTW      |
| irx_Calvic      | GYYSYDPTFAAYG-YGASYDLAARRKNATRETTSTLKAWLNEHKKNPYPTKGEKIMLAIITKMTLTOVSTW     |
| ara_Dromel      | GYYSYDPMASAYGGYGASYDLAARRKNATRETTSTLKAWLNEHKKNPYPTKGEKIMLAIITKMTLTOVSTW     |
| irx2_Tricas     | GYYPYDPLAAYGYGAGYDLAARRKNATRETTSTLKAWLNEHKKNPYPTKGEKIMLAIITKMTLTOVSTW       |
| irx2_Culpipqui  | -----OTTTPATKSETARRKNATRETTSTLKAWLNEHKKNPYPTKGEKIMLAIITKMTLTOVSTW           |
| irx2_Helera     | GYYPYDPTLAAYGYGAGYDLAARRKNATRETTSTLKAWLNEHKKNPYPTKGEKIMLAIITKMTLTOVSTW      |
| irx_Spofru      | GYYPYDPTLAAYGYGAGYDLAARRKNATRETTSTLKAWLNEHKKNPYPTKGEKIMLAIITKMTLTOVSTW      |
| irx2_Bommor     | GYYPYDPTLAAYGYGAGYDLAARRKNATRETTSTLKAWLNEHKKNPYPTKGEKIMLAIITKMTLTOVSTW      |
| irx2_Anogam     | GYYPYDPTLAAYGYGAGYDLAARRKNATRETTSTLKAWLNEHKKNPYPTKGEKIMLAIITKMTLTOVSTW      |
| irx2_Nasvit     | GYYPYDPTLAAYGYGAGYDLAARRKNATRETTSTLKAWLNEHKKNPYPTKGEKIMLAIITKMTLTOVSTW      |
| irx2_Apimel     | GYYPYDPTLAAYGYGAGYDLAARRKNATRETTSTLKAWLNEHKKNPYPTKGEKIMLAIITKMTLTOVSTW      |
| irx2_Dappul     | GYYPYDPLAAYGYGASYDLAARRKNATRETTSTLKAWLSEHKKNPYPTKGEKIMLAIITKMTLTOVSTW       |
| irx3_Capspl     | YFPAYELAGFPYHNGFALDPNARRKNATRETTSTLKAWLNEHRKNPYPTKGEKIMLAIITKMTLTOVSTW      |
| irx2_Capspl     | DIHGSYOYLSOAYASLDP-----RRKNATKESNTTLKAWLYEHKKNPYPTKGEKIMLAIITRMTLTOVSTW     |
| irx1_Lotgig     | DTPMSSFPYSNAYGSVDLNSATRRKNATRETTSTLKAWLYEHKKNPYPTKGEKIMLAIITKMTLTOVSTW      |
| irx1_Aedaeg     | HPYDAAFG-YPFNSYGMDLNGARRKNATRETTSTLKAWLNEHKKNPYPTKGEKIMLAIITKMTLTOVSTW      |
| irx1_Culpipqui  | -----SYGMDLNGARRKNATRETTSTLKAWLNEHKKNPYPTKGEKIMLAIITKMTLTOVSTW              |
| irx1_Anogam     | HPYDAAFG-YPFNSYGMDLNGARRKNATRETTSTLKAWLNEHKKNPYPTKGEKIMLAIITKMTLTOVSTW      |
| irx1_Bommor     | -----MDLNGARRKNATRETTSTLKAWLNEHKKNPYPTKGEKIMLAIITKMTLTOVSTW                 |
| irx1_Apimel     | HPYDAAFASYPFNGYGMDLNGARRKNATRETTSTLKAWLNEHKKNPYPTKGEKIMLAIITKMTLTOVSTW      |
| irx1_Nasvit     | HPYDAAFASYPFNGYGMDLNGARRKNATRETTSTLKAWLNEHKKNPYPTKGEKIMLAIITKMTLTOVSTW      |
| irx1_Helera     | HPYDAAFAGYPFNGYGMDLNGARRKNATRETTSTLKAWLNEHKKNPYPTKGEKIMLAIITKMTLTOVSTW      |
| irx1_Tricas     | HPYDTAFAGYPFNGYGMDLNGARRKNATRETTSTLKAWLNEHKKNPYPTKGEKIMLAIITKMTLTOVSTW      |
| irx1_Acypis     | HPYDAAFG-YPFNGYGMDLNGARRKNATRETTSTLKAWLNEHKKNPYPTKGEKIMLAIITKMTLTOVSTW      |
| irx1_Pedumcor   | -----MDLNGARRKNATRETTSTLKAWLNEHKKNPYPTKGEKIMLAIITKMTLTOVSTW                 |
| mirr_Dromel     | HPYDAAFAGYPFNSYGMDLNGARRKNATRETTSTLKAWLNEHKKNPYPTKGEKIMLAIITKMTLTOVSTW      |
| irx1_Dappul     | HPYDPAAMAAYPFGYGMDLNGARRKNATRETTSTLKAWLSEHKKNPYPTKGEKIMLAIITKMTLTOVSTW      |
| irx4_Lotgig     | HPYNTFYAGLDLNSA-----ARRKAATRETTSTLKAWLSEHRKNPYPTKAEKIMLAIITKMTLTOVSTW       |
| irx_Mytcal      | HPYASFYGGLDLNNA-----ARRKNATRETTSTLKAWLYEHRKNPYPTKGEKIMLAIITKMTLTOVSTW       |
| irx2_Lotgig     | YPYGPYGGGLDLN-----ARRKNATRETTSTLKAWLNEHKKNPYPTKGEKIMLAIITKMTLTOVSTW         |
| irx3_Lotgig     | YPYGAGFGGLDLN-----SRRNATRETTSTLKAWLYEHRKNPYPTKGEKIMLAIITKMTLTOVSTW          |
| irx_Sackov      | -YDPAYQYQYGDYGGVDINGAARRKNATRETTSTLKAWLYEHRKNPYPTKGEKIMLAIITKMTLTOVSTW      |
| irx_Strpur      | YDPATYQYQYGDYGM-LNLN-GARRKNATRETTSTLKAWLYEHRKNPYPTKGEKIMLAIITKMTLTOVSTW     |
| irx4_Musmus     | YEPALSOYQYDRYG--TVDSGTRRKNATRETTSTLKAWLQEHKKNPYPTKGEKIMLAIITKMTLTOVSTW      |
| irx4_Homsap     | YEPALGOYQYDRYG--TMDSGTRRKNATRETTSTLKAWLQEHKKNPYPTKGEKIMLAIITKMTLTOVSTW      |
| irx4_Galgal     | YEHSLSOYQYDRYG--AMDGSTRRKNATRETTSTLKAWLQEHKKNPYPTKGEKIMLAIITKMTLTOVSTW      |
| irx4_Xentro     | YEHTLSOYQYDRYG--TMDGSTRRKNATRETTSTLKAWLQEHKKNPYPTKGEKIMLAIITKMTLTOVSTW      |
| irx4a_BRARER    | YDPTLGOYQYDRYG--SMEGSTRRKNATRETTSTLKAWLQEHKKNPYPTKGEKIMLAIITKMTLTOVSTW      |
| irx4a_Tetnig    | YDPTLGOYQYDRYG--SMGSTRRKNATRETTSTLKAWLQEHKKNPYPTKGEKIMLAIITKMTLTOVSTW       |
| irx4b_BRARER    | YDYPYIGQYQYDRYGYGSDVGTTRRKNATRETTSTLKAWLQEHKKNPYPTKGEKIMLAIITKMTLTOVSTW     |
| irx4b_Tetnig    | YEYFPQYQYPERYSYSCADGASRRKNATRETTSTLKAWLQEHKKNPYPTKGEKIMLAIITRMTLTOVSTW      |
| irx6_Musmus     | YETTLGOYQYDRYGGVELSSAGRRKNATRETTSTLKAWLQEHKKNPYPTKGEKIMLAIITKMTLTOVSTW      |
| irx6_Homsap     | YEHSLGOYQYERYGAVELSGARRKNATRETTSTLKAWLNEHRKNPYPTKGEKIMLAIITKMTLTOVSTW       |
| irx6a_BRARER    | YDHSLSGOYQYDRYGTVDVFNSTRRKNATRETTSTLKTWLYEHRKNPYPTKGEKIMLAIITKMTLTOVSTW     |
| Irx6a_Tetnig    | YDHSLSGOYQYDRYGTVDVFNSTRRKNATRETTSTLKTWLYEHRKNPYPTKGEKIMLAIITKMTLTOVSTW     |
| irx6_Xentro     | YEHSLSGOYQYDRFGAVDISCSSRRKNATRETTSTLKTWLYEHRKNPYPTKGEKIMLAIITKMTLTOVSTW     |
| irxA_Braflo     | -----AGGAPYPYGSYAAMDGARRKNATRETTATLKAWLMEHRKNPYPTKGEKIMLAIITKMTLTOVSTW      |
| irxB_Braflo     | ---LAAGAQYHPYGGYGM-DGTTPRKNATRDATSTLKAWLNEHKKNPYPTKGEKIMLAIITKMTLTOVSTW     |
| irx-d_Petmar    | -----VTRRKNATRDATATLKAWLNEHRKNPYPTKGEKIMLAIITRMTLTOI STW                    |
| irx2_Musmus     | -----AAYPYQLNDPAYRKNATRDATATLKAWLNEHRKNPYPTKGEKIMLAIITKMTLTOVSTW            |
| irx2_Homsap     | -----AAYPYQLNDPAYRKNATRDATATLKAWLNEHRKNPYPTKGEKIMLAIITKMTLTOVSTW            |
| irx2_Galgal     | -----PAYPYQLNDPAYRKNATRDATATLKAWLQEHKKNPYPTKGEKIMLAIITKMTLTOVSTW            |
| irx2_Xentro     | -----AAYPYQLNDPAYRKNATRDATATLKAWLQEHKKNPYPTKGEKIMLAIITKMTLTOVSTW            |
| irx2a_BRARER    | -----PGYPYQLNDPAYRKNATRDATATLKAWLQEHKKNPYPTKGEKIMLAIITKMTLTOVSTW            |
| irx2_Tetnig     | -----PGYPYQLNDPAYRKNATRDATATLKAWLQEHKKNPYPTKGEKIMLAIITKMTLTOVSTW            |
| irx5_Musmus     | -----PLGSYPYQDPAYRKNATRDATATLKAWLNEHRKNPYPTKGEKIMLAIITKMTLTOVSTW            |
| irx5_Homsap     | -----PLGSYPYQDPAYRKNATRDATATLKAWLNEHRKNPYPTKGEKIMLAIITKMTLTOVSTW            |
| irx5_Galgal     | -----PLGSYPYQDPAYRKNATRDATATLKAWLNEHRKNPYPTKGEKIMLAIITKMTLTOVSTW            |
| irx5_Xentro     | -----PLGSYPYQDPAYRKNATRDATATLKAWLNEHRKNPYPTKGEKIMLAIITKMTLTOVSTW            |
| irx5a_BRARER    | -----PLGSYPYQDPAYRKNATRDATATLKAWLNEHRKNPYPTKGEKIMLAIITKMTLTOVSTW            |
| irx5a_Tetnig    | -----PLGSYPYQDPAYRKNATRDATATLKAWLNEHRKNPYPTKGEKIMLAIITKMTLTOVSTW            |
| irx5b_BRARER    | -----PLGSYPYQDPAYRKNATRDATATLKAWLNEHRKNPYPTKGEKIMLAIITKMTLTOVSTW            |
| irx5b_Tetnig    | -----PLGSYPYQDPAYRKNATRDATATLKAWLSEHRKNPYPTKGEKIMLAIITKMTLTOVSTW            |
| irxNemvec       | THPACTRFAERFSPIDLAAGARRKNATRETTSTLKAWLFEHRKNPYPTKGEKIMLAIITKMTLTOVSTW       |
| irx_Triadh      | YPVGHVDGISRFPNIDLN--NARRKNATRETTSTLKAWLYEHRKNPYPTKGEKIMLAIITKMTLTOVSTW      |
| irx4_Schmed     | NLNPITLAHLHTINHADVNOIOVKNATRENSSTLKAWLQEHKKNPYPSKGEKILLAILTQMSLTOVSTW       |
| irx_Hydmag      | ---YKNYNEESCSILDYALLASARRKNATRETTSTLKSWLNEHRKNPYPSKSEKVMYLAITKMTLTOVSTW     |
| irxA_Ampque     | ---LATGGSSGSSGSLGYSAGSITRRMKNATRETTAVLVKWI EDHOSNYPYPTKAEKQYLAYSGNMNTLQVSTW |
| irxe_Ampque     | -----RNTYVLEKWMQEHMTRLYPTAEKQCLAHFSRMTNKONIAW                               |
| irx-a_Subdom    | ---HTGRAVNVGOSPPORSTCSGPRKPRNPVAVLVLWIEHSANPYPTKAEKNFLAHYAGMTTRQLNDW        |
| irxc_Ampque     | ---QGHSHVADGSKASQEKGSSSPGSRNTDVLALWITEHLQLPYGPVKEOYLCPYSNMSMKOVSTW          |
| irxd_Ampque     | -----EKGSSSPGSRNTDVFALWITEHOOPYPSKVEKOYLCYYSNMSMKOVSTY                      |
| irxb_Ampque     | ---SMEGLEGSVOLASSRRRRRDATHLEWLDLHQGNPYPTRVEKEQLVVISGNMFKQLNDW               |

|                 | TALE-class Homeodomain | IROA                             | acidic region                | IRO box |
|-----------------|------------------------|----------------------------------|------------------------------|---------|
| irx2_Aedaeg     | FANARRRLKKNKMTWEPKNT   | DDDDDDAMVSDDEKDKDDMDPKSRDHKVOGHP | RLFFRIPYFRLPNFRGEKKGSTT      |         |
| irx6_Galgal     | FANARRRLKKNKMTWSPKNA   | AGEERKEDGTRHDGEYG                | SVTGKIPRIDGEOIPGAEHGEGE      |         |
| irx-c_Petmar    | FANARRRLKKNKMTWTKARS   | DEELEDDDNDGSGGKELGDS             | SGGGGGRLRPLPAPGNLNVYQT       |         |
| irx2_Schmed     | FANARRRLKKNKMTWARTR    | HEDDIDETGDDDEDDDEEDN             | DDDDISSEKETSNSKIWSIAE        |         |
| irx3_Schmed     | FANARRRLKKNKMTWSPNQK   | SEDEADDDLEDTSSDIRSRLODD          | PASLTNPKSKSTKPKIWSIADITSDN   |         |
| irx_Caelel      | FANARRRLKKNKMTWSPNRR   | GDGDDDEDDDDMRPSSSTSINS           | ERKGESPKRKPMMWSIADVTSDD      |         |
| irx1_Capspl     | FANARRRLKKNKMTWSPRNR   | AGDDDDDKNSDDDDDDDKGDSN           | NNDDAKTEDEDVVVDGVFTLYECIFDAN |         |
| irx-b_Petmar    | FANARRRLKKNKMTWSPKNA   | AGEERKEDGTRHDGEYG                | SVTGKIPRIDGEOIPGAEHGEGE      |         |
| irx1_Schmed     | FANARRRLKKNKMTWTKARS   | DEELEDDDNDGSGGKELGDS             | SGGGGGRLRPLPAPGNLNVYQT       |         |
| irx1_Musmus     | FANARRRLKKNKMTWTKARS   | DEELEDDDNDGSGGKELGDS             | SGGGGGRLRPLPAPGNLNVYQT       |         |
| irx1_Homsap     | FANARRRLKKNKMTWTKARS   | DEELEDDDNDGSGGKELGDS             | SGGGGGRLRPLPAPGNLNVYQT       |         |
| irx1_Galgal     | FANARRRLKKNKMTWTKARS   | DEELEDDDNDGSGGKELGDS             | SGGGGGRLRPLPAPGNLNVYQT       |         |
| irx1_Xentro     | FANARRRLKKNKMTWTKARS   | DEELEDDDNDGSGGKELGDS             | SGGGGGRLRPLPAPGNLNVYQT       |         |
| irx1a_BRARER    | FANARRRLKKNKMTWTKARS   | DEELEDDDNDGSGGKELGDS             | SGGGGGRLRPLPAPGNLNVYQT       |         |
| irx1b_BRARER    | FANARRRLKKNKMTWTKARS   | DEELEDDDNDGSGGKELGDS             | SGGGGGRLRPLPAPGNLNVYQT       |         |
| CAF99496_Tetnig | FANARRRLKKNKMTWTKARS   | DEELEDDDNDGSGGKELGDS             | SGGGGGRLRPLPAPGNLNVYQT       |         |
| irx3_Musmus     | FANARRRLKKNKMTWTKARS   | DEELEDDDNDGSGGKELGDS             | SGGGGGRLRPLPAPGNLNVYQT       |         |
| irx3_Homsap     | FANARRRLKKNKMTWTKARS   | DEELEDDDNDGSGGKELGDS             | SGGGGGRLRPLPAPGNLNVYQT       |         |
| irx3a_BRARER    | FANARRRLKKNKMTWTKARS   | DEELEDDDNDGSGGKELGDS             | SGGGGGRLRPLPAPGNLNVYQT       |         |
| CAG14759_Tetnig | FANARRRLKKNKMTWTKARS   | DEELEDDDNDGSGGKELGDS             | SGGGGGRLRPLPAPGNLNVYQT       |         |
| irx3_Xentro     | FANARRRLKKNKMTWTKARS   | DEELEDDDNDGSGGKELGDS             | SGGGGGRLRPLPAPGNLNVYQT       |         |
| irx3b_BRARER    | FANARRRLKKNKMTWTKARS   | DEELEDDDNDGSGGKELGDS             | SGGGGGRLRPLPAPGNLNVYQT       |         |
| irx-a_Petmar    | FANARRRLKKNKMTWTKARS   | DEELEDDDNDGSGGKELGDS             | SGGGGGRLRPLPAPGNLNVYQT       |         |
| irx-7_BRARER    | FANARRRLKKNKMTWTKARS   | DEELEDDDNDGSGGKELGDS             | SGGGGGRLRPLPAPGNLNVYQT       |         |
| CAG03859_Tetnig | FANARRRLKKNKMTWTKARS   | DEELEDDDNDGSGGKELGDS             | SGGGGGRLRPLPAPGNLNVYQT       |         |
| irx2_Acypis     | FANARRRLKKNKMTWTKARS   | DEELEDDDNDGSGGKELGDS             | SGGGGGRLRPLPAPGNLNVYQT       |         |
| irx2_Pedhumcor  | FANARRRLKKNKMTWTKARS   | DEELEDDDNDGSGGKELGDS             | SGGGGGRLRPLPAPGNLNVYQT       |         |
| caup_Dromel     | FANARRRLKKNKMTWTKARS   | DEELEDDDNDGSGGKELGDS             | SGGGGGRLRPLPAPGNLNVYQT       |         |
| irx_Calvic      | FANARRRLKKNKMTWTKARS   | DEELEDDDNDGSGGKELGDS             | SGGGGGRLRPLPAPGNLNVYQT       |         |
| ara_Dromel      | FANARRRLKKNKMTWTKARS   | DEELEDDDNDGSGGKELGDS             | SGGGGGRLRPLPAPGNLNVYQT       |         |
| irx2_Tricas     | FANARRRLKKNKMTWTKARS   | DEELEDDDNDGSGGKELGDS             | SGGGGGRLRPLPAPGNLNVYQT       |         |
| irx2_Culpipqui  | FANARRRLKKNKMTWTKARS   | DEELEDDDNDGSGGKELGDS             | SGGGGGRLRPLPAPGNLNVYQT       |         |
| irx2_Helera     | FANARRRLKKNKMTWTKARS   | DEELEDDDNDGSGGKELGDS             | SGGGGGRLRPLPAPGNLNVYQT       |         |
| irx_Spofru      | FANARRRLKKNKMTWTKARS   | DEELEDDDNDGSGGKELGDS             | SGGGGGRLRPLPAPGNLNVYQT       |         |
| irx2_Bommor     | FANARRRLKKNKMTWTKARS   | DEELEDDDNDGSGGKELGDS             | SGGGGGRLRPLPAPGNLNVYQT       |         |
| irx2_Anogam     | FANARRRLKKNKMTWTKARS   | DEELEDDDNDGSGGKELGDS             | SGGGGGRLRPLPAPGNLNVYQT       |         |
| irx2_Nasvit     | FANARRRLKKNKMTWTKARS   | DEELEDDDNDGSGGKELGDS             | SGGGGGRLRPLPAPGNLNVYQT       |         |
| irx2_Apimel     | FANARRRLKKNKMTWTKARS   | DEELEDDDNDGSGGKELGDS             | SGGGGGRLRPLPAPGNLNVYQT       |         |
| irx2_Dappul     | FANARRRLKKNKMTWTKARS   | DEELEDDDNDGSGGKELGDS             | SGGGGGRLRPLPAPGNLNVYQT       |         |
| irx3_Capspl     | FANARRRLKKNKMTWTKARS   | DEELEDDDNDGSGGKELGDS             | SGGGGGRLRPLPAPGNLNVYQT       |         |
| irx2_Capspl     | FANARRRLKKNKMTWTKARS   | DEELEDDDNDGSGGKELGDS             | SGGGGGRLRPLPAPGNLNVYQT       |         |
| irx1_Lotgig     | FANARRRLKKNKMTWTKARS   | DEELEDDDNDGSGGKELGDS             | SGGGGGRLRPLPAPGNLNVYQT       |         |
| irx1_Aedaeg     | FANARRRLKKNKMTWTKARS   | DEELEDDDNDGSGGKELGDS             | SGGGGGRLRPLPAPGNLNVYQT       |         |
| irx1_Culpipqui  | FANARRRLKKNKMTWTKARS   | DEELEDDDNDGSGGKELGDS             | SGGGGGRLRPLPAPGNLNVYQT       |         |
| irx1_Anogam     | FANARRRLKKNKMTWTKARS   | DEELEDDDNDGSGGKELGDS             | SGGGGGRLRPLPAPGNLNVYQT       |         |
| irx1_Bommor     | FANARRRLKKNKMTWTKARS   | DEELEDDDNDGSGGKELGDS             | SGGGGGRLRPLPAPGNLNVYQT       |         |
| irx1_Apimel     | FANARRRLKKNKMTWTKARS   | DEELEDDDNDGSGGKELGDS             | SGGGGGRLRPLPAPGNLNVYQT       |         |
| irx1_Nasvit     | FANARRRLKKNKMTWTKARS   | DEELEDDDNDGSGGKELGDS             | SGGGGGRLRPLPAPGNLNVYQT       |         |
| irx1_Helera     | FANARRRLKKNKMTWTKARS   | DEELEDDDNDGSGGKELGDS             | SGGGGGRLRPLPAPGNLNVYQT       |         |
| irx1_Tricas     | FANARRRLKKNKMTWTKARS   | DEELEDDDNDGSGGKELGDS             | SGGGGGRLRPLPAPGNLNVYQT       |         |
| irx1_Acypis     | FANARRRLKKNKMTWTKARS   | DEELEDDDNDGSGGKELGDS             | SGGGGGRLRPLPAPGNLNVYQT       |         |
| irx1_Pedhumcor  | FANARRRLKKNKMTWTKARS   | DEELEDDDNDGSGGKELGDS             | SGGGGGRLRPLPAPGNLNVYQT       |         |
| mirr_Dromel     | FANARRRLKKNKMTWTKARS   | DEELEDDDNDGSGGKELGDS             | SGGGGGRLRPLPAPGNLNVYQT       |         |
| irx1_Dappul     | FANARRRLKKNKMTWTKARS   | DEELEDDDNDGSGGKELGDS             | SGGGGGRLRPLPAPGNLNVYQT       |         |
| irx4_Lotgig     | FANARRRLKKNKMTWTKARS   | DEELEDDDNDGSGGKELGDS             | SGGGGGRLRPLPAPGNLNVYQT       |         |
| irx_Mytcsl      | FANARRRLKKNKMTWTKARS   | DEELEDDDNDGSGGKELGDS             | SGGGGGRLRPLPAPGNLNVYQT       |         |
| irx2_Lotgig     | FANARRRLKKNKMTWTKARS   | DEELEDDDNDGSGGKELGDS             | SGGGGGRLRPLPAPGNLNVYQT       |         |
| irx3_Lotgig     | FANARRRLKKNKMTWTKARS   | DEELEDDDNDGSGGKELGDS             | SGGGGGRLRPLPAPGNLNVYQT       |         |
| irx_Sackov      | FANARRRLKKNKMTWTKARS   | DEELEDDDNDGSGGKELGDS             | SGGGGGRLRPLPAPGNLNVYQT       |         |
| irx_Strpur      | FANARRRLKKNKMTWTKARS   | DEELEDDDNDGSGGKELGDS             | SGGGGGRLRPLPAPGNLNVYQT       |         |
| irx4_Musmus     | FANARRRLKKNKMTWTKARS   | DEELEDDDNDGSGGKELGDS             | SGGGGGRLRPLPAPGNLNVYQT       |         |
| irx4_Homsap     | FANARRRLKKNKMTWTKARS   | DEELEDDDNDGSGGKELGDS             | SGGGGGRLRPLPAPGNLNVYQT       |         |
| irx4_Galgal     | FANARRRLKKNKMTWTKARS   | DEELEDDDNDGSGGKELGDS             | SGGGGGRLRPLPAPGNLNVYQT       |         |
| irx4_Xentro     | FANARRRLKKNKMTWTKARS   | DEELEDDDNDGSGGKELGDS             | SGGGGGRLRPLPAPGNLNVYQT       |         |
| irx4a_BRARER    | FANARRRLKKNKMTWTKARS   | DEELEDDDNDGSGGKELGDS             | SGGGGGRLRPLPAPGNLNVYQT       |         |
| irx4a_Tetnig    | FANARRRLKKNKMTWTKARS   | DEELEDDDNDGSGGKELGDS             | SGGGGGRLRPLPAPGNLNVYQT       |         |
| irx4b_BRARER    | FANARRRLKKNKMTWTKARS   | DEELEDDDNDGSGGKELGDS             | SGGGGGRLRPLPAPGNLNVYQT       |         |
| irx4b_Tetnig    | FANARRRLKKNKMTWTKARS   | DEELEDDDNDGSGGKELGDS             | SGGGGGRLRPLPAPGNLNVYQT       |         |
| irx6_Musmus     | FANARRRLKKNKMTWTKARS   | DEELEDDDNDGSGGKELGDS             | SGGGGGRLRPLPAPGNLNVYQT       |         |
| irx6_Homsap     | FANARRRLKKNKMTWTKARS   | DEELEDDDNDGSGGKELGDS             | SGGGGGRLRPLPAPGNLNVYQT       |         |
| irx6a_BRARER    | FANARRRLKKNKMTWTKARS   | DEELEDDDNDGSGGKELGDS             | SGGGGGRLRPLPAPGNLNVYQT       |         |
| Irx6a_Tetnig    | FANARRRLKKNKMTWTKARS   | DEELEDDDNDGSGGKELGDS             | SGGGGGRLRPLPAPGNLNVYQT       |         |
| irx6_Xentro     | FANARRRLKKNKMTWTKARS   | DEELEDDDNDGSGGKELGDS             | SGGGGGRLRPLPAPGNLNVYQT       |         |
| irxA_Braflo     | FANARRRLKKNKMTWTKARS   | DEELEDDDNDGSGGKELGDS             | SGGGGGRLRPLPAPGNLNVYQT       |         |
| irxB_Braflo     | FANARRRLKKNKMTWTKARS   | DEELEDDDNDGSGGKELGDS             | SGGGGGRLRPLPAPGNLNVYQT       |         |
| irx-d_Petmar    | FANARRRLKKNKMTWTKARS   | DEELEDDDNDGSGGKELGDS             | SGGGGGRLRPLPAPGNLNVYQT       |         |
| irx2_Musmus     | FANARRRLKKNKMTWTKARS   | DEELEDDDNDGSGGKELGDS             | SGGGGGRLRPLPAPGNLNVYQT       |         |
| irx2_Homsap     | FANARRRLKKNKMTWTKARS   | DEELEDDDNDGSGGKELGDS             | SGGGGGRLRPLPAPGNLNVYQT       |         |
| irx2_Galgal     | FANARRRLKKNKMTWTKARS   | DEELEDDDNDGSGGKELGDS             | SGGGGGRLRPLPAPGNLNVYQT       |         |
| irx2_Xentro     | FANARRRLKKNKMTWTKARS   | DEELEDDDNDGSGGKELGDS             | SGGGGGRLRPLPAPGNLNVYQT       |         |
| irx2a_BRARER    | FANARRRLKKNKMTWTKARS   | DEELEDDDNDGSGGKELGDS             | SGGGGGRLRPLPAPGNLNVYQT       |         |
| irx2_Tetnig     | FANARRRLKKNKMTWTKARS   | DEELEDDDNDGSGGKELGDS             | SGGGGGRLRPLPAPGNLNVYQT       |         |
| irx5_Musmus     | FANARRRLKKNKMTWTKARS   | DEELEDDDNDGSGGKELGDS             | SGGGGGRLRPLPAPGNLNVYQT       |         |
| irx5_Homsap     | FANARRRLKKNKMTWTKARS   | DEELEDDDNDGSGGKELGDS             | SGGGGGRLRPLPAPGNLNVYQT       |         |
| irx5_Galgal     | FANARRRLKKNKMTWTKARS   | DEELEDDDNDGSGGKELGDS             | SGGGGGRLRPLPAPGNLNVYQT       |         |
| irx5_Xentro     | FANARRRLKKNKMTWTKARS   | DEELEDDDNDGSGGKELGDS             | SGGGGGRLRPLPAPGNLNVYQT       |         |
| irx5a_BRARER    | FANARRRLKKNKMTWTKARS   | DEELEDDDNDGSGGKELGDS             | SGGGGGRLRPLPAPGNLNVYQT       |         |
| irx5a_Tetnig    | FANARRRLKKNKMTWTKARS   | DEELEDDDNDGSGGKELGDS             | SGGGGGRLRPLPAPGNLNVYQT       |         |
| irx5b_BRARER    | FANARRRLKKNKMTWTKARS   | DEELEDDDNDGSGGKELGDS             | SGGGGGRLRPLPAPGNLNVYQT       |         |
| irx5b_Tetnig    | FANARRRLKKNKMTWTKARS   | DEELEDDDNDGSGGKELGDS             | SGGGGGRLRPLPAPGNLNVYQT       |         |
| irxNemvec       | FANARRRLKKNKMTWTKARS   | DEELEDDDNDGSGGKELGDS             | SGGGGGRLRPLPAPGNLNVYQT       |         |
| irx_Triadh      | FANARRRLKKNKMTWTKARS   | DEELEDDDNDGSGGKELGDS             | SGGGGGRLRPLPAPGNLNVYQT       |         |
| irx4_Schmed     | FANARRRLKKNKMTWTKARS   | DEELEDDDNDGSGGKELGDS             | SGGGGGRLRPLPAPGNLNVYQT       |         |
| irx_Hydmag      | FANARRRLKKNKMTWTKARS   | DEELEDDDNDGSGGKELGDS             | SGGGGGRLRPLPAPGNLNVYQT       |         |
| irxa_Ampque     | FANARRRLKKNKMTWTKARS   | DEELEDDDNDGSGGKELGDS             | SGGGGGRLRPLPAPGNLNVYQT       |         |
| irxe_Ampque     | FANARRRLKKNKMTWTKARS   | DEELEDDDNDGSGGKELGDS             | SGGGGGRLRPLPAPGNLNVYQT       |         |
| irx-a_Subdom    | FANARRRLKKNKMTWTKARS   | DEELEDDDNDGSGGKELGDS             | SGGGGGRLRPLPAPGNLNVYQT       |         |
| irxc_Ampque     | FANARRRLKKNKMTWTKARS   | DEELEDDDNDGSGGKELGDS             | SGGGGGRLRPLPAPGNLNVYQT       |         |
| irxd_Ampque     | FANARRRLKKNKMTWTKARS   | DEELEDDDNDGSGGKELGDS             | SGGGGGRLRPLPAPGNLNVYQT       |         |
| irxb_Ampque     | FANARRRLKKNKMTWTKARS   | DEELEDDDNDGSGGKELGDS             | SGGGGGRLRPLPAPGNLNVYQT       |         |
