# Supplementary material for: Evolutionary history of the iroquois/Irx genes in metazoans
Source: PubMed Central journal article supplement (PMC2674049; doi:10.1186/1471-2148-9-74), 2009-04-15

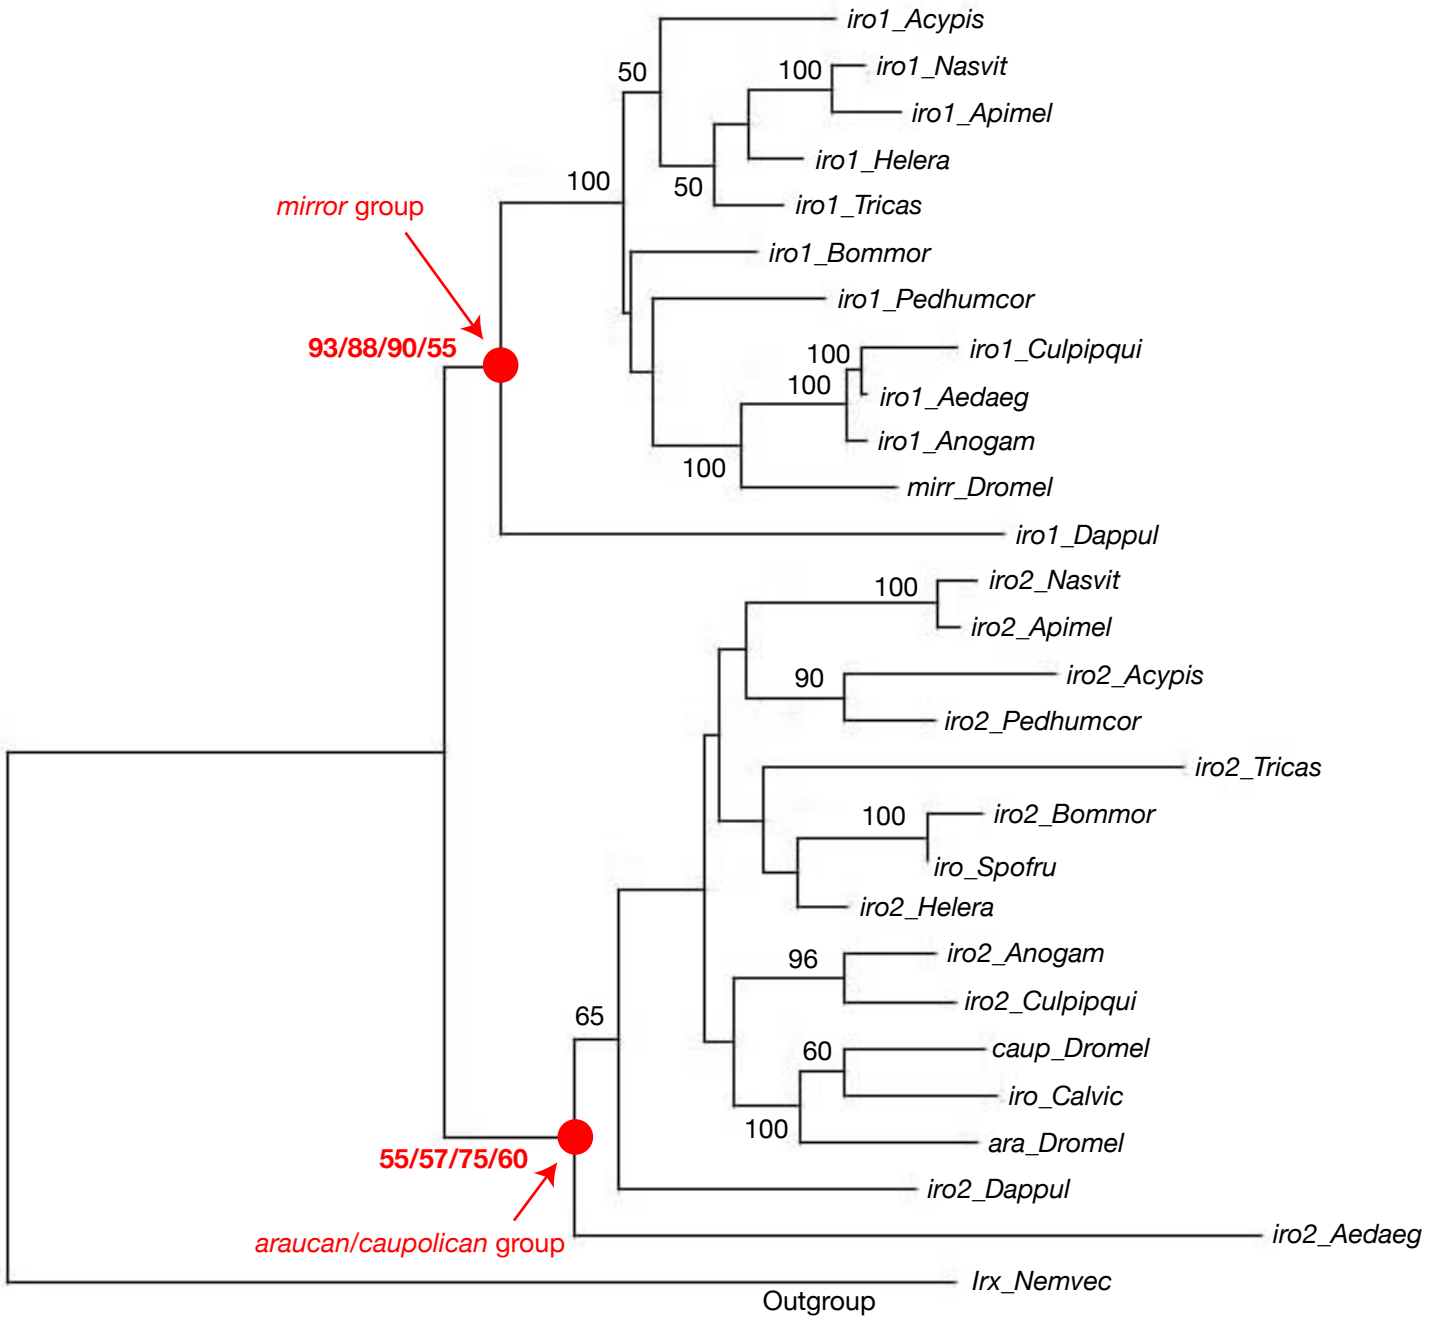

Supplement: 1471-2148-9-74-S3.pdf [file 1471-2148-9-74-S3.pdf]
