# Supplementary material for: Evolutionary history of the iroquois/Irx genes in metazoans
Source: PubMed Central journal article supplement (PMC2674049; doi:10.1186/1471-2148-9-74), 2009-04-15
Supplement: 1471-2148-9-74-S4.pdf [file 1471-2148-9-74-S4.pdf]

|                                                                 |                                                      |                |                |                   |                   |                       |                       |                  |
|-----------------------------------------------------------------|------------------------------------------------------|----------------|----------------|-------------------|-------------------|-----------------------|-----------------------|------------------|
| <i>Drosophila melanogaster</i><br>Chromosome 3L                 | <b>CG4069</b>                                        |                |                |                   |                   |                       |                       | Size = 206144 bp |
|                                                                 | 5' position                                          | 3' position    | Gene size (nt) | CDS Size (nt)     | protein Size (aa) | Orientation           | Total number of exons |                  |
|                                                                 | 12,528,524                                           | 12,530,410     | 1706           | 1530              | 509               | Reverse               | 4                     |                  |
|                                                                 | Gap : 199 bp                                         |                |                |                   |                   |                       |                       |                  |
|                                                                 | <b>CG10632</b>                                       |                |                |                   |                   |                       |                       |                  |
|                                                                 | 5' position                                          | 3' position    | Gene size (nt) | CDS Size (nt)     | protein Size (aa) | Orientation           | Total number of exons |                  |
|                                                                 | 12,530,609                                           | 12,565,622     | 35014          | 1884              | 627               | Reverse               | 8                     |                  |
|                                                                 | Gap : 8152 bp                                        |                |                |                   |                   |                       |                       |                  |
|                                                                 | <b>araucan</b>                                       |                |                |                   |                   |                       |                       |                  |
|                                                                 | 5' position                                          | 3' position    | Gene size (nt) | CDS Size (nt)     | protein Size (aa) | Orientation           | Total number of exons |                  |
|                                                                 | 12,573,774                                           | 12,589,118     | 15345          | 2154              | 717               | Forward               | 5                     |                  |
|                                                                 | Gap : 14108 bp                                       |                |                |                   |                   |                       |                       |                  |
|                                                                 | <b>caupolican</b>                                    |                |                |                   |                   |                       |                       |                  |
|                                                                 | 5' position                                          | 3' position    | Gene size (nt) | CDS Size (nt)     | protein Size (aa) | Orientation           | Total number of exons |                  |
|                                                                 | 12,603,226                                           | 12,614,908     | 11683          | 2082              | 693               | Forward               | 5                     |                  |
|                                                                 | Gap : 6128 bp                                        |                |                |                   |                   |                       |                       |                  |
|                                                                 | <b>CG32111</b>                                       |                |                |                   |                   |                       |                       |                  |
| 5' position                                                     | 3' position                                          | Gene size (nt) | CDS Size (nt)  | protein Size (aa) | Orientation       | Total number of exons |                       |                  |
| 12,621,036                                                      | 12,641,380                                           | 20345          | 513            | 170               | Forward           | 7                     |                       |                  |
| Gap : 45468 bp                                                  |                                                      |                |                |                   |                   |                       |                       |                  |
| <b>mirror</b>                                                   |                                                      |                |                |                   |                   |                       |                       |                  |
| 5' position                                                     | 3' position                                          | Gene size (nt) | CDS Size (nt)  | protein Size (aa) | Orientation       | Total number of exons |                       |                  |
| 12,686,848                                                      | 12,703,243                                           | 16396          | 1926           | 641               | Forward           | 5                     |                       |                  |
| Gap : 24806 bp                                                  |                                                      |                |                |                   |                   |                       |                       |                  |
| <b>CG10975-PTP69D</b>                                           |                                                      |                |                |                   |                   |                       |                       |                  |
| 5' position                                                     | 3' position                                          | Gene size (nt) | CDS Size (nt)  | protein Size (aa) | Orientation       | Total number of exons |                       |                  |
| 12,728,049                                                      | 12,734,668                                           | 6620           | 4389           | 1462              | Forward           | 12                    |                       |                  |
| <i>Anopheles gambiae</i><br>Chromosome 2L                       | <b>CG4069</b>                                        |                |                |                   |                   |                       |                       | Size = 472591 bp |
|                                                                 | 5' position                                          | 3' position    | Gene size (nt) | CDS Size (nt)     | protein Size (aa) | Orientation           | Total number of exons |                  |
|                                                                 | 7,816,277                                            | 7,818,115      | 1838           | 1672              | 533               | Reverse               | 3                     |                  |
|                                                                 | Gap : 2615 bp                                        |                |                |                   |                   |                       |                       |                  |
|                                                                 | <b>CG10632</b>                                       |                |                |                   |                   |                       |                       |                  |
|                                                                 | 5' position                                          | 3' position    | Gene size (nt) | CDS Size (nt)     | protein Size (aa) | Orientation           | Total number of exons |                  |
|                                                                 | 7,820,730                                            | 7,916,840      | 96111          | 1965              | 654               | Reverse               | 10                    |                  |
|                                                                 | Gap : 56641 bp                                       |                |                |                   |                   |                       |                       |                  |
|                                                                 | <b>araucan/caupolican</b>                            |                |                |                   |                   |                       |                       |                  |
|                                                                 | 5' position                                          | 3' position    | Gene size (nt) | CDS Size (nt)     | protein Size (aa) | Orientation           | Total number of exons |                  |
| 7,973,481                                                       | 8,020,949                                            | 47469          | 2349           | 782               | Forward           | 6                     |                       |                  |
| Gap : 57339 bp                                                  |                                                      |                |                |                   |                   |                       |                       |                  |
| <b>mirror</b>                                                   |                                                      |                |                |                   |                   |                       |                       |                  |
| 5' position                                                     | 3' position                                          | Gene size (nt) | CDS Size (nt)  | protein Size (aa) | Orientation       | Total number of exons |                       |                  |
| 8,078,288                                                       | 8,136,322                                            | 58035          | 1728           | 575               | Forward           | 5                     |                       |                  |
| Gap : 150350 bp                                                 |                                                      |                |                |                   |                   |                       |                       |                  |
| <b>CG5288</b>                                                   |                                                      |                |                |                   |                   |                       |                       |                  |
| 5' position                                                     | 3' position                                          | Gene size (nt) | CDS Size (nt)  | protein Size (aa) | Orientation       | Total number of exons |                       |                  |
| 8,286,672                                                       | 8,288,868                                            | 2197           | 1769           | 477               | Forward           | 7                     |                       |                  |
| <i>Nasonia vitripennis</i><br>Chromosome Unknown<br>Scaffold 12 | <b>similar to Juvenile hormone-inducible protein</b> |                |                |                   |                   |                       |                       | Size = 422674 bp |
|                                                                 | 5' position                                          | 3' position    | Gene size (nt) | CDS Size (nt)     | protein Size (aa) | Orientation           | Total number of exons |                  |
|                                                                 | 2,251,036                                            | 2,301,061      | 50026          | 1197              | 398               | Reverse               | 3                     |                  |
|                                                                 | Gap : 114367 bp                                      |                |                |                   |                   |                       |                       |                  |
|                                                                 | <b>mirror</b>                                        |                |                |                   |                   |                       |                       |                  |
|                                                                 | 5' position                                          | 3' position    | Gene size (nt) | CDS Size (nt)     | protein Size (aa) | Orientation           | Total number of exons |                  |
|                                                                 | 2,415,428                                            | 2,442,094      | 26666          | 1953              | 650               | Reverse               | 5                     |                  |
|                                                                 | Gap : 54098 bp                                       |                |                |                   |                   |                       |                       |                  |
|                                                                 | <b>araucan/caupolican</b>                            |                |                |                   |                   |                       |                       |                  |
|                                                                 | 5' position                                          | 3' position    | Gene size (nt) | CDS Size (nt)     | protein Size (aa) | Orientation           | Total number of exons |                  |
| 2,496,192                                                       | 2,552,257                                            | 56066          | 2112           | 703               | Reverse           | 7                     |                       |                  |
| Gap : 8427 bp                                                   |                                                      |                |                |                   |                   |                       |                       |                  |
| <b>CG10632</b>                                                  |                                                      |                |                |                   |                   |                       |                       |                  |
| 5' position                                                     | 3' position                                          | Gene size (nt) | CDS Size (nt)  | protein Size (aa) | Orientation       | Total number of exons |                       |                  |
| 2,560,684                                                       | 2,669,901                                            | 109218         | 1782           | 594               | Forward           | 11                    |                       |                  |
| Gap : 2766 bp                                                   |                                                      |                |                |                   |                   |                       |                       |                  |
| <b>similar to mCG64768</b>                                      |                                                      |                |                |                   |                   |                       |                       |                  |
| 5' position                                                     | 3' position                                          | Gene size (nt) | CDS Size (nt)  | protein Size (aa) | Orientation       | Total number of exons |                       |                  |
| 2,672,667                                                       | 2,673,710                                            | 1044           | 1044           | 347               | Forward           | 1                     |                       |                  |
| <i>Tribolium castaneum</i>                                      | <b>CG31638</b>                                       |                |                |                   |                   |                       |                       |                  |

Linkage Group 3  
Scaffold 12

| 5' position               | 3' position | Gene size (nt) | CDS Size (nt) | protein Size (aa) | Orientation | Total number of exons |
|---------------------------|-------------|----------------|---------------|-------------------|-------------|-----------------------|
| 1,629,351                 | 1,636,576   | 7226           | 1557          | 518               | Forward     | 6                     |
| <i>Gap : 1051 bp</i>      |             |                |               |                   |             |                       |
| <b>CG10632</b>            |             |                |               |                   |             |                       |
| 5' position               | 3' position | Gene size (nt) | CDS Size (nt) | protein Size (aa) | Orientation | Total number of exons |
| 1,637,627                 | 1,718,132   | 80506          | 1395          | 464               | Reverse     | 9                     |
| <i>Gap : 322 bp</i>       |             |                |               |                   |             |                       |
| <b>araucan/caupolican</b> |             |                |               |                   |             |                       |
| 5' position               | 3' position | Gene size (nt) | CDS Size (nt) | protein Size (aa) | Orientation | Total number of exons |
| 1,718,454                 | 1,845,814   | 127361         | 1939          | 710               | Forward     | 9                     |
| <i>Gap : 135 bp</i>       |             |                |               |                   |             |                       |
| <b>mirror</b>             |             |                |               |                   |             |                       |
| 5' position               | 3' position | Gene size (nt) | CDS Size (nt) | protein Size (aa) | Orientation | Total number of exons |
| 1,845,949                 | 1,879,353   | 33405          | 1377          | 458               | Forward     | 5                     |
| <i>Gap : 176682 bp</i>    |             |                |               |                   |             |                       |
| <b>CG5288</b>             |             |                |               |                   |             |                       |
| 5' position               | 3' position | Gene size (nt) | CDS Size (nt) | protein Size (aa) | Orientation | Total number of exons |
| 2,056,035                 | 2,072,204   | 16170          | 1044          | 459               | Forward     | 7                     |

Size = 442853 bp

*Daphnia pulex*  
Scaffold 33

| <b>GNO_270333</b>         |             |                |               |                   |             |                       |
|---------------------------|-------------|----------------|---------------|-------------------|-------------|-----------------------|
| 5' position               | 3' position | Gene size (nt) | CDS Size (nt) | protein Size (aa) | Orientation | Total number of exons |
| 769,040                   | 770,090     | 1855           | 1046          | 288               | Reverse     | 4                     |
| <i>Gap : 55246 bp</i>     |             |                |               |                   |             |                       |
| <b>mirror</b>             |             |                |               |                   |             |                       |
| 5' position               | 3' position | Gene size (nt) | CDS Size (nt) | protein Size (aa) | Orientation | Total number of exons |
| 825,336                   | 836,158     | 8150           | 2775          | 925               | Reverse     | 5                     |
| <i>Gap : 25759 bp</i>     |             |                |               |                   |             |                       |
| <b>araucan/caupolican</b> |             |                |               |                   |             |                       |
| 5' position               | 3' position | Gene size (nt) | CDS Size (nt) | protein Size (aa) | Orientation | Total number of exons |
| 861,917                   | 871,863     | 9946           | 1939          | 784               | Reverse     | 9                     |
| <i>Gap : 4856 bp</i>      |             |                |               |                   |             |                       |
| <b>CG10632</b>            |             |                |               |                   |             |                       |
| 5' position               | 3' position | Gene size (nt) | CDS Size (nt) | protein Size (aa) | Orientation | Total number of exons |
| 876,719                   | 893,462     | 16744          | 1713          | 570               | Forward     | 11                    |
| <i>Gap : 489 bp</i>       |             |                |               |                   |             |                       |
| <b>Pumpless</b>           |             |                |               |                   |             |                       |
| 5' position               | 3' position | Gene size (nt) | CDS Size (nt) | protein Size (aa) | Orientation | Total number of exons |
| 893,951                   | 894,387     | 437            | 366           | 123               | Reverse     | 2                     |

Size = 125347 bp

*Pediculus humanus corporis*  
Supercontig 1103172108298

| <b>Dynein, axonemal, heavy chain 5 [CG9492]</b> |             |                |               |                   |             |                       |
|-------------------------------------------------|-------------|----------------|---------------|-------------------|-------------|-----------------------|
| 5' position                                     | 3' position | Gene size (nt) | CDS Size (nt) | protein Size (aa) | Orientation | Total number of exons |
| 166,574                                         | 184,606     | 18032          | 10980         | 3660              | Reverse     | 39                    |
| <i>Gap : 5376 bp</i>                            |             |                |               |                   |             |                       |
| <b>CG10632</b>                                  |             |                |               |                   |             |                       |
| 5' position                                     | 3' position | Gene size (nt) | CDS Size (nt) | protein Size (aa) | Orientation | Total number of exons |
| 189,982                                         | 233,138     | 43210          | 1713          | 500               | Reverse     | 8                     |
| <i>Gap : 4207 bp</i>                            |             |                |               |                   |             |                       |
| <b>araucan/caupolican</b>                       |             |                |               |                   |             |                       |
| 5' position                                     | 3' position | Gene size (nt) | CDS Size (nt) | protein Size (aa) | Orientation | Total number of exons |
| 237,345                                         | 286,802     | 49458          |               |                   | Forward     |                       |
| <i>Gap : 51009 bp</i>                           |             |                |               |                   |             |                       |
| <b>mirror</b>                                   |             |                |               |                   |             |                       |
| 5' position                                     | 3' position | Gene size (nt) | CDS Size (nt) | protein Size (aa) | Orientation | Total number of exons |
| 337,811                                         | 355,532     | 17721          | 1575          | 525               | Forward     | 5                     |
| <i>Gap : 79073 bp</i>                           |             |                |               |                   |             |                       |
| <b>Thioredoxin like protein</b>                 |             |                |               |                   |             |                       |
| 5' position                                     | 3' position | Gene size (nt) | CDS Size (nt) | protein Size (aa) | Orientation | Total number of exons |
| 434,605                                         | 434,976     | 372            | 372           | 124               | Forward     | 1                     |

Size = 268402 bp

*Caenorhabditis elegans*  
Chromosome I

| <b>C41G7.7</b>           |             |                |               |                   |             |                       |
|--------------------------|-------------|----------------|---------------|-------------------|-------------|-----------------------|
| 5' position              | 3' position | Gene size (nt) | CDS Size (nt) | protein Size (aa) | Orientation | Total number of exons |
| 9,533,571                | 9,536,262   | 2692           | 471           | 156               | Reverse     | 6                     |
| <i>Gap : 194 bp</i>      |             |                |               |                   |             |                       |
| <b>lrx (C36F7.1)</b>     |             |                |               |                   |             |                       |
| 5' position              | 3' position | Gene size (nt) | CDS Size (nt) | protein Size (aa) | Orientation | Total number of exons |
| 9,536,456                | 9,540,959   | 4504           | 1134          | 377               | Reverse     | 5                     |
| <i>Gap : 3780 bp</i>     |             |                |               |                   |             |                       |
| <b>CG10632 (C36F7.2)</b> |             |                |               |                   |             |                       |
| 5' position              | 3' position | Gene size (nt) | CDS Size (nt) | protein Size (aa) | Orientation | Total number of exons |
| 9,544,739                | 9,558,087   | 13349          | 897           | 298               | Forward     | 8                     |

Size = 40797 bp

|                                      |             |                |               |                   |             |                       |
|--------------------------------------|-------------|----------------|---------------|-------------------|-------------|-----------------------|
| Gap : 7298 bp                        |             |                |               |                   |             |                       |
| <b>similar to CG32791 (C36F7.4b)</b> |             |                |               |                   |             |                       |
| 5' position                          | 3' position | Gene size (nt) | CDS Size (nt) | protein Size (aa) | Orientation | Total number of exons |
| 9,565,385                            | 9,574,368   | 8983           | 843           | 280               | Reverse     | 10                    |

*Trichoplax adhaerens*  
Scaffold 4

|                                                |             |                |               |                   |             |                       |
|------------------------------------------------|-------------|----------------|---------------|-------------------|-------------|-----------------------|
| <b>Myosin3 MHCA</b>                            |             |                |               |                   |             |                       |
| 5' position                                    | 3' position | Gene size (nt) | CDS Size (nt) | protein Size (aa) | Orientation | Total number of exons |
| 5,176,906                                      | 5,187,217   | 10312          | 4344          | 1448              | Forward     |                       |
| Gap : 7933 bp                                  |             |                |               |                   |             |                       |
| <b>Carbonic anhydrase related protein VIII</b> |             |                |               |                   |             |                       |
| 5' position                                    | 3' position | Gene size (nt) | CDS Size (nt) | protein Size (aa) | Orientation | Total number of exons |
| 5,195,150                                      | 5,198,703   | 3553           |               |                   | Forward     |                       |
| Gap : 28043 bp                                 |             |                |               |                   |             |                       |
| <b>Irx</b>                                     |             |                |               |                   |             |                       |
| 5' position                                    | 3' position | Gene size (nt) | CDS Size (nt) | protein Size (aa) | Orientation | Total number of exons |
| 5,226,746                                      | 5,228,948   | 2202           |               |                   | Forward     |                       |
| Gap : 2934 bp                                  |             |                |               |                   |             |                       |
| <b>Peroxisomal LON</b>                         |             |                |               |                   |             |                       |
| 5' position                                    | 3' position | Gene size (nt) | CDS Size (nt) | protein Size (aa) | Orientation | Total number of exons |
| 5,231,882                                      | 5,246,517   | 14635          |               |                   | Forward     |                       |

Size = 69611 bp

*Capitella spl*  
Scaffold 402

|                                                |             |                |               |                   |             |                       |
|------------------------------------------------|-------------|----------------|---------------|-------------------|-------------|-----------------------|
| <b>phosphorylated CTD interacting factor 1</b> |             |                |               |                   |             |                       |
| 5' position                                    | 3' position | Gene size (nt) | CDS Size (nt) | protein Size (aa) | Orientation | Total number of exons |
| 81,537                                         | 84,783      | 3247           | 1587          | 1950              | Reverse     | 10                    |
| Gap : 9009bp                                   |             |                |               |                   |             |                       |
| <b>Irx-3</b>                                   |             |                |               |                   |             |                       |
| 5' position                                    | 3' position | Gene size (nt) | CDS Size (nt) | protein Size (aa) | Orientation | Total number of exons |
| 94,772                                         | 102,257     | 7491           | 1434          | 477               | Reverse     | 6                     |
| Gap : 6096 bp                                  |             |                |               |                   |             |                       |
| <b>CG10632</b>                                 |             |                |               |                   |             |                       |
| 5' position                                    | 3' position | Gene size (nt) | CDS Size (nt) | protein Size (aa) | Orientation | Total number of exons |
| 108,353                                        | 145,607     | 37255          | 1587          | 527               | Forward     | 11                    |
| Gap : 9020 bp                                  |             |                |               |                   |             |                       |
| <b>Irx-1</b>                                   |             |                |               |                   |             |                       |
| 5' position                                    | 3' position | Gene size (nt) | CDS Size (nt) | protein Size (aa) | Orientation | Total number of exons |
| 154627                                         | 159328      | 4701           |               |                   | Reverse     |                       |
| Gap : 9425 bp                                  |             |                |               |                   |             |                       |
| <b>Irx-2</b>                                   |             |                |               |                   |             |                       |
| 5' position                                    | 3' position | Gene size (nt) | CDS Size (nt) | protein Size (aa) | Orientation | Total number of exons |
| 168,753                                        | 172,225     | 3472           | 1080          | 360               | Forward     | 5                     |
| Gap : 4897 bp                                  |             |                |               |                   |             |                       |
| <b>coiled-coil domain containing 90A</b>       |             |                |               |                   |             |                       |
| 5' position                                    | 3' position | Gene size (nt) | CDS Size (nt) | protein Size (aa) | Orientation | Total number of exons |
| 177,122                                        | 180,520     | 3398           | 780           | 260               | Reverse     | 7                     |

Size = 98983 bp

*Lottia gigantea*

|                |             |             |                |               |                   |             |                       |
|----------------|-------------|-------------|----------------|---------------|-------------------|-------------|-----------------------|
| <b>CG10632</b> |             |             |                |               |                   |             |                       |
| Scaffold 838   | 5' position | 3' position | Gene size (nt) | CDS Size (nt) | protein Size (aa) | Orientation | Total number of exons |
|                | 1,547       | 11,895      | 10348          | 1425          | 474               | Forward     | 12                    |

*Lottia gigantea*  
Scaffold 9

|                           |             |                |               |                   |             |                       |
|---------------------------|-------------|----------------|---------------|-------------------|-------------|-----------------------|
| <b>Fantom</b>             |             |                |               |                   |             |                       |
| 5' position               | 3' position | Gene size (nt) | CDS Size (nt) | protein Size (aa) | Orientation | Total number of exons |
| 1,194,379                 | 1,212,782   | 18404          | 4032          | 1344              | Reverse     | 35                    |
| Gap : 29570 bp            |             |                |               |                   |             |                       |
| <b>Irx-4</b>              |             |                |               |                   |             |                       |
| 5' position               | 3' position | Gene size (nt) | CDS Size (nt) | protein Size (aa) | Orientation | Total number of exons |
| 1,242,352                 | 1,247,808   | 5457           | 1299          | 433               | Forward     | 5                     |
| Gap : 47575 bp            |             |                |               |                   |             |                       |
| <b>Irx-2</b>              |             |                |               |                   |             |                       |
| 5' position               | 3' position | Gene size (nt) | CDS Size (nt) | protein Size (aa) | Orientation | Total number of exons |
| 1,295,383                 | 1,303,744   | 8362           | 1293          | 430               | Forward     | 6                     |
| Gap : 34139 bp            |             |                |               |                   |             |                       |
| <b>Irx-1</b>              |             |                |               |                   |             |                       |
| 5' position               | 3' position | Gene size (nt) | CDS Size (nt) | protein Size (aa) | Orientation | Total number of exons |
| 1,337,883                 | 1,349,426   | 11544          | 1386          | 461               | Reverse     | 5                     |
| Gap : 304880 bp           |             |                |               |                   |             |                       |
| <b>Irx-3</b>              |             |                |               |                   |             |                       |
| 5' position               | 3' position | Gene size (nt) | CDS Size (nt) | protein Size (aa) | Orientation | Total number of exons |
| 1,654,306                 | 1,669,438   | 15133          | 1458          | 485               | Reverse     | 6                     |
| Gap : 99740bp             |             |                |               |                   |             |                       |
| <b>Serotonin Receptor</b> |             |                |               |                   |             |                       |

Size = 578630 bp

| 5' position | 3' position | Gene size (nt) | CDS Size (nt) | protein Size (aa) | Orientation | Total number of exons |
|-------------|-------------|----------------|---------------|-------------------|-------------|-----------------------|
| 1,769,178   | 1,773,009   | 3832           | 933           | 311               | Forward     | 2                     |

*Branchiostoma floridae*  
Scaffold 90 ou 632

| <b>Myosin3 MHCA</b>                            |             |                |               |                   |             |                       |
|------------------------------------------------|-------------|----------------|---------------|-------------------|-------------|-----------------------|
| 5' position                                    | 3' position | Gene size (nt) | CDS Size (nt) | protein Size (aa) | Orientation | Total number of exons |
| 1,661,617                                      | 1,679,697   | 18081          | 3669          | 1223              | Reverse     |                       |
| Gap : 19281 bp                                 |             |                |               |                   |             |                       |
| <b>CG10632</b>                                 |             |                |               |                   |             |                       |
| 5' position                                    | 3' position | Gene size (nt) | CDS Size (nt) | protein Size (aa) | Orientation | Total number of exons |
| 1,698,978                                      | 1,753,608   | 54630          | 1509          | 502               | Reverse     | 11                    |
| Gap : 14900 bp                                 |             |                |               |                   |             |                       |
| <b>Irx-C</b>                                   |             |                |               |                   |             |                       |
| 5' position                                    | 3' position | Gene size (nt) | CDS Size (nt) | protein Size (aa) | Orientation | Total number of exons |
| 1,768,508                                      | 1,772,293   | 3786           | 1461          | 486               | Forward     | 7                     |
| Gap : 79295 bp                                 |             |                |               |                   |             |                       |
| <b>Irx-A</b>                                   |             |                |               |                   |             |                       |
| 5' position                                    | 3' position | Gene size (nt) | CDS Size (nt) | protein Size (aa) | Orientation | Total number of exons |
| 1,851,588                                      | 1,854,615   | 3028           | 1488          | 495               | Forward     | 7                     |
| Gap : 36719 bp                                 |             |                |               |                   |             |                       |
| <b>Irx-B</b>                                   |             |                |               |                   |             |                       |
| 5' position                                    | 3' position | Gene size (nt) | CDS Size (nt) | protein Size (aa) | Orientation | Total number of exons |
| 1,891,334                                      | 1,895,774   | 4441           | 1485          | 494               | Reverse     | 7                     |
| Gap : 32745 bp                                 |             |                |               |                   |             |                       |
| <b>Carbonic anhydrase related protein VIII</b> |             |                |               |                   |             |                       |
| 5' position                                    | 3' position | Gene size (nt) | CDS Size (nt) | protein Size (aa) | Orientation | Total number of exons |
| 1,928,519                                      | 1,935,833   | 7314           | 846           | 282               | Reverse     | 7                     |

Size = 274216 bp

*Homo Sapiens*  
cluster IrxB  
Chromosome 16

| <b>FTO</b>                             |             |                |               |                   |             |                       |
|----------------------------------------|-------------|----------------|---------------|-------------------|-------------|-----------------------|
| 5' position                            | 3' position | Gene size (nt) | CDS Size (nt) | protein Size (aa) | Orientation | Total number of exons |
| 52,295,376                             | 52,705,882  | 410507         | 1518          | 505               | Forward     | 9                     |
| Gap : 168831 bp                        |             |                |               |                   |             |                       |
| <b>Irx-3</b>                           |             |                |               |                   |             |                       |
| 5' position                            | 3' position | Gene size (nt) | CDS Size (nt) | protein Size (aa) | Orientation | Total number of exons |
| 52,874,713                             | 52,877,879  | 3167           | 1506          | 501               | Reverse     | 4                     |
| Gap : 644733 bp                        |             |                |               |                   |             |                       |
| <b>Irx-5</b>                           |             |                |               |                   |             |                       |
| 5' position                            | 3' position | Gene size (nt) | CDS Size (nt) | protein Size (aa) | Orientation | Total number of exons |
| 53,522,612                             | 53,525,898  | 3287           | 1452          | 483               | Forward     | 3                     |
| Gap : 390074 bp                        |             |                |               |                   |             |                       |
| <b>Irx-6</b>                           |             |                |               |                   |             |                       |
| 5' position                            | 3' position | Gene size (nt) | CDS Size (nt) | protein Size (aa) | Orientation | Total number of exons |
| 53,915,972                             | 53,922,173  | 6202           | 1341          | 446               | Forward     | 6                     |
| Gap : 148416 bp                        |             |                |               |                   |             |                       |
| <b>MMP2 matrix metalloproteinase 2</b> |             |                |               |                   |             |                       |
| 5' position                            | 3' position | Gene size (nt) | CDS Size (nt) | protein Size (aa) | Orientation | Total number of exons |
| 54,070,589                             | 54,098,104  | 27516          | 1983          | 660               | Forward     | 12                    |

Size = 1,802,728 bp

*Homo Sapiens*  
cluster IrxA  
Chromosome 5

| <b>NDUFS6 NADH dehydrogenase</b>                                            |             |                |               |                   |             |                       |
|-----------------------------------------------------------------------------|-------------|----------------|---------------|-------------------|-------------|-----------------------|
| 5' position                                                                 | 3' position | Gene size (nt) | CDS Size (nt) | protein Size (aa) | Orientation | Total number of exons |
| 1,854,509                                                                   | 1,869,165   | 14657          | 375           | 124               | Forward     | 4                     |
| Gap : 61384bp                                                               |             |                |               |                   |             |                       |
| <b>Irx-4</b>                                                                |             |                |               |                   |             |                       |
| 5' position                                                                 | 3' position | Gene size (nt) | CDS Size (nt) | protein Size (aa) | Orientation | Total number of exons |
| 1,930,549                                                                   | 1,935,880   | 5332           | 1560          | 519               | Reverse     | 5                     |
| Gap : 864000bp                                                              |             |                |               |                   |             |                       |
| <b>Irx-2</b>                                                                |             |                |               |                   |             |                       |
| 5' position                                                                 | 3' position | Gene size (nt) | CDS Size (nt) | protein Size (aa) | Orientation | Total number of exons |
| 2,799,880                                                                   | 2,804,769   | 4890           | 1416          | 471               | Reverse     | 4                     |
| Gap : 844399bp                                                              |             |                |               |                   |             |                       |
| <b>Irx-1</b>                                                                |             |                |               |                   |             |                       |
| 5' position                                                                 | 3' position | Gene size (nt) | CDS Size (nt) | protein Size (aa) | Orientation | Total number of exons |
| 3,649,168                                                                   | 3,654,517   | 5350           | 1443          | 480               | Forward     | 4                     |
| Gap : 644733 bp                                                             |             |                |               |                   |             |                       |
| <b>ADAMTS16 ADAM metalloproteinase with thrombospondin type 1 motif, 16</b> |             |                |               |                   |             |                       |
| 5' position                                                                 | 3' position | Gene size (nt) | CDS Size (nt) | protein Size (aa) | Orientation | Total number of exons |
| 5,193,443                                                                   | 5,373,412   | 179970         | 1443          | 480               | Forward     | 4                     |

Size = 3,518,903 bp
