# Supplementary material for: Evolutionary history of the iroquois/Irx genes in metazoans
Source: PubMed Central journal article supplement (PMC2674049; doi:10.1186/1471-2148-9-74), 2009-04-15
Supplement: 1471-2148-9-74-S5.pdf [file 1471-2148-9-74-S5.pdf]

Nemvec-CG10632 -MSANEPLTLALVREFILKNGSRVNRHDLITHFRTQLNDPVRNGKVRADFKEYVHOLTTVOTID -GEKYFVLKKPKKAPAVLRKPPTRPHTTHHK ---  
Dappul-CG10632 -MAAPTEFTLESVRAFMLERGGKVTNHHLVVKHFKQFLDTPYTK -VARVQPKYVNTLALRQEE -SDKFLVLKPIFYPTXYLATDRVRDVP SYHSVVG  
Tricas-CG10632 --MASSDLTLEOINYNFKENGVVKNRELVHHFKHYLTDPAKEDARVFKKVFNTLAOTKTEG -DEKFLILKTRVONSLDYPPRSOLALSPHS DPR -  
Dromel-CG10632 -MELPKELSAEIRNYMLANECKVTNHALVVKHFKFLTHPQSONEARRFRKTYVTLSTIKNEN -NOKFLILRKKYVNECPTDEVVERAVAAAS ---  
Drops-CG10632 -MELPKELSAEIRNYMLANECKVTNHALVVKHFKFLTHPQSONEARRFRKTYVTLSTIKNEN -NOKFLILRKKYVNECPTDEVVERAVAAAN ---  
Pedhum-CG10632 -MSSAELSFDAVKDFIILNGGKVRNHDLVKHFKFLTKPQNR -DARNYFKEIVNEVAVIRTEG -DEKYLILKRRFRPPGLEECFSSSPSSLSLS ---  
Nasvit-CG10632 -MASPSELSELEIRKYLNDGGSARNQDVLKHFKFLTDESRVBEARNRPEYVINTLATIKTEE -GEKYFVLKPKFRQONLDLSSPTLSFGSPT ---  
Apimel-CG10632 -MATPSELSELEIRKYLNDGGSARNQDVLKHFKFLTDESRVBEARNRPEYVINTLATIKTEE -GEKYFVLKPKFRQONLDLSSPTLSFGSPT ---  
Braflo-CG10632 ~MADYEFSDGKQFIADRGGRVNRVNLVTHFRQHLNDPARKAEARELFKDFVNNVAVIROEE -GEKFLVLKPKYRPSAQVSRVRPLAVEELEYTC  
CaspI-CG10632 --MGDSLFDIVDFMIKGGKVRNHDLVSHKSFSLNDPHOKVANROKFKTFVNTLSSVKLDE -GKFLVLKPKFRNDAPNDATSVPARPSPO ---  
Lotgig-CG10632 --MAATCFLEAVKFEFMINNGGRVNRNQLVTHFKAFNLNDPVSKVTHREKFKDYVNTLATIKLEE -GSKILVLKPKHR -OTENAVPARPTSK ---  
Strpur-CG10632 MADAEFEFSADAVOKFLVSNGGKATNVEVVGHSKYLNDEPFKVLNRQKFKDYINEVATVSKSEK -GEKFLVLKPKYRPSAQVSRVRPLAVEELEYTC

Nemvec-CG10632 ~~~~~~PRPVSA~~~~~MPVARHAKMFEEMAAARVPMTR~~~~~  
Dappul-CG10632 LPLLPSPQOYVPPPAHVQHOHYGQPPMDVAPAFRAPPYRPP -PPEPAPFRSSLSGSDLSHSPVNVYPPQVLPYNN  
Tricas-CG10632 -LALGIPSPDYSYPAKS -PAHROPPYR -PPPPVTSPT -SLDNVLSLSS  
Dromel-CG10632 -GIPEPSSPGGASLNF -SPMROPPYK -PPPMVTSPPA -VSIAKEHOENYOECV  
Drops-CG10632 -NGPEPSSPGGSIITFEGG -SLASPMROPPYK -PPPMVTSPPAGVAVHKVQODNYRECV  
Pedhum-CG10632 -SNSKMPSENTIGNN -LSVROPPYR -PPPPVTPKSPQSSSPLTVSP  
Nasvit-CG10632 -SPISTPNLSTPTS -PLREPPYR -PPPVPAPLSPISNTSSPVRRYTOPPPVGLPLSLPVEPPVGLPIGIPQKPII  
Apimel-CG10632 -SPINTPDI STPLS -PLRVPPYR -PPPPAPLSPPTNNTNREESCSN -FDRE  
Braflo-CG10632 ~~~~~~EEPONRYPY~~~~~PPEOPSSYLAFQEPPLPPPPALASVRRDWDVPAPPAE -EVGGS  
CaspI-CG10632 -LHRPKKOKMLDSF -PLRAPSPEED -KSAASPEOQPOEPOEOTDPVPR  
Lotgig-CG10632 -VDRAOSE -PPGQPAKKNESGGLSK  
Strpur-CG10632 -OAPKPSWPPP -APEQPM -TEPVAPARRKKKSRDHSSAHON

Nemvec-CG10632 ~~~~~~SHSEDHAMNELPDKE~~~~~NRPRELKALSDMVKSGSIDSMDSVSTHSTPKMGRKISOB  
Dappul-CG10632 -YQPPPPPAIPPLPSOKLPAPPPPAVHHFVROTSLPSDDFIPASAYLLPQQQMPERSVSIQDFSSHHVQDLTSGGSPGPVPPRRLKAOR  
Tricas-CG10632 -IMSLODVTPOAPRRK -ORSFDE -DSTPROINNOE  
Dromel-CG10632 -DEFTAAKRIEAPARLERRT -SVKSE -LDOEKPEKTS -RSNSIDVIDNKENIPRFSSSEASSASSTSEKPEM  
Drops-CG10632 -DEFTAAIORIDPARLEROP -ATKTEEDAATSQEPSSVSGSVRSNSVDETGKKNIPRFSSSCASTDSS  
Pedhum-CG10632 -TSIFPTSAISPSPP -KTNVED -PPSVVRRKSLTEKIKKEHSD -MSKSSSDSSTGD  
Nasvit-CG10632 -GLPIGVVYNEPVEFDNVSTASRLPKRE -MATSSPV -ASPPVPPRRKSO -DKIKLANKENOSTDEOTPKKGRSGSESIKE  
Apimel-CG10632 -EAAINARKNGVESVE -AGFSTP -SPPVPPRRKSO -DKVKMENKEN -VDRNRGGSEAVIK  
Nasvit-CG10632 ~~~~~~PAGOPPYPDILVRRPSPFNQYQPPYDEPEOIRROLFSFNQPPNYEHNDLPPVNRQSSFKPEPVSVAARKPSFEKAITHNQFPPH  
CaspI-CG10632 -POETPLNESLEIAAE -EGODEVLSGSPLLAEINOMAEVLRADDPREDTSSRENSPKERNEGSSFVATP  
Lotgig-CG10632 -VHSDEQFDRNKERNFD -TGAN -SLAESTSSVASSLSTGTVSADDDVNDVSVISVKDRAKHLNKIDSE  
Strpur-CG10632 -ESSNGRSSSPKPKGG -TSRPTISAPYITGPVQHSVNN -TRAGERKMEELS

Nemvec-CG10632 ~~~~~~GKROGDSLERNISOALS EDVFEDPIDGDGLMNIPT~~~~~IQ  
Dappul-CG10632 -SDKFNHLVSIFFDEEIKISVKERTORFNKMAEIDLVPKNGSERR -DSKSKE  
Tricas-CG10632 -EEKOTPVSVKERLEKFNRMASMEDE -LSPROAKS -AEK -KKEKOL  
Dromel-CG10632 -ADPTAPAAVGDVAENPISVKEATRKFNRMAS EEEAKIISPPAKKK -PEKOLIEEKDSPEVTL  
Drops-CG10632 -AAEKVSSNEADTAENPISVKEATRKFNRMAS EEEAKIISPPAKKK -PEKOLIEEKDSPEVTL  
Pedhum-CG10632 -VELECEK -KISVKERMOKFNRMASESDLKIPSTTTTTTNNVKKKLDKEDDSSSMTS  
Nasvit-CG10632 -DDOATPNSNLTPAEOLSVRERMORFNRMASEFDLARPNASIPS -VKKRTDKOL  
Apimel-CG10632 -EDEAVATNPGST -EOLSFREMRORFNRMASEFDLGRPNGTITP -TKKRSDDK  
Braflo-CG10632 -EPSPSPLDDAHSPTFKRPSPPAOSONGGPRSELPRSDSSSRMETGSSRSRTVISRSDTASIEKGEAEDDGYGSNVSSVAKRVHFAEYDEYLLHODF  
CaspI-CG10632 -EEEEVPGASGGSAREEDPLAGVEEAPPSPSAPNELSSPPPDAVIEVVTPOK  
Lotgig-CG10632 -SDILLPNOFKKSGRER -SGEDDD -DTHFIS  
Strpur-CG10632 -QIEGVRDARDKFEQESRLOTPTPKSSSSPS

Nemvec-CG10632 ~~~~~~LDAIEKEWLLTTARGNRAHIMCLLEQEP LLAKRDKFTSGY TALHWAAKHGRDDVAMVAKAGAD -VNSKTHGGYTPLHLA  
Dappul-CG10632 ~~~~~~MEPRAKEWMLTARGDYHAIARLLRDEPRLARRV -TGLHWAAKHGNDLLKLLAGTKY -SDVMNARTGCTPLHLA  
Tricas-CG10632 ~~~~~~EPKCMWEYVTAASKGDIQELLKLAOEPRLVNRKV -TVLHWGAKHGNDKIIOMFAGKYK -VDVNGKTYTPLHLA  
Dromel-CG10632 ~~~~~~AHPKAKEWIVSMAKANYOELAKMASEYPELVK -LO -TALHWAAKHGNDVVKLIAGTYK -ADVARTGTYTPLHLA  
Drops-CG10632 ~~~~~~AHPKAKEWIVSMAKANYOELAKMASEYPELVK -LO -TALHWAAKHGNDVVKLIAGTYK -ADVARTGTYTPLHLA  
Pedhum-CG10632 ~~~~~~IDPKTREWLVHAAKGEYQVLAKLAAECPKLVRTK -TALHWAAKHGNDVVKLIAGTYK -LNPVRTGTYTPLHLA  
Nasvit-CG10632 ~~~~~~MDGKREWLVRAAOGDYQALAKLAAEPRRLARTK -TALHWGAKHGNDVVKLIAGTCKDWIKSVNETSGYTPLHIA  
Apimel-CG10632 ~~~~~~LDGKREWLVRAAOGDYQALAKLAAEPRRLARTK -TALHWAAKHGNDVVKLIAGTYKDYIKSVNETSGYTPLHIA  
Braflo-CG10632 -VPSSQLYHHHTHRPOLMLDVLKEEWMLKAAVGNVSLRRLSLSDPNLASKK -TALHWGAKHGNOEIVALMADAGL -DVNLRSGYTPLHLA  
CaspI-CG10632 ~~~~~~LSAADREWITAAAADYHPMKNLLVSNPOLAKRK -TALHWACKOGKTEVVKLIAYPE -VNVNARSYTPLHLA  
Lotgig-CG10632 ~~~~~~YGAEKEWMLTCKADYHEMNRLLSKDSSLAKIR -TALHWAKHGKGEVVKLLVGPKG -VNIORSYTPLHLA  
Strpur-CG10632 ~~~~~~SASATTTTTPATTATSATGDAEAPQDDIPAP -SALHWGAKHGKEMIRLVDRGT -DVNLRSGYTPLHLA

Nemvec-CG10632 AMHGNDRVIKVLVDDFKADINARDFSGRKPQVAKDTLTIEAORRLEHVLTLS DSSSES GYSSQGQOTPKYGLNSIVTPSAALMGYGGG  
Dappul-CG10632 AMOGHADVDLLVKAYGADSNMRDYSGKKPHOYLSRPTVSIIDTFR -VNEKRRHLAKDL -GFLRIGSLNVRVKKTTEAFNLLSSAGG  
Tricas-CG10632 AOPGHRDIYDMLINEYHADSKIRDYSGRLPAYYLOS KDOKIRKDNIRKIKRKKPTIDKDL -GFLRIGSLNVRVKKTTEAFNLLSSAGG  
Dromel-CG10632 TOFGRDNIFELLWNVYKANRDIWDWSGNKPLDYSROR -SSVSASTCSKIKARKKHAIEKDL -GFLRIGSLNVRVKKTTEAFNLLSSAGG  
Drops-CG10632 TOFGRDNIFELLWNVYKANRDIWDWSGNKPLDYSROR -PSVSASTCSKIKARKKHTIEKDL -GFLRIGSLNVRVKKTTEAFNLLSSAGG  
Pedhum-CG10632 MOYEHEEIFDLLVOVYAADONLRDWSGKKPROYRANMDSVSAFTFRKIKARKKY -VEKES -GFLRIGSLNVRVKKTTEAFNLLSSAGG  
Nasvit-CG10632 LQFDHENIFNLLVOVYGANQDIRDYSGKKARQYLSVQAAVSDTMRKIKARKKHAIEKDL -GFLRIGSLNVRVKKTTEAFNLLSSAGG  
Apimel-CG10632 MOFDHENIFNLLVOVYANQDIRDYSGKKARQYLSVQAAVSDTMRKIKARKKHAIEKDL -GFLRIGSLNVRVKKTTEAFNLLSSAGG  
Braflo-CG10632 AMYGHDIIVKLLIDAYDADVTIRDYSGRRPGORLRPGSSSTNVDEVV -QRLVSDTLMSPFFISFCRGLR  
CaspI-CG10632 AMOGHEEVIEMLVQAYGADSNLRDYSGKKAKQYLRNSASTRAOQLLONRRP SAASAGAAP -FRRTGSSYSSKIRSTGHFGIAAGT  
Lotgig-CG10632 AMHGHEIDIIFLLVQYKADSNIRDYSGKKAKOYLKNSASSRTOOMLLSRLAAGSVKGLD -SFIRITLTKSNRAKAISSLIQATQS  
Strpur-CG10632 AMHNKEAIMQFLVSEYHADINKRDFSGRKPQVAKDTLTIEAORRLEHVLTLS DSSSES GYSSQGQOTPKYGLNSIVTPSAALMGYGGG -LAEPKQEKRRHSKIGS

Nemvec-CG10632 -----SSEAPLSVAQPPAESGDKKRRDRTSSLGKFLHKKK-----  
Dappul-CG10632 -----SGTFSTTKMYNKPWGSIDNLPIS--KMMPPPKNQG-----  
Tricas-CG10632 -----VTALETTSEKVKHKGWSADNVNOE--ENINPGPKINT-----  
Dromel-CG10632 PTGYGNGGS AVAANRHHPRSHRAPHORHHHHVGTTRSRHPNORAMSTPYATNGGLPSRASVPNSRNIYDGVHKSWSADNIPHRS EDLMPPP KAVEY  
Dropse-CG10632 PTGYGSGG-ATTANRHHORSHQHPHORHHHHVGTTRSRHPNORVAT-TPYGTNSIPGSRASVPNNRNIYDGVHKSWSADNITORT EDLMPPP KSV  
Pedhum-CG10632 -----LGOSSDKLLKSWGSADNVHENDK KLMOPPKSGA-----  
Nasvit-CG10632 -----TTKTSNNSEKIHKTWGSADNLPAD--KMMPPPKYAO-----  
Apimel-CG10632 -----ATSSASSNHEKIHKSWSADNVOLDG-KMMPPPKYAP-----  
Braflo-CG10632 ~~~~~  
CaspI-CG10632 -----AVRNSWAQLAOAERRGSS--OESLPSPKPSPKQSP-----  
Lotgig-CG10632 -----KVHRSKSTLLRSSWSSSEHVDDDDOPTPGSSSHSSP-----  
Strpur-CG10632 -----LLRSSFRHSFRIWGS AENLEDKNHKRDRTPPVTPP-----

Nemvec-CG10632 ---KSKDHRPMPSTPYP-----SNSSAGLLIGSPIELORMDEFERREVELDMK-----RTOSDPNLLHDE  
Dappul-CG10632 ---TVKKRKPDPPOP-----LISGPTN--LHHSNSFNGRPLOPTLIENK-----EYENDSDSAYGFGN  
Tricas-CG10632 ---VKKKSKRP-YSSG-----MNSTP-----GTPROMSRNFSSPHTN-----DSDSDS AAGFDS  
Dromel-CG10632 ISKRNKSSKRSSYASN-----TTDSPRDSICSSNSSSNLNGGYSSMPTTPNQLRAPKGI AAS-----FAVDSDSDSACGFDS  
Dropse-CG10632 -TKRNKSSKRSSYASN-----ATNSPRDSICSSNSSSNLNGGYSSMPTTPNOVRAPKGM DHTS-----FTADSDSDSACGFDS  
Pedhum-CG10632 --IKKRRKSKREVDYAH-----SRSTPTTPVOHRSSTIS-----VGSVEN-----YEQODSDSDTAAGFGA  
Nasvit-CG10632 --IKKRRRRATLISSQAVPITSSNSSSAOTASOPSTPTLLGKSATAGRRPASVSALTTGGLLAOTLSSGISTGSIQKDRHQOQNDSDSDGACGFDS  
Apimel-CG10632 --IKKRRSRAQDFSS-----LREHOTASQPTTPLLQCKVSRSSHQOMHRRPTST-----TAVSSAAS-----RTQQSNDSDSDTACGFDS  
Braflo-CG10632 ~~~~~KAESDPDVTGGFA  
CaspI-CG10632 OTWRKOSHSGSOELTMP-----PPRDLVRRHROSSRRDNKE-NHSDSELGAG-----GLSGSETDLTVGMDS  
Lotgig-CG10632 TTSRKGSFSDSSRDKTLM-----PPPSAPTORRNKSASRDNLOSTOSAS AIDPR-----SLSGARSGSDSALSS  
Strpur-CG10632 PSPKNRPKTSHSVNHQS-----FLMPPSSSYTVPNRRGRKLRSTDKDRTENMR-----KESNPDMIVET

Nemvec-CG10632 V-----  
Dappul-CG10632 NWQSS-----  
Tricas-CG10632 OWKH-----  
Dromel-CG10632 TWSVNCRGSSSNPQS  
Dropse-CG10632 SWSVSHLAAVGNNPTQS  
Pedhum-CG10632 OWOSKM-----  
Nasvit-CG10632 AWRGSA-----  
Apimel-CG10632 AWRGSAQL-----  
Braflo-CG10632 ~~~~~  
CaspI-CG10632 AASYPNISVOKASYV--  
Lotgig-CG10632 KNTYID-----  
Strpur-CG10632 TPTTFV-----
